# Supplementary material for: Mechanisms of Cu/DMAP-cocatalyzed and DMAP-catalyzed C–N decarboxylative cross-coupling reactions
Source: Royal Society of Chemistry journal article supplement (doi:10.1039/d4qo02352h), 2025-01-01
Supplement: d4qo02352h1.pdf [file d4qo02352h1.pdf]

## Supplementary Information

# Mechanisms of Cu/DMAP Cocatalyzed and DMAP-Catalyzed C-N Decarboxylative Cross-Coupling Reactions

Ruisheng Zhao,<sup>†,\*</sup> Chaomin Hao,<sup>†</sup> Dan Liu, Zizhong Liu,<sup>\*</sup> Yongsheng Bao<sup>\*</sup>

Inner Mongolia Key Laboratory of Green Catalysis, College of Chemistry and Environmental Science, Inner Mongolia Normal University, Hohhot 010022, China. E-mail: zhaoruisheng@imnu.edu.cn

### Contents

|                                                                                                                            |     |
|----------------------------------------------------------------------------------------------------------------------------|-----|
| S1 Original Envisioned Mechanism of Cu/DMAP Cocatalyzed and DMAP-Catalyzed C-N DCC Reactions                               | S2  |
| S2 Cu/DMAP Cocatalyzed C-N DCC Reactions                                                                                   | S3  |
| S2.1 Cu/DMAP Cocatalyzed C(aryl)-N DCC Reactions                                                                           | S3  |
| S2.2 Cu/DMAP Cocatalyzed C(sp <sup>3</sup> )-N DCC Reactions                                                               | S6  |
| S2.3 Supposing Cu(OAc) <sup>+</sup> instead of Cu(DMAP) <sup>2+</sup> as the Active Catalyst Species                       | S8  |
| S2.4 C-H Activation Ortho-Coupling Pattern                                                                                 | S11 |
| S3 DMAP-Catalyzed C-N DCC Reactions                                                                                        | S11 |
| S4 Influences of Neutral and Alkaline Conditions on Cu/DMAP Cocatalyzed and DMAP-Catalyzed (Metal-Free) C-N DCC Reactions. | S13 |
| S5 Curtius Rearrangement                                                                                                   | S15 |
| S6 Coordinates                                                                                                             | S16 |

S1 Original Envisioned Mechanism of Cu/DMAP Cocatalyzed and DMAP-Catalyzed C-N DCC Reactions

**a**

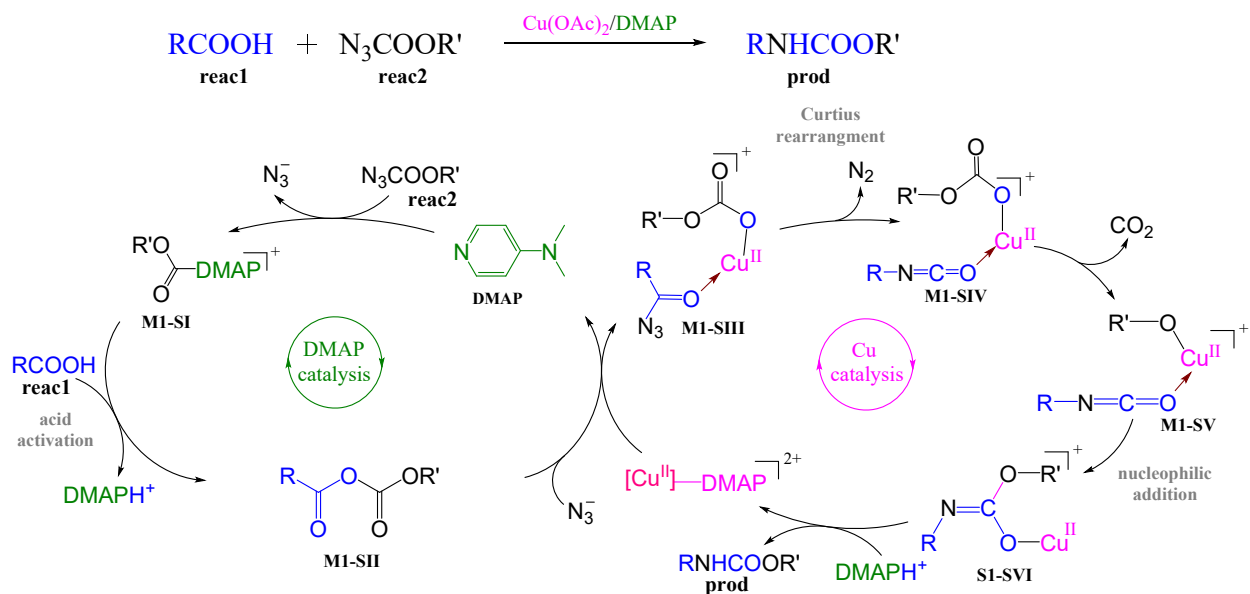

**b**

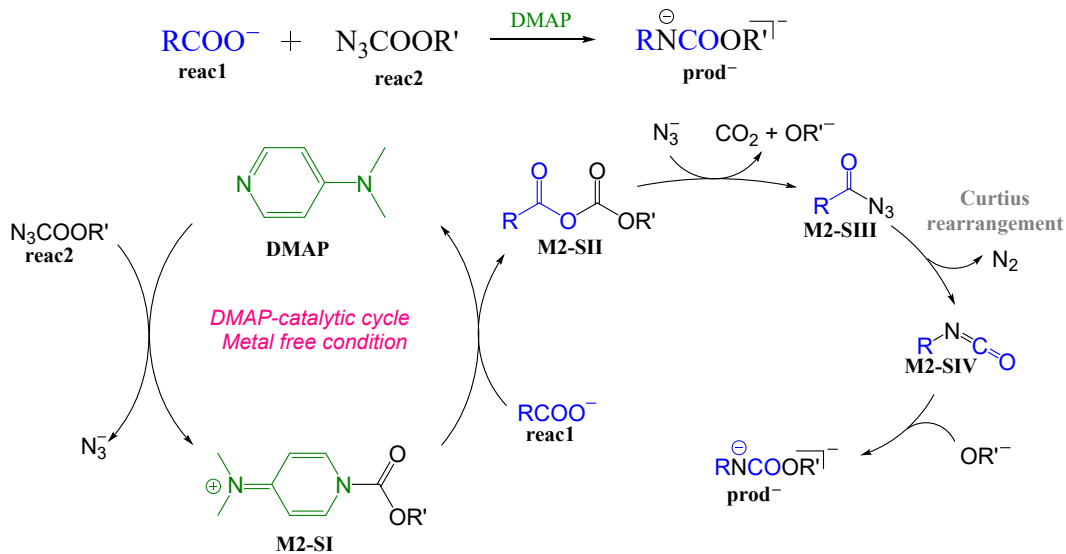

**Scheme S1** Original Envisioned Mechanisms of C-N DCC Reactions (a) Cocatalyzed by Cu/DMAP and (b) Catalyzed by DMAP (Refs. 8 and 9)

**S2 Cu/DMAP Cocatalyzed C-N DCC Reactions**  
 S2.1 Cu/DMAP Cocatalyzed C(aryl)-N DCC Reactions

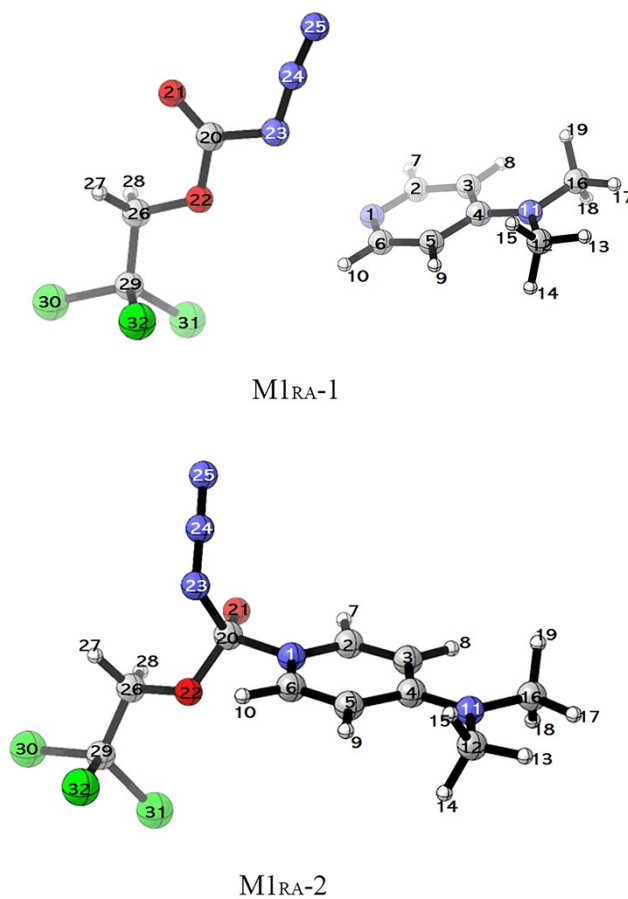

**Fig. S1** Optimized structures of **M1<sub>RA</sub>-1** and **M1<sub>RA</sub>-2**.

**Table S1** Natural Charges ( $q$ , in  $e$ ) of **M1<sub>RA</sub>-2** and **M1<sub>RA</sub>-1** and Natural Charge Variation ( $\Delta q$ ) between **M1<sub>RA</sub>-1** and **M1<sub>RA</sub>-2**

| atoms | $q(\mathbf{M1}_{\text{RA-2}})$ | $q(\mathbf{M1}_{\text{RA-1}})$ | $\Delta q^a$ |
|-------|--------------------------------|--------------------------------|--------------|
| N1    | -0.388                         | -0.549                         | 0.161        |
| C2    | 0.064                          | 0.008                          | 0.056        |
| C3    | -0.324                         | -0.353                         | 0.029        |
| C4    | 0.251                          | 0.208                          | 0.043        |
| C5    | -0.319                         | -0.353                         | 0.034        |
| C6    | 0.062                          | 0.008                          | 0.054        |
| H7    | 0.283                          | 0.233                          | 0.050        |
| H8    | 0.282                          | 0.260                          | 0.022        |
| H9    | 0.283                          | 0.260                          | 0.023        |
| H10   | 0.281                          | 0.233                          | 0.048        |
| N11   | -0.380                         | -0.420                         | 0.040        |
| C12   | -0.495                         | -0.490                         | -0.005       |
| H13   | 0.260                          | 0.253                          | 0.007        |
| H14   | 0.247                          | 0.235                          | 0.012        |
| H15   | 0.246                          | 0.235                          | 0.011        |
| C16   | -0.495                         | -0.490                         | -0.005       |

|      |        |        |        |
|------|--------|--------|--------|
| H17  | 0.260  | 0.253  | 0.007  |
| H18  | 0.245  | 0.234  | 0.011  |
| H19  | 0.245  | 0.235  | 0.010  |
| C20  | 0.897  | 0.923  | -0.026 |
| O21  | -0.773 | -0.618 | -0.155 |
| O22  | -0.618 | -0.540 | -0.078 |
| N23  | -0.430 | -0.395 | -0.035 |
| N24  | 0.225  | 0.259  | -0.034 |
| N25  | -0.182 | 0.036  | -0.218 |
| C26  | -0.162 | -0.174 | 0.012  |
| H27  | 0.258  | 0.285  | -0.027 |
| H28  | 0.267  | 0.285  | -0.018 |
| C29  | -0.137 | -0.154 | 0.017  |
| C130 | 0.018  | 0.035  | -0.017 |
| C131 | 0.016  | 0.029  | -0.013 |
| C132 | 0.013  | 0.029  | -0.016 |

$${}^a\Delta q=q(\mathbf{M1}_{\text{RA-2}})-q(\mathbf{M1}_{\text{RA-1}})$$

The natural charge variations  $\Delta q$  between  $\mathbf{M1}_{\text{RA-2}}$  and  $\mathbf{M1}_{\text{RA-1}}$  are collected in Table S1. The  $\Delta q(\text{N1})$  is the most positive one and the  $\Delta q(\text{O21})$  and  $\Delta q(\text{N25})$  are the two negative ones, indicating that the negative charge of the ylide intermediate  $\mathbf{M1}_{\text{RA-2}}$  mainly locates on the N1, namely N(pyridine), and the positive charge of  $\mathbf{M1}_{\text{RA-2}}$  mainly accumulates on the O21 and N25, i.e., O(carbonyl) and N(azide). The positive and negative charges of  $\mathbf{M1}_{\text{RA-2}}$  are labelled on the N(pyridine) and O(carbonyl) of the structural formula (see Fig. 1).

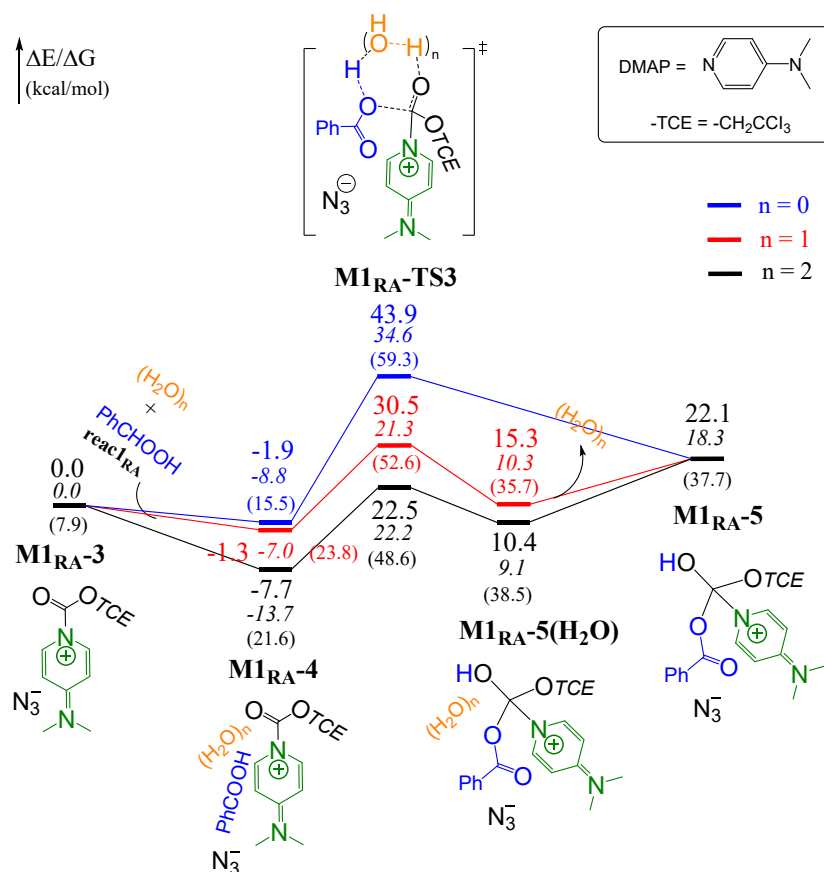

**Fig. S2** (Free, in parentheses) Energy profile of the carbonyl addition step ( $\mathbf{M1}_{\text{RA-3}}$  to  $\mathbf{M1}_{\text{RA-5}}$ ) facilitated by extra  $(\text{H}_2\text{O})_n$  ( $n=0, 1, 2$ ) molecule(s), and energies with counterpoise corrections are given in italics.

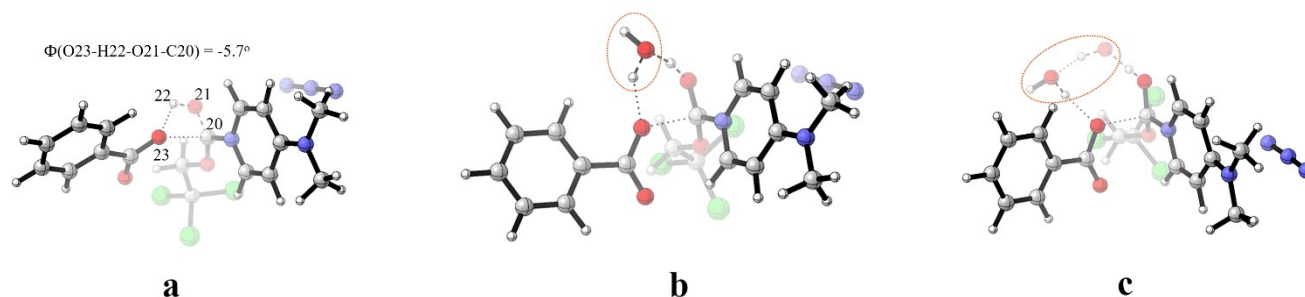

**Fig. S3** Optimized structures of **M1<sub>RA</sub>-TS3** (a) without and with (b) one and (c) two extra H<sub>2</sub>O molecule(s). (Extra H<sub>2</sub>O molecules are labelled with a dashed circle)

As shown in Figs. S2 and S3, extra H<sub>2</sub>O molecule(s) can act as a “water bridge” and reduce the barrier of the carbonyl addition step **M1<sub>RA</sub>-4** to **M1<sub>RA</sub>-5(H<sub>2</sub>O)**. When one and two extra H<sub>2</sub>O molecule(s) is (are) introduced as the “water bridge” which can facilitate hydrogen transfer, the energy barrier reduces from 45.8 kcal/mol to 31.8 and 30.2 kcal/mol, respectively, and the Gibbs free energy barrier reduces from 43.8 kcal/mol to 28.8 and 27.0 kcal/mol, respectively; if the BSSE is considered, the energy barrier reduces from 43.4 kcal/mol to 28.3 kcal/mol when one H<sub>2</sub>O molecule is introduced, but the energy barrier is increased to 35.9 kcal/mol, though, when two H<sub>2</sub>O molecule is introduced. Introduction of more extra H<sub>2</sub>O molecules will damage the structure of “water bridge”, as shown in Fig. S4, though. The distortion/interaction analysis indicate that introduction of extra H<sub>2</sub>O molecules as “water bridge” can decrease the distortion energy of PhCOOH moiety and increase the interaction energy, shown in Table S1.

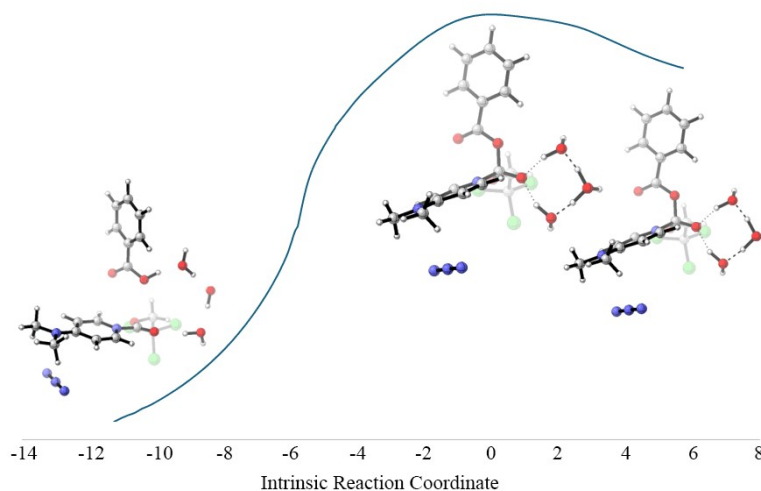

**Fig. S4** Reaction path of the carbonyl addition with three extra H<sub>2</sub>O molecules as “water bridge”

**Table S2** Distortion ( $\Delta E_{\text{dist}}$ ) and Interaction ( $\Delta E_{\text{int}}$ ) Energy (in kcal/mol) Analysis of the Carbonyl Addition Step

|                   | $\Delta E_{\text{dist}}$ |           |                |                    |                    |       | $\Delta E_{\text{int}}$ | $E^\ddagger$ |
|-------------------|--------------------------|-----------|----------------|--------------------|--------------------|-------|-------------------------|--------------|
|                   | PhCOOH                   | DMAP-Troc | N <sub>3</sub> | H <sub>2</sub> O-1 | H <sub>2</sub> O-2 | Sum   |                         |              |
| 0H <sub>2</sub> O | 95.3                     | 14.3      | 0.0            | —                  | —                  | 109.6 | -63.8                   | 45.8         |
| 1H <sub>2</sub> O | 94.9                     | 14.9      | 0.0            | 39.7               | —                  | 149.5 | -117.7                  | 31.8         |
| 2H <sub>2</sub> O | 85.5                     | 21.8      | 0.0            | 45.6               | 4.4                | 157.2 | -127.0                  | 30.2         |

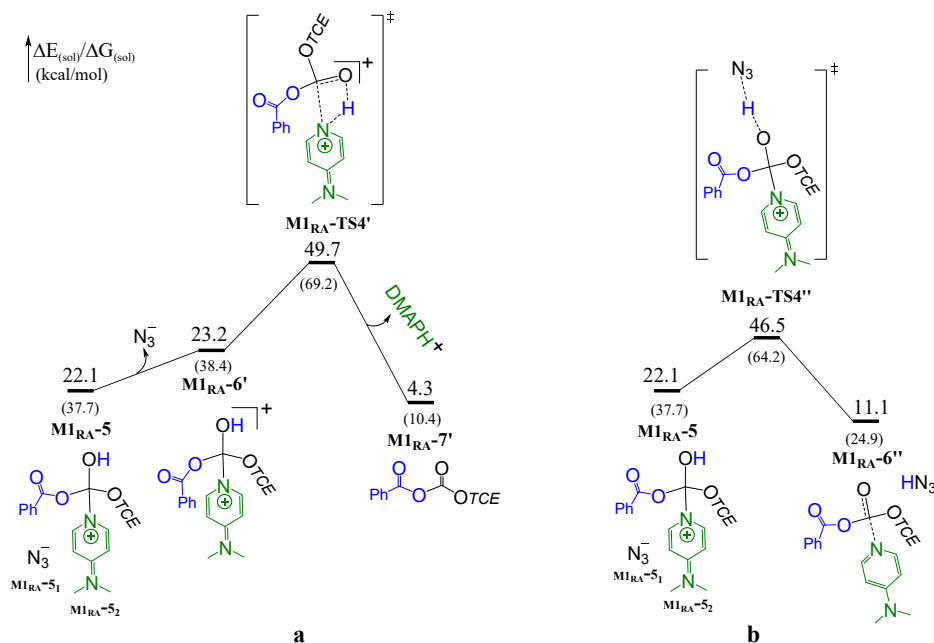

**Fig. S5** (Free, parentheses) Energy profiles of (a) the reaction path followed the original envisioned mechanism and (b) the reaction path without release of  $\text{N}_3^-$ .

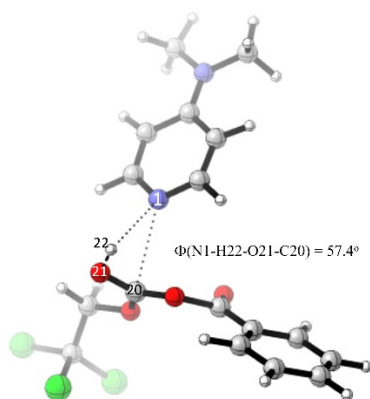

**Fig. S6** Optimized structure of  $\text{MI}_{\text{RA}}\text{-TS4}'$

The original envisioned mechanism for Cu/DMAP cocatalyzed C-N DCC reaction assumed that an anhydride intermediate ( $\text{MI}_{\text{RA}}\text{-SII}$  of Scheme S1a) is formed during the reaction, and this reaction path was also investigated. As illustrated in Fig. S5a, the  $\text{N}_3^-$  releases from the  $\text{MI}_{\text{RA}}\text{-5}$ , forming the intermediate  $\text{MI}_{\text{RA}}\text{-6}'$  with an increase of energy by 1.1 kcal/mol. Then, the H(hydroxyl) of  $\text{MI}_{\text{RA}}\text{-6}'$  migrates to N(pyridine), accompanied with the cleavage of C(ester)-N(pyridine) bond, and the anhydride intermediate  $\text{MI}_{\text{RA}}\text{-7}'$  (corresponding to  $\text{MI}_{\text{RA}}\text{-SII}$  of Scheme S1a) is formed via  $\text{MI}_{\text{RA}}\text{-TS4}'$ . The overall energy barrier ( $\text{MI}_{\text{RA}}\text{-TS4}'$  relative to  $\text{MI}_{\text{RA}}\text{-5}$ ) is as large as 27.6 kcal/mol, which is 10.2 kcal/mol higher than that of the competing step ( $\text{MI}_{\text{RA}}\text{-5}$  to  $\text{MI}_{\text{RA}}\text{-6}$ ) of the main path with an energy barrier of only 17.4 kcal/mol, as showing in Fig. 1. Different from the carbonyl addition step ( $\text{MI}_{\text{RA}}\text{-3}$  to  $\text{MI}_{\text{RA}}\text{-5}$ ), it is impossible to introduce extra  $\text{H}_2\text{O}$  molecules to the  $\text{DMAPH}^+$  elimination step ( $\text{MI}_{\text{RA}}\text{-6}'$  to  $\text{MI}_{\text{RA}}\text{-7}'$ ), because the four relating atoms, i.e., N1, H22, O21, C20, of  $\text{MI}_{\text{RA}}\text{-TS4}'$  are not in a plane, as shown in Fig. S6. The dihedral angle of N1-H22-O21-C20 is as large as  $57.4^\circ$ , while that of O23-H22-O21-C20 of  $\text{MI}_{\text{RA}}\text{-TS3}$  without extra  $\text{H}_2\text{O}$  molecule is only  $-5.7^\circ$  (see Fig. S3a). Noteworthy, before the  $\text{DMAPH}^+$  elimination step ( $\text{MI}_{\text{RA}}\text{-6}'$  to  $\text{MI}_{\text{RA}}\text{-7}'$ ),  $\text{N}_3^-$  must departure from the intermediate sphere ( $\text{MI}_{\text{RA}}\text{-5}$  to  $\text{MI}_{\text{RA}}\text{-6}'$ ). Otherwise, the  $\text{N}_3^-$  tends to abstract the H(hydroxyl) of  $\text{MI}_{\text{RA}}\text{-5}_2$  depicted in Fig. S5b, which will impede the formation of the following intermediate  $\text{MI}_{\text{RA}}\text{-8}$  (corresponding to  $\text{MI}_{\text{RA}}\text{-SIII}$  of Scheme S1a). Meanwhile, the release of  $\text{N}_3^-$  from  $\text{MI}_{\text{RA}}\text{-3}$  is also not favorable due to the attractive electrostatic interaction between the anionic  $\text{N}_3^-$  and cationic  $\text{DMAP-Troc}^+$  (-Trco, 2,2,2-trichloroethoxycarbonyl,  $-\text{COOCH}_2\text{CCl}_3$ ). Moreover, even if the anionic  $\text{N}_3^-$  can be released from  $\text{MI}_{\text{RA}}\text{-3}$  obeying the original envisioned mechanism, the following formation of anhydride intermediate step still need to overcome a barrier of 26.5

kcal/mol (**M1<sub>RA</sub>-TS4'** relative to **M1<sub>RA</sub>-5'**), which is still 9.1 kcal/mol higher than the competing step (**M1<sub>RA</sub>-5** to **M1<sub>RA</sub>-6**) of the main path. Therefore, the original envisioned anhydride intermediate **M1-SII** can be safely ruled out.

**Table S3** Natural and Mulliken (in parentheses) Charges of Cu ( $q(\text{Cu})$  in  $e$ ) of  $\text{Cu}(\text{DMAP})^{2+}$  and  $\text{Cu}(\text{OAc})^+$ , and Energy Levels (in Atomic Unit) of Several Most High-Lying Occupied and Low-Lying Unoccupied Molecules Orbitals of  $\text{Cu}(\text{DMAP})^{2+}$  and  $\text{Cu}(\text{OAc})^+$  (o, Occupied Orbitals; v, Virtual Orbitals).

| $q(\text{Cu})$ |  | $\text{Cu}(\text{DMAP})^{2+}$ |        |          |        | $\text{Cu}(\text{OAc})^+$ |        |          |        |
|----------------|--|-------------------------------|--------|----------|--------|---------------------------|--------|----------|--------|
|                |  | 1.633 (1.459)                 |        |          |        | 1.469 (1.229)             |        |          |        |
| E(MO)          |  | Alpha                         |        | Beta     |        | Alpha                     |        | Beta     |        |
|                |  |                               |        | MO47 (v) | 0.019  | MO46 (v)                  | 0.018  | MO30 (v) | 0.028  |
|                |  | MO46 (v)                      | 0.017  | MO45 (v) | -0.028 | MO29 (v)                  | 0.022  | MO28 (v) | 0.022  |
|                |  | MO45 (v)                      | -0.030 | MO44 (v) | -0.039 | MO28 (v)                  | 0.021  | MO27 (v) | -0.022 |
|                |  | MO44 (v)                      | -0.043 | MO43 (v) | -0.057 | MO27 (v)                  | -0.022 | MO26 (v) | -0.052 |
|                |  | MO43 (v)                      | -0.062 | MO42 (v) | -0.189 | MO26 (v)                  | -0.057 | MO25 (v) | -0.174 |
|                |  | MO42 (o)                      | -0.239 | MO41 (o) | -0.230 | MO25 (o)                  | -0.316 | MO24 (o) | -0.322 |
|                |  | MO41 (o)                      | -0.290 | MO40 (o) | -0.289 | MO24 (o)                  | -0.329 | MO23 (o) | -0.333 |
|                |  | MO40 (o)                      | -0.339 | MO39 (o) | -0.338 | MO23 (o)                  | -0.354 | MO22 (o) | -0.334 |
|                |  | MO39 (o)                      | -0.344 | MO38 (o) | -0.360 | MO22 (o)                  | -0.380 | MO21 (o) | -0.365 |
|                |  | MO38 (o)                      | -0.370 | MO37 (o) | -0.361 | MO21 (o)                  | -0.398 | MO20 (o) | -0.378 |

## S2.2 Cu/DMAP Cocatalyzed C(sp<sup>3</sup>)-N DCC Reactions

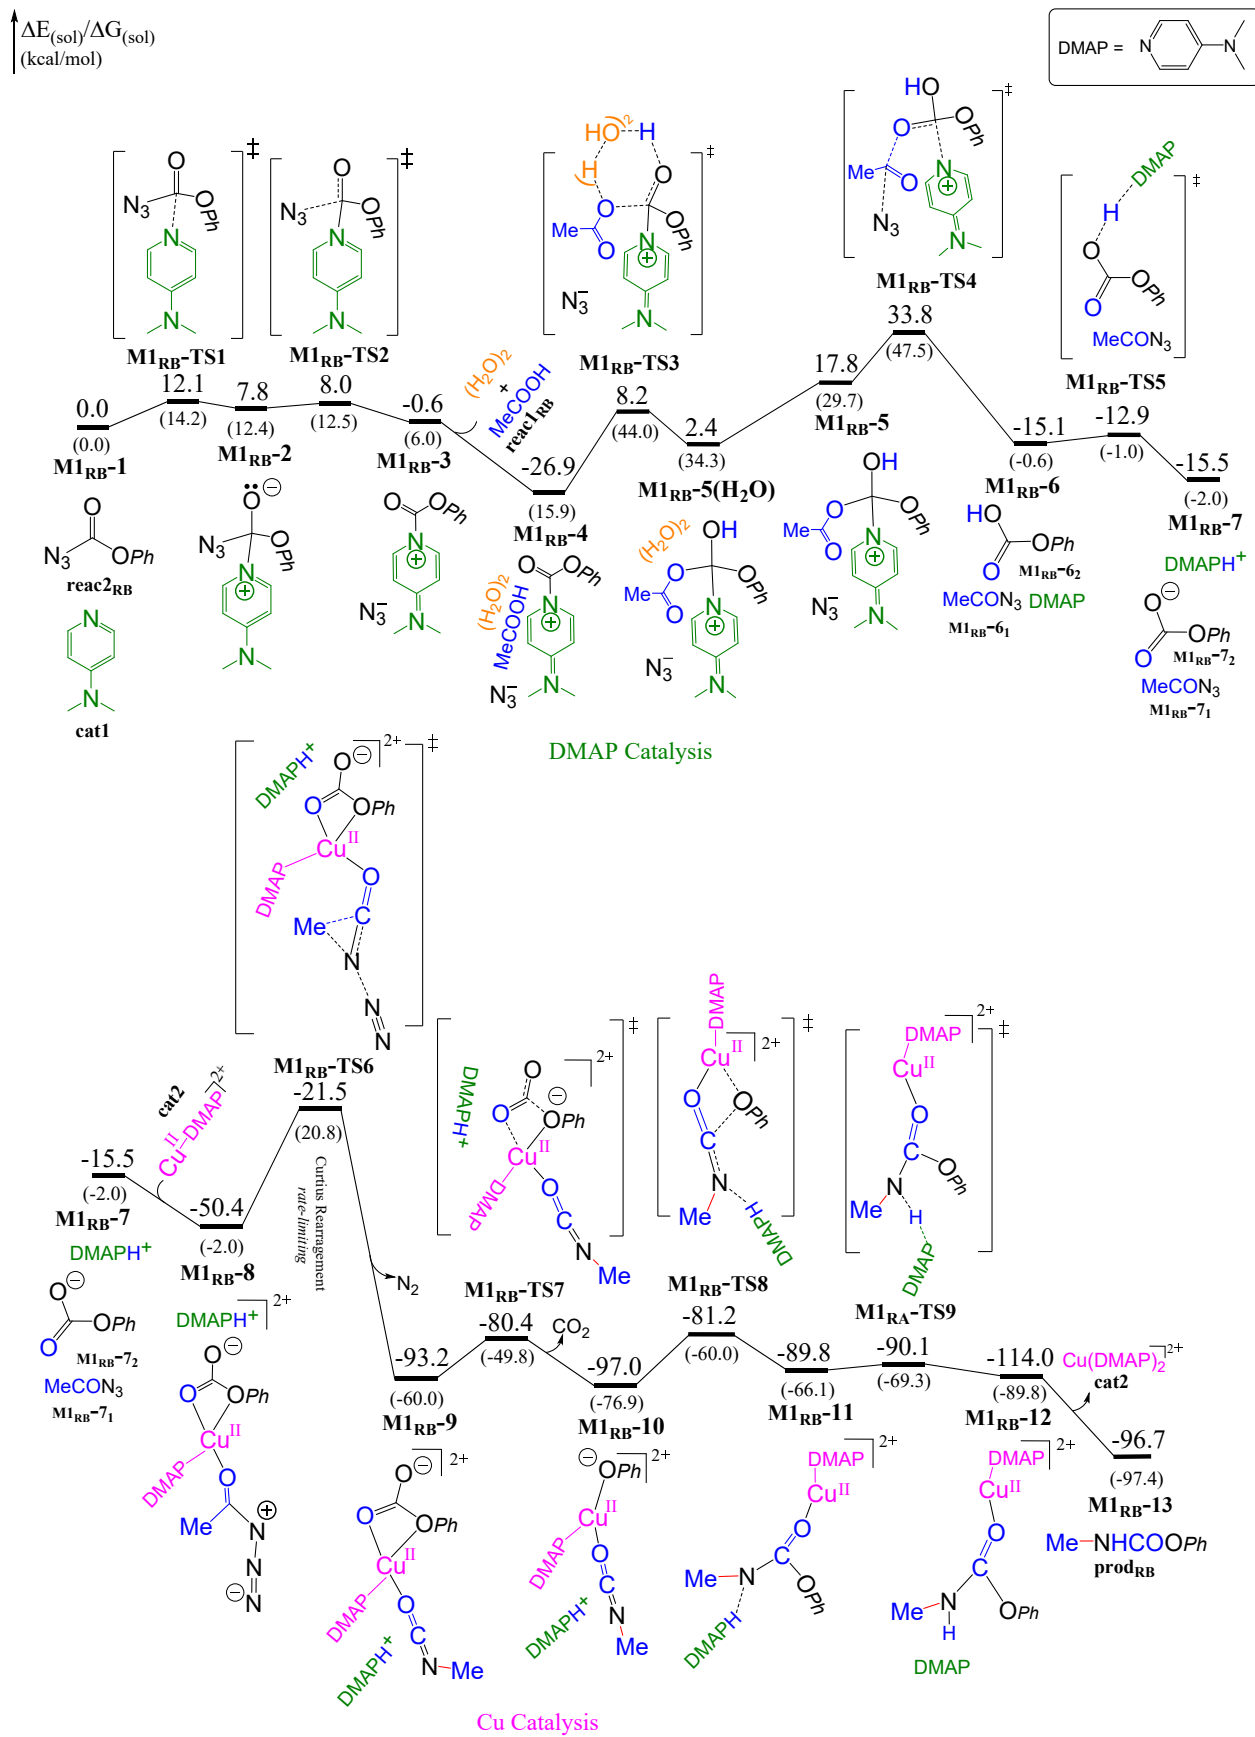

**Fig. S7** (Free, in parentheses) Energy profile for the Cu/DMAP cocatalyzed C(sp<sup>3</sup>)-N DCC reactions. (Up, DMAP catalysis cycle; down, Cu catalysis cycle)



The Cu/DMAP cocatalyzed C(sp<sup>3</sup>)-N DCC reaction was also investigated utilizing the model reaction B, and the energy profile is portrayed in Fig. S7. In general, the energy profile is on par with that of the C(aryl)-N one shown in Fig. 1. Same with the case of C(aryl)-N DCC reaction, extra H<sub>2</sub>O molecules also can act as a “water bridge” to assist the hydrogen transfer and to facilitate the carbonyl addition step, and the energy profile of the carbonyl addition step (**M1<sub>RB-3</sub>** to **M1<sub>RB-5</sub>**) of the C(sp<sup>3</sup>)-N DCC reaction with 0 – 3 extra H<sub>2</sub>O molecule(s) is depicted in Fig. S8.

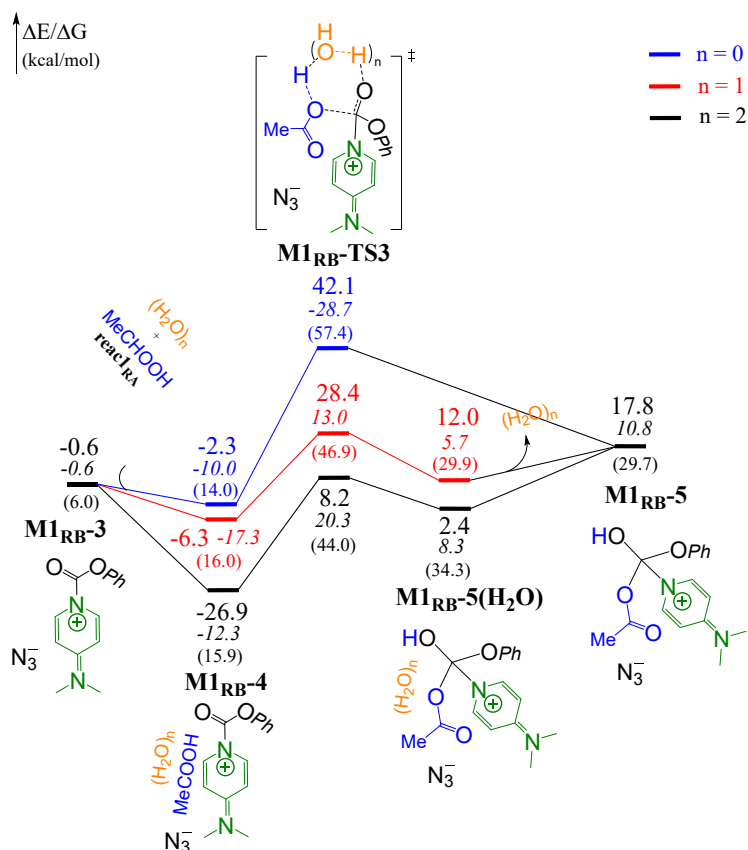

**Fig. S8** (Free, in parentheses) Energy profile of the carbonyl addition step (**M1<sub>RB-3</sub>** to **M1<sub>RB-5</sub>**) facilitated by extra (H<sub>2</sub>O)<sub>n</sub> (n=0, 1, 2) molecule(s), and energies with counterpoise corrections are given in italics.

### S2.3 Supposing Cu(OAc)<sup>+</sup> instead of Cu(DMAP)<sup>2+</sup> as the Active Catalyst Species

**Table S4** Energy Levels (in Atomic Unit) of Molecular Orbitals of Cu(DMAP)<sup>2+</sup> and Cu(OAc)<sup>+</sup>. (Twenty Most High-Lying Occupied and Low-Lying Unoccupied Molecular Orbitals are listed. *o*, Occupied Orbitals; *v*, Virtual Orbitals)

| Cu(DMAP) <sup>2+</sup> |         |         |         | Cu(OAc) <sup>+</sup> |         |         |         |
|------------------------|---------|---------|---------|----------------------|---------|---------|---------|
| Alpha                  |         | Beta    |         | Alpha                |         | Beta    |         |
| MO62(v)                | 0.18825 | MO61(v) | 0.18165 | MO45(v)              | 0.61756 | MO44(v) | 0.61108 |
| MO61(v)                | 0.18126 | MO60(v) | 0.17563 | MO44(v)              | 0.61069 | MO43(v) | 0.57302 |
| MO60(v)                | 0.17510 | MO59(v) | 0.17344 | MO43(v)              | 0.57086 | MO42(v) | 0.56373 |
| MO59(v)                | 0.17252 | MO58(v) | 0.16764 | MO42(v)              | 0.56054 | MO41(v) | 0.52949 |
| MO58(v)                | 0.16594 | MO57(v) | 0.16224 | MO41(v)              | 0.52984 | MO40(v) | 0.42722 |
| MO57(v)                | 0.16049 | MO56(v) | 0.15712 | MO40(v)              | 0.42358 | MO39(v) | 0.34955 |
| MO56(v)                | 0.15666 | MO55(v) | 0.13614 | MO39(v)              | 0.34566 | MO38(v) | 0.33984 |
| MO55(v)                | 0.13564 | MO54(v) | 0.13322 | MO38(v)              | 0.33531 | MO37(v) | 0.22885 |
| MO54(v)                | 0.13090 | MO53(v) | 0.12522 | MO37(v)              | 0.22782 | MO36(v) | 0.18194 |
| MO53(v)                | 0.12484 | MO52(v) | 0.11910 | MO36(v)              | 0.18150 | MO35(v) | 0.17147 |
| MO52(v)                | 0.11668 | MO51(v) | 0.10810 | MO35(v)              | 0.16956 | MO34(v) | 0.16937 |

|         |          |         |          |         |          |         |          |
|---------|----------|---------|----------|---------|----------|---------|----------|
| MO51(v) | 0.10589  | MO50(v) | 0.10544  | MO34(v) | 0.16742  | MO33(v) | 0.15238  |
| MO50(v) | 0.10467  | MO49(v) | 0.10102  | MO33(v) | 0.15169  | MO32(v) | 0.12933  |
| MO49(v) | 0.10047  | MO48(v) | 0.03475  | MO32(v) | 0.12687  | MO31(v) | 0.11689  |
| MO48(v) | 0.03411  | MO47(v) | 0.01953  | MO31(v) | 0.11740  | MO30(v) | 0.02864  |
| MO47(v) | 0.01876  | MO46(v) | 0.01761  | MO30(v) | 0.02822  | MO29(v) | 0.02224  |
| MO46(v) | 0.01710  | MO45(v) | -0.02819 | MO29(v) | 0.02186  | MO28(v) | 0.02198  |
| MO45(v) | -0.02983 | MO44(v) | -0.03903 | MO28(v) | 0.02124  | MO27(v) | -0.02166 |
| MO44(v) | -0.04305 | MO43(v) | -0.05651 | MO27(v) | -0.02232 | MO26(v) | -0.05248 |
| MO43(v) | -0.06169 | MO42(v) | -0.18863 | MO26(v) | -0.05695 | MO25(v) | -0.17359 |
| MO42(o) | -0.23906 | MO41(o) | -0.23028 | MO25(o) | -0.31584 | MO24(o) | -0.32156 |
| MO41(o) | -0.28973 | MO40(o) | -0.28875 | MO24(o) | -0.32922 | MO23(o) | -0.33282 |
| MO40(o) | -0.38879 | MO39(o) | -0.33755 | MO23(o) | -0.35409 | MO22(o) | -0.33391 |
| MO39(o) | -0.34418 | MO38(o) | -0.36027 | MO22(o) | -0.37988 | MO21(o) | -0.36483 |
| MO38(o) | -0.36996 | MO37(o) | -0.36109 | MO21(o) | -0.39817 | MO20(o) | -0.37846 |
| MO37(o) | -0.38516 | MO36(o) | -0.36760 | MO20(o) | -0.40094 | MO19(o) | -0.38210 |
| MO36(o) | -0.38523 | MO35(o) | -0.36922 | MO19(o) | -0.41101 | MO18(o) | -0.40256 |
| MO35(o) | -0.39186 | MO34(o) | -0.39138 | MO18(o) | -0.41114 | MO17(o) | -0.40520 |
| MO34(o) | -0.40533 | MO33(o) | -0.39574 | MO17(o) | -0.41184 | MO16(o) | -0.41004 |
| MO33(o) | -0.41051 | MO32(o) | -0.39641 | MO16(o) | -0.44092 | MO15(o) | -0.48589 |
| MO32(o) | -0.41066 | MO31(o) | -0.41115 | MO15(o) | -0.48837 | MO14(o) | -0.49568 |
| MO31(o) | -0.41310 | MO30(o) | -0.41218 | MO14(o) | -0.50840 | MO13(o) | -0.50337 |
| MO30(o) | -0.43685 | MO29(o) | -0.43353 | MO13(o) | -0.52298 | MO12(o) | -0.56377 |
| MO29(o) | -0.45084 | MO28(o) | -0.45011 | MO12(o) | -0.56802 | MO11(o) | -0.76098 |
| MO28(o) | -0.45126 | MO27(o) | -0.45769 | MO11(o) | -0.76254 | MO10(o) | -1.00352 |
| MO27(o) | -0.45863 | MO26(o) | -0.47767 | MO10(o) | -1.01670 | MO9(o)  | -1.11837 |
| MO26(o) | -0.48136 | MO25(o) | -0.48327 | MO9(o)  | -1.12857 | MO8(o)  | -2.90366 |
| MO25(o) | -0.48465 | MO24(o) | -0.49327 | MO8(o)  | -2.91674 | MO7(o)  | -2.91255 |
| MO24(o) | -0.50676 | MO23(o) | -0.52608 | MO7(o)  | -2.97359 | MO6(o)  | -2.91330 |

**Table S5** Energy Levels (in Atomic Unit) of Molecular Orbitals of PhCON<sub>3</sub> (**MI<sub>RA</sub>-7<sub>1</sub>**) and Troc-COO<sup>-</sup> (**MI<sub>RA</sub>-7<sub>2</sub>**). (Twenty Most High-Lying Occupied and Most Low-Lying Unoccupied Molecular Orbitals are listed. *o*, Occupied Orbitals; *v*, Virtual Orbitals)

| PhCON <sub>3</sub> ( <b>MI<sub>RA</sub>-7<sub>1</sub></b> ) |         |         |          | Troc-COO <sup>-</sup> ( <b>MI<sub>RA</sub>-7<sub>2</sub></b> ) |         |         |          |
|-------------------------------------------------------------|---------|---------|----------|----------------------------------------------------------------|---------|---------|----------|
| MO58(v)                                                     | 0.44965 | MO38(o) | -0.25963 | MO68(v)                                                        | 0.48366 | MO48(o) | -0.20209 |
| MO57(v)                                                     | 0.37767 | MO37(o) | -0.26157 | MO67(v)                                                        | 0.46115 | MO47(o) | -0.22061 |
| MO56(v)                                                     | 0.36385 | MO36(o) | -0.27804 | MO66(v)                                                        | 0.44434 | MO46(o) | -0.23761 |
| MO55(v)                                                     | 0.30675 | MO35(o) | -0.29132 | MO65(v)                                                        | 0.43550 | MO45(o) | -0.25313 |
| MO54(v)                                                     | 0.30334 | MO34(o) | -0.34179 | MO64(v)                                                        | 0.42323 | MO44(o) | -0.30047 |
| MO53(v)                                                     | 0.28775 | MO33(o) | -0.35595 | MO63(v)                                                        | 0.41394 | MO43(o) | -0.30748 |
| MO52(v)                                                     | 0.27730 | MO32(o) | -0.36065 | MO62(v)                                                        | 0.40677 | MO42(o) | -0.31336 |
| MO51(v)                                                     | 0.24709 | MO31(o) | -0.36632 | MO61(v)                                                        | 0.37698 | MO41(o) | -0.31645 |
| MO50(v)                                                     | 0.20599 | MO30(o) | -0.42410 | MO60(v)                                                        | 0.36872 | MO40(o) | -0.32588 |
| MO49(v)                                                     | 0.19379 | MO29(o) | -0.42416 | MO59(v)                                                        | 0.34658 | MO39(o) | -0.34506 |
| MO48(v)                                                     | 0.17223 | MO28(o) | -0.43446 | MO58(v)                                                        | 0.30469 | MO38(o) | -0.34740 |
| MO47(v)                                                     | 0.16886 | MO27(o) | -0.44562 | MO57(v)                                                        | 0.27275 | MO37(o) | -0.36945 |

|         |          |         |          |         |          |         |          |
|---------|----------|---------|----------|---------|----------|---------|----------|
| MO46(v) | 0.15908  | MO26(o) | -0.45802 | MO56(v) | 0.19997  | MO36(o) | -0.37924 |
| MO45(v) | 0.15304  | MO25(o) | -0.47802 | MO55(v) | 0.18988  | MO35(o) | -0.41813 |
| MO44(v) | 0.10392  | MO24(o) | -0.49486 | MO54(v) | 0.17224  | MO34(o) | -0.42465 |
| MO43(v) | 0.06763  | MO23(o) | -0.51974 | MO53(v) | 0.15593  | MO33(o) | -0.44933 |
| MO42(v) | -0.00216 | MO22(o) | -0.53392 | MO52(v) | 0.12291  | MO32(o) | -0.47104 |
| MO41(v) | -0.01100 | MO21(o) | -0.54770 | MO51(v) | 0.01430  | MO31(o) | -0.48582 |
| MO40(v) | -0.04637 | MO20(o) | -0.60111 | MO50(v) | 0.00804  | MO30(o) | -0.52624 |
| MO39(v) | -0.07117 | MO19(o) | -0.61951 | MO49(v) | -0.03588 | MO29(o) | -0.58837 |

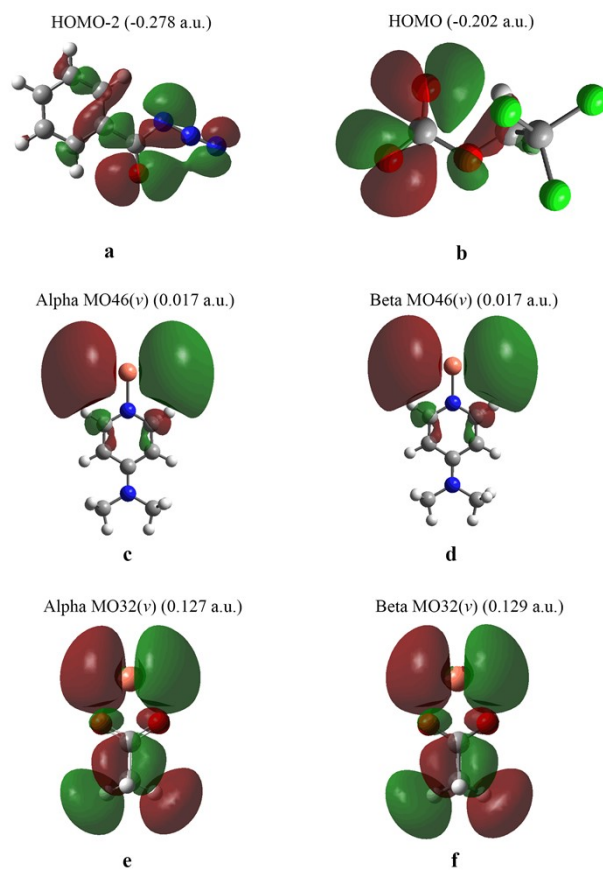

**Fig. S9** (a) HOMO-2 of PhCON3  $\mathbf{M1}_{RA-71}$ , (b) HOMO of OTroc<sup>-</sup>  $\mathbf{M1}_{RA-72}$ , (c) Alpha MO46(v) and (d) Beta MO46(v) of Cu(DMAP)<sup>2+</sup> and (e) Alpha MO32(v) and (f) Beta MO32(v) of Cu(OAc)<sup>+</sup> (v, Virtual Orbital).

For instance, as shown in Fig. S9, the portions populated on O atoms of HOMO-2 of  $\mathbf{M1}_{RA-71}$  and HOMO of  $\mathbf{M1}_{RA-72}$  possess significant lone-pair electron characteristics, and the alpha MO46(v) and beta MO46(v) of Cu(DMAP)<sup>2+</sup> and alpha MO32(v) and beta MO32(v) of Cu(OAc)<sup>+</sup> can symmetrically match with the HOMO-2 and HOMO, and the alpha MO46(v) and beta MO46(v) of Cu(DMAP)<sup>2+</sup> are much lower in energy level than alpha MO32(v) and beta MO32(v) of Cu(OAc)<sup>+</sup>. Therefore, when alpha MO46(v) and beta MO46(v) of Cu(DMAP)<sup>2+</sup> combine with HOMO-2 of  $\mathbf{M1}_{RA-71}$  and HOMO of  $\mathbf{M1}_{RA-72}$ , lower-energy bonding orbital of  $\mathbf{M1}_{RA-8}$  will be formed.

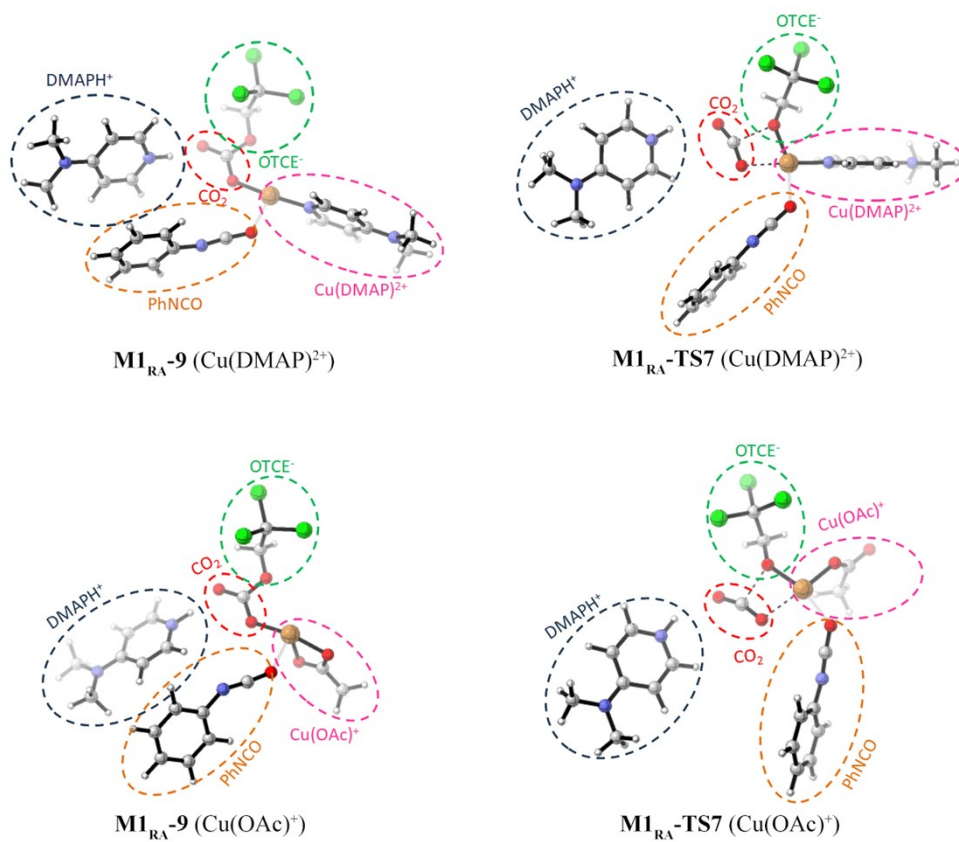

**Fig. S10** Divided fragments of **M1<sub>RA</sub>-9** and **M1<sub>RA</sub>-TS7** during the distortion-interaction analysis.

## S2.4 C-H Activation Ortho-Coupling Pattern

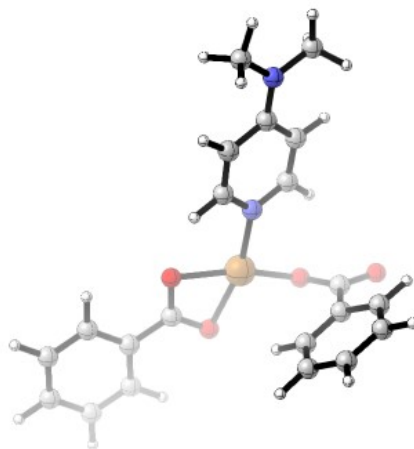

Fig. S11 Optimized structure of  $MI'_{RA}-1$

### S3 DMAP-Catalyzed C-N DCC Reactions

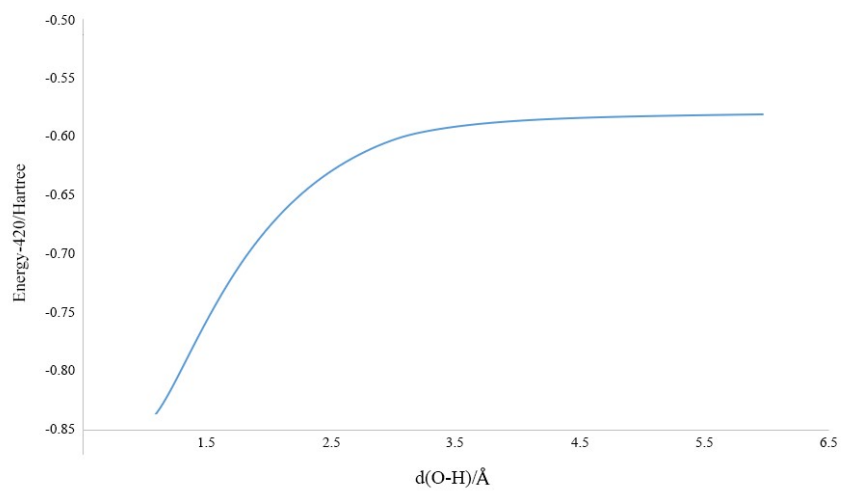

Fig. S12 Potential energy surface scan of elongation of O-H bond of PhCOOH

The potential energy surface scan of elongation of O-H bond of PhCOOH is illustrated in Fig. S12, indicating that the O-H bond energy of PhCOOH is over 166.8 kcal/mol (0.2659 Hartree).

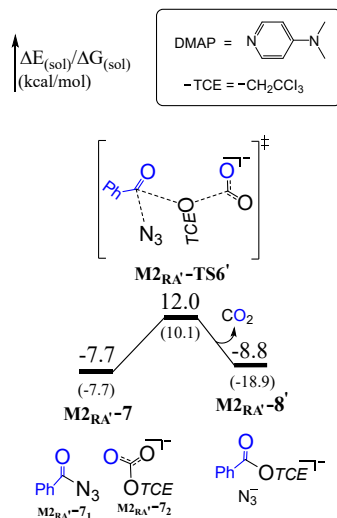

**Fig. S13** (Free, in parentheses) Energy profile of the original envisioned mechanism of DMAP-catalyzed C-N DCC reaction.

The calculated results indicates that after the attack of  $N_3^-$  to the anhydride intermediate ( $M2_{RA'}-6_1$ ), the alkoxy anion (plus  $CO_2$ ) intermediate is not formed, as proposed by the original envisioned mechanism ( $M2-SII$  to  $M2-SIII$  of Scheme S1b), and instead a carbonate intermediate  $M2_{RA'}-7_2$  (corresponding to  $M2-III_2$  of Scheme 1b) is formed, as shown in Fig. 4 ( $M2_{RA'}-6$  to  $M2_{RA'}-7$ ). Therefore, can the  $CO_2$  be extruded from  $M2_{RA'}-7_2$ ? This step was calculated, and the energy profile is shown in Fig. S13. If  $M2_{RA'}-7_2$  undergoes the decarboxylation, the  $-OTCE$  group  $M2_{RA'}-7_2$  will simultaneously transfer to  $M2_{RA'}-7_1$ , and at the same time, the  $N_3^-$  will be detached from  $M2_{RA'}-7_1$ , resulting in  $M2_{RA'}-8'$ . This way, it is impossible to generate the final product, so the original envisioned mechanism can be excluded.

#### S4 Influences of Neutral and Alkaline Conditions on Cu/DMAP Cocatalyzed and DMAP-Catalyzed (Metal-Free) C-N DCC Reactions.

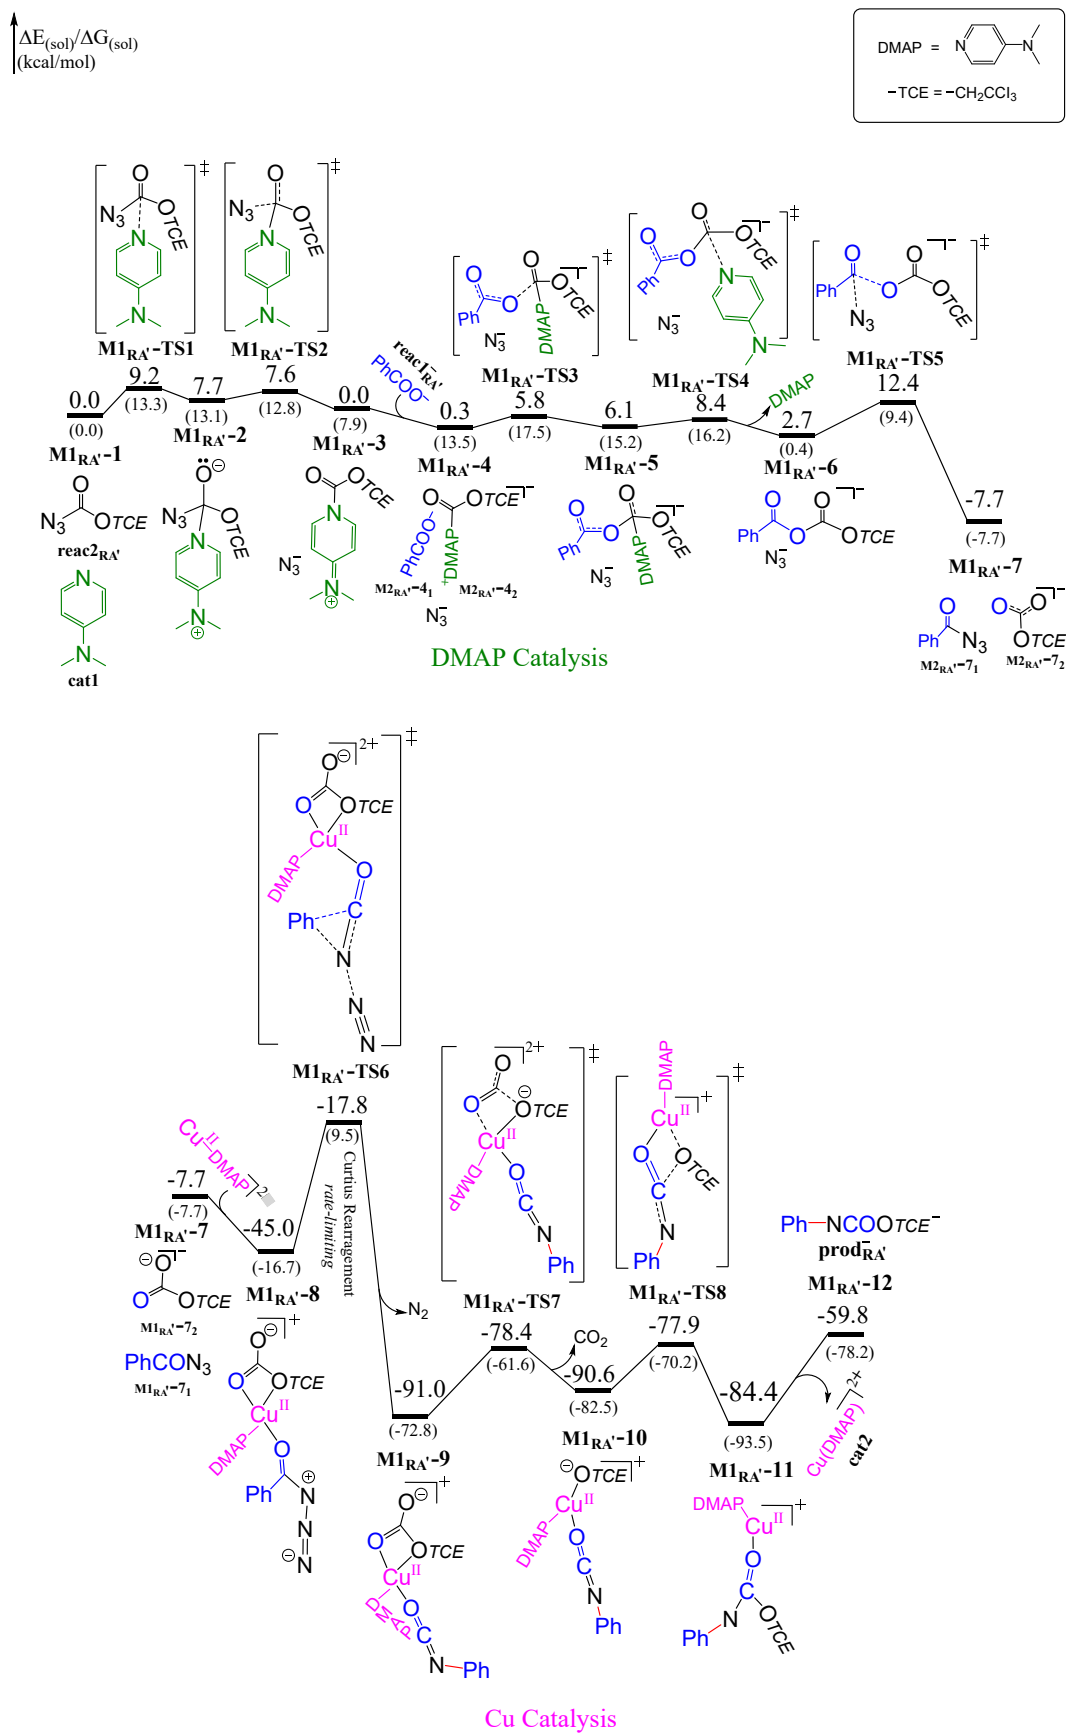

**Fig. S14** (Free, in parentheses) Energy profile of Cu/DMAP cocatalyzed C-N DCC reaction, assuming carboxylate as the carbon source (under alkaline condition)

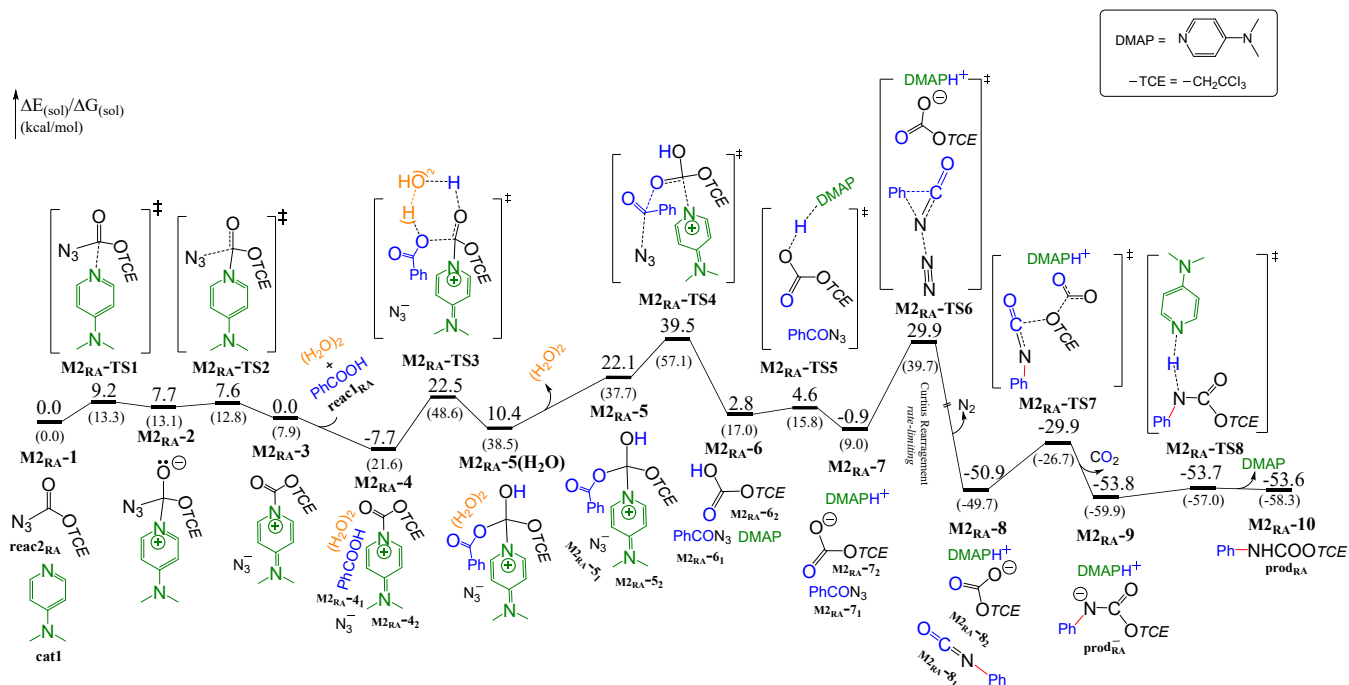

**Fig. S15** (Free, in parentheses) Energy profile of DMAP-catalyzed C-N DCC reaction, assuming carboxylic acid as the carbon source (under neutral condition)

### S5 Curtius Rearrangement

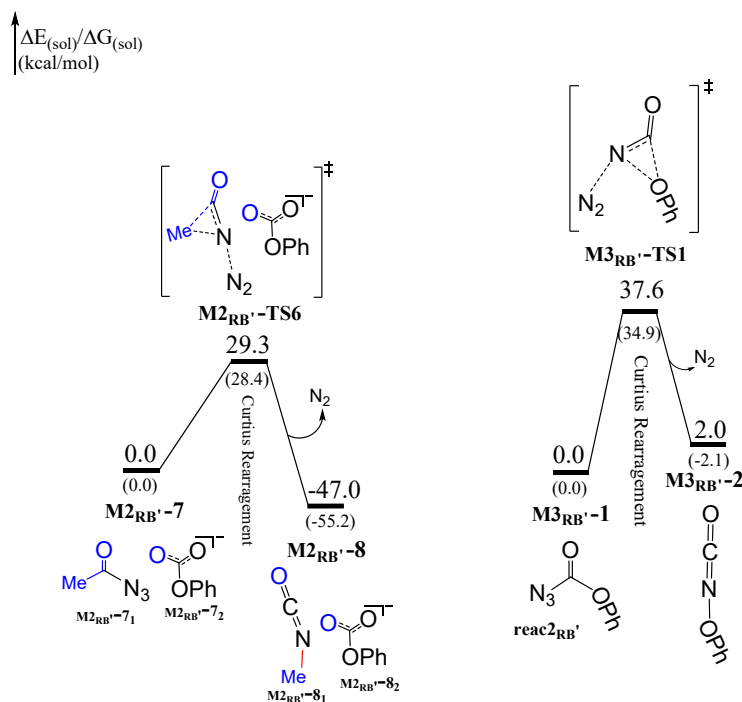

**Fig. S16** (Free, in parentheses) Energy profiles of the Curtius Rearrangement of DMAP-catalyzed (left) and catalyst-free (right) C(sp<sup>3</sup>)-N DCC reaction, assuming carboxylic acid as the carbon source

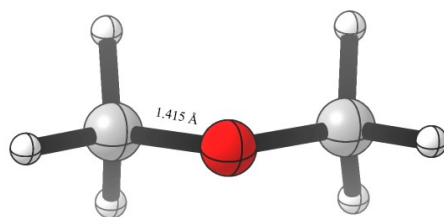



Fig. S17 Optimized Structures of methoxymethane, aiming to provide a benchmark for C-O sing bond

**S6 Coordinates**

**DMAP**

|   |           |           |           |
|---|-----------|-----------|-----------|
| C | 1.956204  | -1.135775 | -0.004552 |
| C | 0.570510  | -1.200907 | -0.004709 |
| C | -0.185148 | 0.000019  | -0.000071 |
| C | 0.570532  | 1.200930  | 0.004648  |
| C | 1.956239  | 1.135760  | 0.004558  |
| N | 2.677849  | -0.000011 | 0.000046  |
| H | 2.524957  | -2.065024 | -0.008691 |
| H | 0.087685  | -2.169933 | -0.009891 |
| H | 0.087728  | 2.169963  | 0.009895  |
| H | 2.525006  | 2.065001  | 0.008843  |
| N | -1.550583 | 0.000001  | -0.000116 |
| C | -2.283486 | 1.260338  | -0.008067 |
| H | -2.038640 | 1.865723  | -0.889827 |
| H | -3.352292 | 1.049287  | -0.029634 |
| H | -2.071448 | 1.860078  | 0.886322  |
| C | -2.283450 | -1.260351 | 0.008173  |
| H | -2.038616 | -1.865563 | 0.890056  |
| H | -3.352253 | -1.049292 | 0.029642  |
| H | -2.071398 | -1.860256 | -0.886094 |

**DMAPH<sup>+</sup>**

|   |           |           |           |
|---|-----------|-----------|-----------|
| C | 1.887373  | 1.181611  | 0.006962  |
| C | 0.520159  | 1.216722  | 0.006377  |
| C | -0.232607 | 0.000012  | -0.000382 |
| C | 0.520171  | -1.216704 | -0.006995 |
| C | 1.887381  | -1.181612 | -0.006871 |
| N | 2.552558  | 0.000001  | 0.000195  |
| H | 2.496711  | 2.076369  | 0.013434  |
| H | 0.032070  | 2.180595  | 0.014135  |
| H | 0.032069  | -2.180568 | -0.015073 |
| H | 2.496739  | -2.076359 | -0.013100 |
| N | -1.576196 | -0.000001 | -0.000241 |
| C | -2.319425 | 1.263209  | -0.012019 |
| H | -2.062583 | 1.862554  | -0.891566 |
| H | -3.384574 | 1.042636  | -0.045967 |
| H | -2.113533 | 1.850959  | 0.888996  |
| C | -2.319380 | -1.263235 | 0.012509  |
| H | -2.062759 | -1.861774 | 0.892684  |
| H | -3.384550 | -1.042673 | 0.045839  |
| H | -2.113197 | -1.851790 | -0.887904 |
| H | 3.567041  | 0.000039  | 0.001363  |

**PhCOOH**

|   |          |          |           |
|---|----------|----------|-----------|
| C | 0.449519 | 1.203958 | -0.000141 |
|---|----------|----------|-----------|

|   |           |           |           |
|---|-----------|-----------|-----------|
| C | -0.221977 | -0.028236 | 0.000051  |
| C | 0.512644  | -1.223076 | 0.000203  |
| C | 1.904874  | -1.187243 | 0.000057  |
| C | 2.571392  | 0.041855  | -0.000054 |
| C | 1.843258  | 1.234867  | -0.000063 |
| H | -0.116659 | 2.128507  | -0.000442 |
| H | -0.019705 | -2.168240 | 0.000422  |
| H | 2.470384  | -2.114180 | 0.000167  |
| H | 3.657277  | 0.069879  | -0.000028 |
| H | 2.361467  | 2.189062  | -0.000274 |
| O | -2.337800 | -1.160513 | -0.000385 |
| C | -1.706055 | -0.117984 | 0.000076  |
| O | -2.312339 | 1.088889  | 0.000334  |
| H | -3.273589 | 0.923122  | -0.000227 |

**H<sub>2</sub>O**

|   |          |           |           |
|---|----------|-----------|-----------|
| O | 0.000000 | 0.000000  | 0.120415  |
| H | 0.000000 | -0.757293 | -0.481659 |
| H | 0.000000 | 0.757293  | -0.481659 |

**N<sub>2</sub>**

|   |          |          |           |
|---|----------|----------|-----------|
| N | 0.000000 | 0.000000 | 0.552500  |
| N | 0.000000 | 0.000000 | -0.552500 |

**CO<sub>2</sub>**

|   |          |          |           |
|---|----------|----------|-----------|
| C | 0.000000 | 0.000000 | -0.000018 |
| O | 0.000000 | 0.000000 | 1.169012  |
| O | 0.000000 | 0.000000 | -1.168998 |

**Cu(DMAP)<sub>2</sub><sup>2+</sup>**

|    |           |           |           |
|----|-----------|-----------|-----------|
| Cu | 3.202951  | -0.000017 | -0.000041 |
| C  | 0.536365  | 1.166063  | 0.011522  |
| C  | -0.837239 | 1.216706  | 0.010932  |
| C  | -1.583160 | 0.000059  | 0.000062  |
| C  | -0.837271 | -1.216604 | -0.010878 |
| C  | 0.536329  | -1.166000 | -0.011346 |
| N  | 1.235383  | 0.000025  | 0.000038  |
| H  | 1.121248  | 2.078511  | 0.021940  |
| H  | -1.325512 | 2.181190  | 0.023767  |
| H  | -1.325591 | -2.181067 | -0.024065 |
| H  | 1.121176  | -2.078471 | -0.021762 |
| N  | -2.934659 | 0.000002  | 0.000134  |
| C  | -3.684564 | -1.260373 | 0.020496  |
| H  | -3.405519 | -1.852471 | 0.896892  |
| H  | -4.747314 | -1.036462 | 0.064604  |
| H  | -3.474743 | -1.838822 | -0.884912 |
| C  | -3.684788 | 1.260253  | -0.020639 |

|   |           |          |           |
|---|-----------|----------|-----------|
| H | -3.406975 | 1.851378 | -0.898109 |
| H | -4.747553 | 1.036103 | -0.063058 |
| H | -3.473908 | 1.839795 | 0.883800  |

**Cu(DMAP)<sub>2</sub><sup>2+</sup>**

|    |           |           |           |
|----|-----------|-----------|-----------|
| Cu | -0.000001 | -0.000597 | -0.341979 |
| C  | 2.710253  | -0.952421 | -0.813724 |
| C  | 4.082747  | -0.962319 | -0.721662 |
| C  | 4.749864  | -0.006326 | 0.100454  |
| C  | 3.913197  | 0.922010  | 0.787241  |
| C  | 2.547999  | 0.857392  | 0.635676  |
| N  | 1.934553  | -0.068815 | -0.140826 |
| H  | 2.191203  | -1.672318 | -1.438625 |
| H  | 4.633079  | -1.705919 | -1.282009 |
| H  | 4.326102  | 1.687867  | 1.429643  |
| H  | 1.900392  | 1.561338  | 1.149128  |
| N  | 6.095473  | 0.022598  | 0.215783  |
| C  | 6.746061  | 1.032797  | 1.051197  |
| H  | 6.388749  | 0.978893  | 2.085127  |
| H  | 7.819817  | 0.851573  | 1.051218  |
| H  | 6.564350  | 2.044851  | 0.670684  |
| C  | 6.922849  | -0.916310 | -0.542481 |
| H  | 6.775952  | -0.794685 | -1.621727 |
| H  | 7.970406  | -0.725850 | -0.314898 |
| H  | 6.694109  | -1.953391 | -0.273425 |
| C  | -2.548390 | -0.857497 | 0.636410  |
| C  | -3.913620 | -0.921391 | 0.787961  |
| C  | -4.749874 | 0.006678  | 0.100329  |
| C  | -4.082321 | 0.961790  | -0.722462 |
| C  | -2.709823 | 0.951217  | -0.814454 |
| N  | -1.934531 | 0.067770  | -0.140861 |
| H  | -1.901106 | -1.561268 | 1.150508  |
| H  | -4.326892 | -1.686454 | 1.431070  |
| H  | -4.632304 | 1.705213  | -1.283387 |
| H  | -2.190437 | 1.670421  | -1.439872 |
| N  | -6.095513 | -0.021750 | 0.215523  |
| C  | -6.922498 | 0.917092  | -0.543230 |
| H  | -6.775450 | 0.794986  | -1.622405 |
| H  | -7.970155 | 0.727010  | -0.315766 |
| H  | -6.693526 | 1.954217  | -0.274549 |
| C  | -6.746421 | -1.030879 | 1.051959  |
| H  | -6.389574 | -0.975704 | 2.086000  |
| H  | -7.820182 | -0.849702 | 1.051268  |
| H  | -6.564514 | -2.043397 | 0.672797  |

|                                                                                     |           |           |           |                                                                                                                                          |           |           |           |                                                                                                                                          |           |           |           |
|-------------------------------------------------------------------------------------|-----------|-----------|-----------|------------------------------------------------------------------------------------------------------------------------------------------|-----------|-----------|-----------|------------------------------------------------------------------------------------------------------------------------------------------|-----------|-----------|-----------|
| <b>Cu(DMAP)(OAc)<sup>+</sup></b>                                                    |           |           |           | H                                                                                                                                        | -2.300528 | 0.080217  | -1.609303 | H                                                                                                                                        | -5.229058 | -1.522728 | -2.077614 |
| Cu                                                                                  | 1.825417  | -0.110547 | -0.535708 | Cl                                                                                                                                       | -2.346996 | -1.760804 | 1.612860  | C                                                                                                                                        | 1.846189  | -0.249853 | 0.661065  |
| C                                                                                   | -0.788395 | 1.152452  | -0.250439 | Cl                                                                                                                                       | -4.590546 | -0.809353 | -0.024779 | H                                                                                                                                        | 1.132987  | -1.051695 | 0.886404  |
| C                                                                                   | -2.156298 | 1.216174  | -0.110412 | Cl                                                                                                                                       | -2.649814 | -2.708594 | -1.153065 | H                                                                                                                                        | 2.097742  | 0.276671  | 1.585317  |
| C                                                                                   | -2.914096 | 0.018505  | 0.055254  | C                                                                                                                                        | 2.029954  | -1.558239 | 0.218901  | C                                                                                                                                        | 3.118338  | -0.887549 | 0.099764  |
| C                                                                                   | -2.166497 | -1.193582 | 0.089720  | C                                                                                                                                        | 3.405043  | -1.540104 | 0.393102  | Cl                                                                                                                                       | 2.774816  | -1.796404 | -1.421266 |
| C                                                                                   | -0.799481 | -1.162575 | -0.061513 | C                                                                                                                                        | 4.150674  | -0.414672 | -0.045446 | Cl                                                                                                                                       | 3.748426  | -2.038244 | 1.341579  |
| N                                                                                   | -0.098698 | -0.014900 | -0.244590 | C                                                                                                                                        | 3.396397  | 0.629351  | -0.642139 | Cl                                                                                                                                       | 4.372233  | 0.362248  | -0.237773 |
| H                                                                                   | -0.204599 | 2.057693  | -0.382813 | C                                                                                                                                        | 2.021570  | 0.497374  | -0.760632 | <b>M<sub>1RA</sub>-2/ M<sub>2RA</sub>-2/ M<sub>1RA</sub>'-2/ M<sub>2RA</sub>'-2</b>                                                      |           |           |           |
| H                                                                                   | -2.632628 | 2.186533  | -0.130489 | N                                                                                                                                        | 1.313409  | -0.569925 | -0.347198 | C                                                                                                                                        | -0.191553 | 1.293240  | -0.313225 |
| H                                                                                   | -2.650134 | -2.151279 | 0.229339  | H                                                                                                                                        | 1.465843  | -2.425478 | 0.558391  | O                                                                                                                                        | -0.375047 | 1.918337  | -1.366292 |
| H                                                                                   | -0.222097 | -2.081348 | -0.041413 | H                                                                                                                                        | 3.887254  | -2.387035 | 0.864400  | N                                                                                                                                        | -0.219220 | 2.211860  | 1.064264  |
| N                                                                                   | -4.260577 | 0.026523  | 0.175491  | H                                                                                                                                        | 3.872762  | 1.530319  | -1.007593 | N                                                                                                                                        | -0.078569 | 3.394983  | 0.806720  |
| C                                                                                   | -4.987488 | -1.226511 | 0.380105  | H                                                                                                                                        | 1.447047  | 1.302493  | -1.215212 | N                                                                                                                                        | 0.041780  | 4.515731  | 0.581901  |
| H                                                                                   | -4.692288 | -1.711295 | 1.318095  | N                                                                                                                                        | 5.505561  | -0.340302 | 0.097787  | O                                                                                                                                        | -1.064213 | 0.218594  | 0.056033  |
| H                                                                                   | -6.054369 | -1.013118 | 0.425163  | C                                                                                                                                        | 6.225050  | 0.847800  | -0.346850 | C                                                                                                                                        | 1.529849  | -0.147272 | 0.895088  |
| H                                                                                   | -4.811634 | -1.926081 | -0.444173 | H                                                                                                                                        | 5.874356  | 1.750399  | 0.169072  | C                                                                                                                                        | 2.763948  | -0.729939 | 1.006093  |
| C                                                                                   | -5.002840 | 1.286922  | 0.142448  | H                                                                                                                                        | 7.285438  | 0.723672  | -0.128769 | C                                                                                                                                        | 3.743610  | -0.545463 | -0.017462 |
| H                                                                                   | -4.798118 | 1.841316  | -0.779749 | H                                                                                                                                        | 6.114674  | 1.008058  | -1.426732 | C                                                                                                                                        | 3.352328  | 0.268647  | -1.122057 |
| H                                                                                   | -6.069323 | 1.069804  | 0.178480  | C                                                                                                                                        | 6.238514  | -1.435531 | 0.722204  | C                                                                                                                                        | 2.096412  | 0.816230  | -1.165606 |
| H                                                                                   | -4.749854 | 1.926125  | 0.996546  | H                                                                                                                                        | 6.096030  | -2.377649 | 0.178917  | N                                                                                                                                        | 1.195412  | 0.611996  | -0.178515 |
| C                                                                                   | 3.989040  | 0.067555  | 0.392309  | H                                                                                                                                        | 7.302441  | -1.200485 | 0.716094  | H                                                                                                                                        | 0.767665  | -0.266476 | 1.652777  |
| O                                                                                   | 2.988815  | 0.261800  | 1.147515  | H                                                                                                                                        | 5.928577  | -1.591848 | 1.763429  | H                                                                                                                                        | 2.970160  | -1.326087 | 1.884195  |
| O                                                                                   | 3.740431  | -0.205741 | -0.825449 | <b>M<sub>1RA</sub>-TS<sub>1</sub>/ M<sub>2RA</sub>'-TS<sub>1</sub>/ M<sub>1RA</sub>'-TS<sub>1</sub>/ M<sub>2RA</sub>'-TS<sub>1</sub></b> |           |           |           | H                                                                                                                                        | 4.026689  | 0.467671  | -1.943385 |
| C                                                                                   | 5.391532  | 0.161724  | 0.881829  | C                                                                                                                                        | 0.445442  | 1.591359  | 0.226466  | H                                                                                                                                        | 1.744861  | 1.437617  | -1.979556 |
| H                                                                                   | 5.914491  | -0.776361 | 0.662719  | O                                                                                                                                        | 0.531808  | 2.018915  | 1.374723  | N                                                                                                                                        | 4.965525  | -1.107246 | 0.057655  |
| H                                                                                   | 5.904612  | 0.966066  | 0.341141  | N                                                                                                                                        | 0.243415  | 2.507527  | -0.938825 | C                                                                                                                                        | 5.944696  | -0.892012 | -1.009245 |
| H                                                                                   | 5.416919  | 0.363977  | 1.954020  | N                                                                                                                                        | -0.327045 | 3.554677  | -0.633104 | H                                                                                                                                        | 6.183419  | 0.171472  | -1.118611 |
| <b>methoxymethane</b>                                                               |           |           |           | N                                                                                                                                        | -0.844936 | 4.552251  | -0.440397 | H                                                                                                                                        | 6.859967  | -1.426077 | -0.760346 |
| C                                                                                   | 1.171829  | 0.197145  | -0.000011 | O                                                                                                                                        | 1.328587  | 0.641936  | -0.303524 | H                                                                                                                                        | 5.573530  | -1.269050 | -1.968413 |
| O                                                                                   | 0.000080  | -0.595880 | -0.000020 | C                                                                                                                                        | -1.485301 | -0.118903 | -0.948921 | C                                                                                                                                        | 5.331443  | -1.939462 | 1.205474  |
| C                                                                                   | -1.172002 | 0.197174  | -0.000010 | C                                                                                                                                        | -2.691523 | -0.780043 | -1.029580 | H                                                                                                                                        | 4.665100  | -2.803931 | 1.295786  |
| H                                                                                   | -1.232893 | 0.839819  | -0.892610 | C                                                                                                                                        | -3.632066 | -0.670794 | 0.035694  | H                                                                                                                                        | 6.348334  | -2.302407 | 1.066891  |
| H                                                                                   | -1.230988 | 0.842575  | 0.890747  | C                                                                                                                                        | -3.237610 | 0.133325  | 1.142672  | H                                                                                                                                        | 5.292486  | -1.366975 | 2.138656  |
| H                                                                                   | -2.029350 | -0.482015 | 0.002016  | C                                                                                                                                        | -2.005010 | 0.751317  | 1.133998  | C                                                                                                                                        | -2.422375 | 0.527036  | -0.140347 |
| H                                                                                   | 2.029548  | -0.481677 | 0.000839  | N                                                                                                                                        | -1.143033 | 0.633548  | 0.112932  | H                                                                                                                                        | -2.586377 | 0.974127  | -1.126055 |
| H                                                                                   | 1.232446  | 0.840646  | -0.892061 | H                                                                                                                                        | -0.753369 | -0.181815 | -1.747668 | H                                                                                                                                        | -2.799025 | 1.211788  | 0.630034  |
| H                                                                                   | 1.231629  | 0.841776  | 0.891357  | H                                                                                                                                        | -2.902606 | -1.370988 | -1.910794 | C                                                                                                                                        | -3.231343 | -0.768104 | -0.057179 |
| <b>M<sub>1RA</sub>-1/M<sub>2RA</sub>'-1/ M<sub>1RA</sub>'-1/ M<sub>2RA</sub>'-1</b> |           |           |           | H                                                                                                                                        | -3.884952 | 0.271585  | 1.998263  | Cl                                                                                                                                       | -2.713323 | -1.936994 | -1.329424 |
| C                                                                                   | -1.634309 | 2.110507  | -0.187616 | H                                                                                                                                        | -1.661598 | 1.369673  | 1.958079  | Cl                                                                                                                                       | -4.972305 | -0.356155 | -0.308378 |
| O                                                                                   | -1.098871 | 2.282228  | -1.260732 | N                                                                                                                                        | -4.833722 | -1.297075 | -0.002854 | Cl                                                                                                                                       | -3.041978 | -1.547191 | 1.561139  |
| N                                                                                   | -1.854042 | 3.084405  | 0.812939  | C                                                                                                                                        | -5.781026 | -1.139349 | 1.098478  | <b>M<sub>1RA</sub>-TS<sub>2</sub>/ M<sub>2RA</sub>'-TS<sub>2</sub>/ M<sub>1RA</sub>'-TS<sub>2</sub>/ M<sub>2RA</sub>'-TS<sub>2</sub></b> |           |           |           |
| N                                                                                   | -1.445726 | 4.224193  | 0.508221  | H                                                                                                                                        | -6.060873 | -0.088738 | 1.238811  | C                                                                                                                                        | -0.145542 | 1.159724  | -0.459447 |
| N                                                                                   | -1.123638 | 5.297064  | 0.359153  | H                                                                                                                                        | -6.683169 | -1.706233 | 0.873230  | O                                                                                                                                        | -0.300260 | 1.942251  | -1.394268 |
| O                                                                                   | -2.133633 | 0.957909  | 0.275975  | H                                                                                                                                        | -5.365473 | -1.515477 | 2.040647  | N                                                                                                                                        | -0.220548 | 2.005430  | 1.157016  |
| C                                                                                   | -1.975436 | -0.170811 | -0.597547 | C                                                                                                                                        | -5.203789 | -2.115330 | -1.155482 | N                                                                                                                                        | -0.105353 | 3.196218  | 0.976777  |
| C                                                                                   | -2.853359 | -1.295083 | -0.053262 | H                                                                                                                                        | -4.503780 | -2.946780 | -1.296810 | N                                                                                                                                        | 0.000396  | 4.333473  | 0.788594  |
| H                                                                                   | -0.922344 | -0.486591 | -0.600501 | H                                                                                                                                        | -6.196697 | -2.531061 | -0.989818 |                                                                                                                                          |           |           |           |



|                                                                                 |          |           |           |                                                                                     |           |           |           |                                                                                 |           |           |           |
|---------------------------------------------------------------------------------|----------|-----------|-----------|-------------------------------------------------------------------------------------|-----------|-----------|-----------|---------------------------------------------------------------------------------|-----------|-----------|-----------|
| C                                                                               | 3.702081 | -3.591630 | 0.329038  | C                                                                                   | -5.43698  | 0.407279  | -0.45192  | H                                                                               | -3.351613 | -2.727917 | -2.278907 |
| H                                                                               | 4.400982 | -2.829225 | 0.656558  | H                                                                                   | -5.59737  | -0.5324   | -0.96941  | C                                                                               | -5.418788 | -4.008197 | 0.107734  |
| H                                                                               | 0.565149 | -3.853540 | -0.949540 | H                                                                                   | -2.89203  | 2.47323   | 0.50569   | H                                                                               | -5.292501 | -3.553979 | 2.213041  |
| C                                                                               | 4.038857 | -4.943573 | 0.386343  | C                                                                                   | -6.51111  | 1.137063  | 0.048351  | H                                                                               | -5.302544 | -4.258601 | -2.032510 |
| C                                                                               | 1.871264 | -5.520387 | -0.522252 | C                                                                                   | -4.98149  | 2.824445  | 0.877119  | H                                                                               | -6.273403 | -4.669338 | 0.219749  |
| H                                                                               | 5.012965 | -5.244406 | 0.761841  | H                                                                                   | -7.52337  | 0.765932  | -0.07858  | H                                                                               | -2.267739 | 1.453193  | -0.544085 |
| C                                                                               | 3.123523 | -5.910938 | -0.039628 | C                                                                                   | -6.28423  | 2.345891  | 0.713592  | H                                                                               | -1.777672 | 1.956733  | 1.110875  |
| H                                                                               | 3.385219 | -6.964484 | 0.004681  | H                                                                                   | -7.12284  | 2.914569  | 1.104628  | C                                                                               | -1.307316 | 3.382809  | -0.434533 |
| H                                                                               | 1.158126 | -6.269972 | -0.853797 | H                                                                                   | -4.80693  | 3.762805  | 1.394401  | Cl                                                                              | -0.019709 | 4.211231  | 0.508501  |
| <b>M<sub>1RA-5</sub> (oH<sub>2</sub>O)/ M<sub>2RA-5</sub> (oH<sub>2</sub>O)</b> |          |           |           | <b>M<sub>1RA-TS3</sub> (iH<sub>2</sub>O)/ M<sub>2RA-TS3</sub> (iH<sub>2</sub>O)</b> |           |           |           | <b>M<sub>1RA-5</sub> (iH<sub>2</sub>O)/ M<sub>2RA-5</sub> (iH<sub>2</sub>O)</b> |           |           |           |
| C                                                                               | -0.60973 | -0.01299  | -0.98428  | C                                                                                   | 0.113273  | 0.373463  | 0.781287  | C                                                                               | -0.378150 | -0.072395 | 0.849090  |
| O                                                                               | -1.7934  | 0.673442  | -0.6527   | O                                                                                   | -1.360131 | -1.081304 | 0.695438  | O                                                                               | -0.578443 | 0.267501  | 2.140195  |
| O                                                                               | -0.49838 | -0.33875  | -2.30403  | H                                                                                   | -0.208662 | -0.281517 | 2.633551  | N                                                                               | 2.208485  | 2.276200  | -2.356993 |
| H                                                                               | -0.86317 | 0.377033  | -2.85518  | O                                                                                   | -0.272779 | 1.226280  | -0.144933 | N                                                                               | 3.351923  | 1.952934  | -2.367606 |
| O                                                                               | -0.53345 | -1.13237  | -0.18543  | C                                                                                   | -1.501654 | 1.945742  | 0.057069  | N                                                                               | 4.493186  | 1.635539  | -2.390087 |
| C                                                                               | 0.403488 | -2.14118  | -0.57667  | C                                                                                   | 2.225233  | -0.707932 | 1.239491  | O                                                                               | -0.549871 | 0.956641  | -0.072821 |
| C                                                                               | 1.446861 | 1.357342  | -1.4549   | C                                                                                   | 3.310129  | -1.425264 | 0.840742  | C                                                                               | 0.009438  | 2.232733  | 0.244636  |
| C                                                                               | 2.433382 | 2.222842  | -1.07284  | C                                                                                   | 3.444354  | -1.862483 | -0.514996 | C                                                                               | -1.063556 | 3.318745  | 0.089390  |
| C                                                                               | 2.481916 | 2.733199  | 0.25974   | C                                                                                   | 2.350650  | -1.555242 | -1.395215 | H                                                                               | 0.820482  | 2.449058  | -0.462018 |
| C                                                                               | 1.439846 | 2.29588   | 1.139176  | C                                                                                   | 1.281258  | -0.845867 | -0.953815 | H                                                                               | 0.380332  | 2.263989  | 1.270416  |
| C                                                                               | 0.482891 | 1.430328  | 0.699047  | N                                                                                   | 1.209050  | -0.408765 | 0.353164  | Cl                                                                              | -0.259271 | 4.906597  | 0.389178  |
| N                                                                               | 0.472248 | 0.963774  | -0.5855   | H                                                                                   | 2.114689  | -0.341079 | 2.246723  | Cl                                                                              | -2.404755 | 3.105005  | 1.277316  |
| H                                                                               | 1.403941 | 0.945716  | -2.45149  | H                                                                                   | 4.071653  | -1.634965 | 1.576747  | Cl                                                                              | -1.756511 | 3.307887  | -1.572953 |
| H                                                                               | 3.175052 | 2.49556   | -1.80914  | H                                                                                   | 2.350399  | -1.879031 | -2.426525 | C                                                                               | 1.827180  | -0.369994 | -0.304643 |
| H                                                                               | 1.393181 | 2.622701  | 2.168359  | H                                                                                   | 0.411761  | -0.630057 | -1.563320 | C                                                                               | 3.096555  | -0.871493 | -0.370800 |
| H                                                                               | -0.30672 | 1.073168  | 1.345917  | N                                                                                   | 4.521437  | -2.529781 | -0.935536 | C                                                                               | 3.613703  | -1.689985 | 0.679150  |
| N                                                                               | 3.448992 | 3.569415  | 0.664528  | C                                                                                   | 4.622287  | -3.002176 | -2.321783 | C                                                                               | 2.717463  | -1.965937 | 1.759712  |
| C                                                                               | 3.46155  | 4.095094  | 2.032795  | H                                                                                   | 4.670121  | -2.160434 | -3.020040 | C                                                                               | 1.464378  | -1.427352 | 1.774447  |
| H                                                                               | 3.631136 | 3.296349  | 2.763273  | H                                                                                   | 5.529635  | -3.593929 | -2.422583 | N                                                                               | 1.017136  | -0.622030 | 0.764815  |
| H                                                                               | 4.265728 | 4.823491  | 2.119329  | H                                                                                   | 3.766632  | -3.632697 | -2.578392 | H                                                                               | 1.425831  | 0.255888  | -1.087788 |
| H                                                                               | 2.517671 | 4.596217  | 2.266401  | C                                                                                   | 5.648897  | -2.766957 | -0.025970 | H                                                                               | 3.693850  | -0.604575 | -1.231230 |
| C                                                                               | 4.553478 | 3.911703  | -0.23737  | H                                                                                   | 5.361883  | -3.441562 | 0.786882  | H                                                                               | 3.011106  | -2.589594 | 2.592120  |
| H                                                                               | 4.194585 | 4.479841  | -1.10198  | H                                                                                   | 6.462314  | -3.221066 | -0.587839 | H                                                                               | 0.773329  | -1.601417 | 2.586832  |
| H                                                                               | 5.273429 | 4.521352  | 0.305159  | H                                                                                   | 5.998536  | -1.820398 | 0.396805  | N                                                                               | 4.866163  | -2.168634 | 0.656054  |
| H                                                                               | 5.055488 | 3.004647  | -0.58904  | C                                                                                   | -2.031244 | -1.383150 | -0.380573 | C                                                                               | 5.760059  | -1.859037 | -0.464939 |
| C                                                                               | -3.02881 | 0.055338  | -0.84048  | O                                                                                   | -1.765232 | -0.961845 | -1.515407 | H                                                                               | 5.835416  | -0.778212 | -0.617696 |
| O                                                                               | -3.15683 | -1.00706  | -1.39855  | N                                                                                   | 3.379970  | 1.960522  | 1.499819  | H                                                                               | 6.751971  | -2.246802 | -0.240376 |
| C                                                                               | -4.12616 | 0.884711  | -0.28903  | N                                                                                   | 4.369224  | 1.561902  | 0.979271  | H                                                                               | 5.403516  | -2.321651 | -1.391658 |
| N                                                                               | 3.376354 | -1.16751  | -1.82216  | N                                                                                   | 5.353097  | 1.154330  | 0.458622  | C                                                                               | 5.357025  | -3.021715 | 1.742729  |
| N                                                                               | 4.213521 | -0.57495  | -1.22266  | H                                                                                   | -1.068068 | -1.730665 | 2.310148  | H                                                                               | 4.747104  | -3.925317 | 1.840941  |
| N                                                                               | 5.054003 | 0.015059  | -0.63285  | O                                                                                   | -0.537385 | -1.481760 | 3.111629  | H                                                                               | 6.379909  | -3.318697 | 1.520067  |
| H                                                                               | 0.008428 | -2.71352  | -1.42002  | H                                                                                   | -1.149787 | -1.431098 | 3.866316  | H                                                                               | 5.350252  | -2.483764 | 2.696456  |
| H                                                                               | 1.384799 | -1.72134  | -0.84212  | C                                                                                   | -3.210146 | -2.305237 | -0.179714 | C                                                                               | -3.457766 | -2.781135 | 0.235105  |
| C                                                                               | 0.583605 | -3.09009  | 0.608789  | C                                                                                   | -3.764240 | -2.539154 | 1.086399  | C                                                                               | -2.528817 | -2.615700 | -0.805001 |
| Cl                                                                              | 1.712476 | -4.39505  | 0.084453  | C                                                                                   | -3.779786 | -2.924207 | -1.301704 | C                                                                               | -2.675998 | -3.341909 | -1.997369 |
| Cl                                                                              | -0.98662 | -3.83083  | 1.099099  | C                                                                                   | -4.865225 | -3.384471 | 1.228872  | C                                                                               | -3.739539 | -4.227215 | -2.147461 |
| Cl                                                                              | 1.289719 | -2.22855  | 2.026066  | H                                                                                   | -3.345082 | -2.045772 | 1.956561  | C                                                                               | -4.662559 | -4.391612 | -1.110135 |
| C                                                                               | -3.90103 | 2.099371  | 0.378276  | C                                                                                   | -4.873256 | -3.776954 | -1.158590 |                                                                                 |           |           |           |

|                                                                                  |           |           |           |                                                                                      |           |           |           |                                                                                  |           |           |           |
|----------------------------------------------------------------------------------|-----------|-----------|-----------|--------------------------------------------------------------------------------------|-----------|-----------|-----------|----------------------------------------------------------------------------------|-----------|-----------|-----------|
| C                                                                                | -4.520184 | -3.669215 | 0.077719  | N                                                                                    | 6.182960  | 0.154545  | -0.680715 | H                                                                                | 4.308017  | 1.327640  | 1.562235  |
| H                                                                                | -3.350587 | -2.220590 | 1.156520  | N                                                                                    | 5.915305  | 0.313894  | -1.825881 | O                                                                                | 2.510850  | -0.100156 | 3.517106  |
| H                                                                                | -1.952140 | -3.204149 | -2.793281 | C                                                                                    | -5.062652 | -2.044840 | -1.293691 | H                                                                                | 1.723930  | -0.383508 | 2.875791  |
| H                                                                                | -3.850588 | -4.787759 | -3.070545 | C                                                                                    | -3.379659 | -3.386665 | -0.177783 | H                                                                                | 3.059143  | -0.877046 | 3.734926  |
| H                                                                                | -5.492339 | -5.082440 | -1.227706 | H                                                                                    | -5.402089 | -1.074341 | -1.639643 | N                                                                                | -5.867710 | -2.605711 | -0.432649 |
| H                                                                                | -5.238434 | -3.796677 | 0.881839  | H                                                                                    | -2.428525 | -3.476277 | 0.334768  | N                                                                                | -5.770066 | -2.193145 | 0.675596  |
| O                                                                                | -0.557623 | -1.493752 | -1.579881 | C                                                                                    | -5.828096 | -3.186866 | -1.515517 | N                                                                                | -5.672779 | -1.793743 | 1.789535  |
| C                                                                                | -1.375270 | -1.687297 | -0.707857 | C                                                                                    | -4.142748 | -4.530685 | -0.414650 | C                                                                                | 1.906624  | 3.986320  | -1.763997 |
| O                                                                                | -1.332344 | -1.073874 | 0.524331  | H                                                                                    | -6.779783 | -3.108019 | -2.032566 | C                                                                                | 1.583353  | 4.001921  | 0.637610  |
| H                                                                                | -3.720559 | 0.309683  | 2.094045  | C                                                                                    | -5.368217 | -4.432623 | -1.077150 | H                                                                                | 1.895587  | 3.441172  | -2.701966 |
| H                                                                                | -1.557228 | 0.222916  | 2.362835  | H                                                                                    | -5.961673 | -5.324589 | -1.255865 | H                                                                                | 1.317269  | 3.485264  | 1.553006  |
| O                                                                                | -3.118459 | 0.041713  | 2.806649  | H                                                                                    | -3.778084 | -5.498360 | -0.083343 | C                                                                                | 2.232429  | 5.340521  | -1.729478 |
| H                                                                                | -3.390211 | 0.567978  | 3.576313  | H                                                                                    | -2.151884 | 1.902559  | -0.349690 | C                                                                                | 1.899212  | 5.360632  | 0.668263  |
| <b>M<sub>1RA-4</sub> (2H<sub>2</sub>O) / M<sub>2RA-4</sub> (2H<sub>2</sub>O)</b> |           |           |           | H                                                                                    | -1.556529 | 2.359919  | 1.281258  | H                                                                                | 2.485653  | 5.860412  | -2.648855 |
| C                                                                                | 0.379822  | 0.888871  | 0.980141  | C                                                                                    | -1.056501 | 3.775080  | -0.264835 | C                                                                                | 2.228382  | 6.030124  | -0.512828 |
| O                                                                                | -2.135575 | -0.833018 | 0.548278  | Cl                                                                                   | -0.674813 | 3.800390  | -2.024657 | H                                                                                | 2.477710  | 7.087058  | -0.486782 |
| O                                                                                | 0.101265  | 1.016300  | 2.152186  | Cl                                                                                   | -2.556163 | 4.725907  | 0.035988  | H                                                                                | 1.885221  | 5.896509  | 1.612773  |
| H                                                                                | -2.208682 | -1.543645 | 1.261639  | Cl                                                                                   | 0.314959  | 4.509508  | 0.645592  | H                                                                                | 2.962089  | -0.967923 | -0.720504 |
| O                                                                                | -0.171307 | 1.533712  | -0.041982 | <b>M<sub>1RA-TS3</sub> (2H<sub>2</sub>O) / M<sub>2RA-TS3</sub> (2H<sub>2</sub>O)</b> |           |           |           | H                                                                                | 2.656749  | -1.552056 | 0.942247  |
| C                                                                                | -1.329001 | 2.347357  | 0.215774  | C                                                                                    | 0.465398  | -0.398459 | 0.757486  | C                                                                                | 2.452662  | -3.053070 | -0.569903 |
| C                                                                                | 2.205069  | -0.596745 | 1.471786  | O                                                                                    | 1.283945  | 1.203251  | 0.497307  | Cl                                                                               | 1.924790  | -3.219730 | -2.283773 |
| C                                                                                | 3.187354  | -1.462919 | 1.119073  | O                                                                                    | 0.664313  | -0.624588 | 1.970963  | Cl                                                                               | 4.192851  | -3.509529 | -0.437908 |
| C                                                                                | 3.409833  | -1.799795 | -0.259429 | H                                                                                    | 2.756489  | 1.541390  | 1.365920  | Cl                                                                               | 1.464522  | -4.149058 | 0.460893  |
| C                                                                                | 2.577356  | -1.123109 | -1.214571 | O                                                                                    | 0.974783  | -1.190315 | -0.228775 | <b>M<sub>1RA-5</sub> (2H<sub>2</sub>O) / M<sub>2RA-5</sub> (2H<sub>2</sub>O)</b> |           |           |           |
| C                                                                                | 1.610822  | -0.259929 | -0.810764 | C                                                                                    | 2.325552  | -1.600199 | -0.095618 | C                                                                                | -0.256794 | 0.094593  | 0.626550  |
| N                                                                                | 1.401623  | 0.008380  | 0.527595  | C                                                                                    | -1.722423 | 0.469400  | 1.353250  | O                                                                                | -1.157997 | -1.021202 | 0.508134  |
| H                                                                                | 2.010014  | -0.326398 | 2.499294  | C                                                                                    | -3.010638 | 0.827242  | 1.093592  | O                                                                                | -0.266575 | 0.449310  | 1.922752  |
| H                                                                                | 3.790787  | -1.887356 | 1.908099  | C                                                                                    | -3.564942 | 0.659179  | -0.216644 | H                                                                                | -4.854156 | -1.016453 | 1.361048  |
| H                                                                                | 2.691312  | -1.287705 | -2.276262 | C                                                                                    | -2.694809 | 0.078945  | -1.192322 | O                                                                                | -0.593365 | 1.110175  | -0.262596 |
| H                                                                                | 0.964903  | 0.249280  | -1.509908 | C                                                                                    | -1.408435 | -0.248836 | -0.876852 | C                                                                                | -1.813604 | 1.785198  | 0.000871  |
| N                                                                                | 4.335297  | -2.682076 | -0.629835 | N                                                                                    | -0.915042 | -0.062729 | 0.385815  | C                                                                                | 1.779562  | -1.164452 | 1.106718  |
| C                                                                                | 4.586425  | -2.952110 | -2.052747 | H                                                                                    | -1.273874 | 0.574709  | 2.330697  | C                                                                                | 3.034401  | -1.624996 | 0.837732  |
| H                                                                                | 4.996903  | -2.059000 | -2.534816 | H                                                                                    | -3.596178 | 1.232342  | 1.906327  | C                                                                                | 3.711997  | -1.232619 | -0.360800 |
| H                                                                                | 5.306519  | -3.764035 | -2.130271 | H                                                                                    | -3.028461 | -0.116086 | -2.201458 | C                                                                                | 3.003166  | -0.324621 | -1.208396 |
| H                                                                                | 3.665255  | -3.256506 | -2.555810 | H                                                                                    | -0.725385 | -0.665369 | -1.598815 | C                                                                                | 1.741842  | 0.090092  | -0.891894 |
| C                                                                                | 5.226983  | -3.297776 | 0.363735  | N                                                                                    | -4.822029 | 1.021148  | -0.505048 | N                                                                                | 1.126537  | -0.317610 | 0.256054  |
| H                                                                                | 4.648248  | -3.773378 | 1.159339  | C                                                                                    | -5.395585 | 0.745669  | -1.826894 | H                                                                                | 1.249830  | -1.434555 | 2.009560  |
| H                                                                                | 5.823245  | -4.061101 | -0.131677 | H                                                                                    | -5.548364 | -0.330687 | -1.963475 | H                                                                                | 3.497155  | -2.281079 | 1.560735  |
| H                                                                                | 5.891168  | -2.538751 | 0.790250  | H                                                                                    | -6.356696 | 1.251683  | -1.901844 | H                                                                                | 3.439336  | 0.049047  | -2.123562 |
| C                                                                                | -3.042969 | -0.878881 | -0.430036 | H                                                                                    | -4.747135 | 1.127763  | -2.619032 | H                                                                                | 1.182645  | 0.758992  | -1.526279 |
| O                                                                                | -3.195824 | 0.089510  | -1.163769 | C                                                                                    | -5.711593 | 1.527669  | 0.547096  | N                                                                                | 4.936337  | -1.682951 | -0.667623 |
| C                                                                                | -3.838372 | -2.134342 | -0.613128 | H                                                                                    | -5.270064 | 2.396679  | 1.042564  | C                                                                                | 5.644565  | -1.163323 | -1.843183 |
| O                                                                                | -2.067877 | -2.463809 | 2.576043  | H                                                                                    | -6.650097 | 1.835743  | 0.089681  | H                                                                                | 5.830090  | -0.089447 | -1.733299 |
| H                                                                                | -1.555053 | -1.924861 | 3.233160  | H                                                                                    | -5.914059 | 0.744990  | 1.287068  | H                                                                                | 6.598924  | -1.678998 | -1.931872 |
| H                                                                                | -2.936053 | -2.610653 | 2.981333  | C                                                                                    | 1.221787  | 1.849671  | -0.666144 | H                                                                                | 5.070297  | -1.344688 | -2.756443 |
| O                                                                                | -0.625036 | -0.866591 | 4.209949  | O                                                                                    | 0.895083  | 1.334613  | -1.729735 | C                                                                                | 5.659526  | -2.568264 | 0.251969  |
| H                                                                                | -0.356040 | -0.152291 | 3.605601  | C                                                                                    | 1.588538  | 3.305007  | -0.579626 | H                                                                                | 5.052517  | -3.440629 | 0.508540  |
| H                                                                                | -1.179983 | -0.432015 | 4.875955  | O                                                                                    | 3.492628  | 1.570241  | 2.033085  | H                                                                                | 6.565038  | -2.917865 | -0.241217 |
| N                                                                                | 6.453449  | 0.008950  | 0.465776  | H                                                                                    | 3.073164  | 0.625216  | 2.938607  | H                                                                                | 5.934804  | -2.030068 | 1.165897  |

|                                                                                                           |           |           |           |                                                                       |           |           |           |                                             |           |           |           |
|-----------------------------------------------------------------------------------------------------------|-----------|-----------|-----------|-----------------------------------------------------------------------|-----------|-----------|-----------|---------------------------------------------|-----------|-----------|-----------|
| C                                                                                                         | -1.360215 | -1.669365 | -0.687718 | H                                                                     | -5.051233 | 2.204231  | -2.166727 | Cl                                          | 3.591112  | -1.973047 | 1.185569  |
| O                                                                                                         | -0.761447 | -1.396448 | -1.705297 | C                                                                     | -5.868264 | 1.883313  | 1.024337  | C                                           | -2.220578 | -0.304356 | 1.523558  |
| C                                                                                                         | -2.389527 | -2.731665 | -0.556295 | H                                                                     | -5.386747 | 2.619874  | 1.673774  | C                                           | -3.558607 | -0.443753 | 1.281204  |
| O                                                                                                         | -4.712370 | -0.144941 | 1.764571  | H                                                                     | -6.811483 | 2.301411  | 0.677375  | C                                           | -4.021143 | -0.860757 | -0.005004 |
| H                                                                                                         | -3.245935 | -0.150776 | 2.668059  | H                                                                     | -6.071653 | 0.970319  | 1.595027  | C                                           | -3.013120 | -1.081394 | -0.990150 |
| H                                                                                                         | -4.669139 | 0.464260  | 1.010728  | C                                                                     | 1.348278  | 1.810487  | -0.813709 | C                                           | -1.690075 | -0.908596 | -0.683323 |
| O                                                                                                         | -2.406091 | -0.198230 | 3.190346  | O                                                                     | 1.012996  | 1.357296  | -1.902153 | N                                           | -1.286363 | -0.551436 | 0.564547  |
| H                                                                                                         | -1.122025 | 0.161936  | 2.396965  | C                                                                     | 2.035377  | 3.140931  | -0.692317 | H                                           | -1.840242 | -0.002901 | 2.489196  |
| H                                                                                                         | -2.549448 | 0.350089  | 3.976925  | O                                                                     | 3.557824  | -0.921515 | 3.545590  | H                                           | -4.246268 | -0.239219 | 2.089594  |
| N                                                                                                         | 5.748282  | 1.795403  | 0.203211  | H                                                                     | 2.686243  | -1.570949 | 3.535647  | H                                           | -3.264500 | -1.373887 | -1.999959 |
| N                                                                                                         | 5.773437  | 1.127515  | 1.183928  | H                                                                     | 4.300145  | -1.355420 | 3.087313  | H                                           | -0.908912 | -1.036500 | -1.415962 |
| N                                                                                                         | 5.796634  | 0.471248  | 2.172668  | O                                                                     | 1.497697  | -2.252487 | 3.486831  | N                                           | -5.328667 | -1.028673 | -0.270037 |
| C                                                                                                         | -2.730717 | -3.453246 | -1.710263 | H                                                                     | 0.993230  | -1.768485 | 2.778116  | C                                           | -5.765092 | -1.471731 | -1.596350 |
| C                                                                                                         | -3.016693 | -3.027841 | 0.665640  | H                                                                     | 1.586432  | -3.176918 | 3.203234  | H                                           | -5.302264 | -2.427694 | -1.861743 |
| H                                                                                                         | -2.235759 | -3.218547 | -2.646448 | N                                                                     | -5.509812 | -1.956989 | -0.971427 | H                                           | -6.845266 | -1.605152 | -1.585393 |
| H                                                                                                         | -2.742016 | -2.487648 | 1.564065  | N                                                                     | -5.605847 | -1.824087 | 0.204016  | H                                           | -5.511792 | -0.732944 | -2.364562 |
| C                                                                                                         | -3.694955 | -4.455970 | -1.645953 | N                                                                     | -5.699701 | -1.705810 | 1.381398  | C                                           | -6.336218 | -0.758089 | 0.758904  |
| C                                                                                                         | -3.982051 | -4.032149 | 0.722444  | C                                                                     | 2.595217  | 3.705454  | -1.848012 | H                                           | -6.276588 | 0.279044  | 1.104878  |
| H                                                                                                         | -3.956756 | -5.012056 | -2.540860 | C                                                                     | 2.107136  | 3.839986  | 0.521834  | H                                           | -7.324733 | -0.921985 | 0.334050  |
| C                                                                                                         | -4.323218 | -4.744503 | -0.431074 | H                                                                     | 2.523843  | 3.162538  | -2.784505 | H                                           | -6.211749 | -1.425105 | 1.618730  |
| H                                                                                                         | -5.075683 | -5.526141 | -0.382091 | H                                                                     | 1.660163  | 3.419385  | 1.415309  | C                                           | 1.551915  | 3.697628  | 1.009991  |
| H                                                                                                         | -4.464120 | -4.262228 | 1.667616  | C                                                                     | 3.234554  | 4.941938  | -1.787365 | C                                           | 1.241058  | 3.043539  | -0.189250 |
| H                                                                                                         | -2.644720 | 1.299472  | -0.520878 | C                                                                     | 2.739541  | 5.082581  | 0.577813  | C                                           | 1.982993  | 3.329007  | -1.339025 |
| H                                                                                                         | -2.021761 | 1.824280  | 1.072312  | H                                                                     | 3.673622  | 5.368778  | -2.684321 | C                                           | 3.028255  | 4.255116  | -1.294323 |
| C                                                                                                         | -1.693363 | 3.225663  | -0.510866 | C                                                                     | 3.307661  | 5.632740  | -0.573892 | C                                           | 3.336747  | 4.903847  | -0.097441 |
| Cl                                                                                                        | -1.380262 | 3.252945  | -2.285561 | H                                                                     | 3.803276  | 6.598125  | -0.527171 | C                                           | 2.595733  | 4.621172  | 1.055257  |
| Cl                                                                                                        | -3.263837 | 4.047983  | -0.174262 | H                                                                     | 2.785756  | 5.621759  | 1.519376  | H                                           | 0.976477  | 3.482332  | 1.903819  |
| Cl                                                                                                        | -0.368164 | 4.100446  | 0.334331  | H                                                                     | 2.472481  | -0.904501 | -1.194844 | H                                           | 1.730416  | 2.817302  | -2.261973 |
|                                                                                                           |           |           |           | H                                                                     | 2.367525  | -1.529078 | 0.479007  | H                                           | 3.598454  | 4.469606  | -2.194080 |
| <b>M<sub>1RA</sub>-TS<sub>3</sub> (3H<sub>2</sub>O)/ M<sub>2RA</sub>-TS<sub>3</sub> (3H<sub>2</sub>O)</b> |           |           |           | C                                                                     | 1.910915  | -2.967397 | -1.045010 | H                                           | 4.147734  | 5.625896  | -0.060347 |
| C                                                                                                         | 0.253803  | -0.242392 | 0.614767  | Cl                                                                    | 1.161914  | -3.046178 | -2.681048 | H                                           | 2.830823  | 5.124000  | 1.989372  |
| O                                                                                                         | 1.156845  | 1.200489  | 0.356110  | Cl                                                                    | 3.633657  | -3.491636 | -1.156159 | O                                           | -0.164862 | 1.491894  | -1.380102 |
| O                                                                                                         | 0.538114  | -0.534464 | 1.790578  | Cl                                                                    | 1.020531  | -4.082647 | 0.057817  | C                                           | 0.111144  | 2.035268  | -0.311357 |
| H                                                                                                         | 3.326719  | -0.001226 | 3.055138  | O                                                                     | 2.962283  | 1.225835  | 2.468971  | O                                           | 0.493266  | 1.009079  | 0.943875  |
| O                                                                                                         | 0.559764  | -1.078185 | -0.444226 | H                                                                     | 2.287042  | 1.154921  | 1.751588  | H                                           | 1.039199  | -0.330256 | 2.594409  |
| C                                                                                                         | 1.897765  | -1.531955 | -0.506769 | H                                                                     | 3.710968  | 1.713017  | 2.087857  |                                             |           |           |           |
| C                                                                                                         | -1.894082 | 0.568564  | 1.448051  |                                                                       |           |           |           | <b>M<sub>1RA</sub>-6/ M<sub>2RA</sub>-6</b> |           |           |           |
| C                                                                                                         | -3.177288 | 1.014231  | 1.316920  | <b>M<sub>1RA</sub>-TS<sub>4</sub>/ M<sub>2RA</sub>-TS<sub>4</sub></b> |           |           |           | C                                           | -0.876702 | -1.591199 | 1.639540  |
| C                                                                                                         | -3.773155 | 1.141510  | 0.022905  | C                                                                     | 0.187583  | -0.286393 | 0.896085  | O                                           | -1.372739 | -0.738277 | 2.548008  |
| C                                                                                                         | -2.951652 | 0.761595  | -1.084236 | O                                                                     | 0.355805  | -0.862390 | 2.152906  | N                                           | 3.247718  | -0.532115 | 1.635194  |
| C                                                                                                         | -1.670815 | 0.328663  | -0.887758 | N                                                                     | -1.177294 | 2.760243  | 0.468548  | N                                           | 2.310275  | 0.131744  | 2.103849  |
| N                                                                                                         | -1.139937 | 0.226215  | 0.365961  | N                                                                     | -2.177553 | 2.713454  | -0.219576 | N                                           | 1.491287  | 0.711146  | 2.630168  |
| H                                                                                                         | -1.408620 | 0.450241  | 2.406733  | N                                                                     | -3.126995 | 2.668427  | -0.871752 | O                                           | -1.768188 | -1.913605 | 0.689423  |
| H                                                                                                         | -3.724708 | 1.256696  | 2.216419  | O                                                                     | 0.965337  | -0.943957 | -0.091736 | C                                           | -3.043928 | -1.254990 | 0.664044  |
| H                                                                                                         | -3.319063 | 0.808454  | -2.099629 | C                                                                     | 1.126873  | -2.346990 | 0.000155  | C                                           | -3.867675 | -1.906598 | -0.446209 |
| H                                                                                                         | -1.014268 | 0.061339  | -1.701360 | C                                                                     | 2.616082  | -2.698518 | -0.144276 | H                                           | -2.909207 | -0.189293 | 0.438059  |
| N                                                                                                         | -5.028776 | 1.585590  | -0.140527 | H                                                                     | 0.591952  | -2.849100 | -0.812874 | H                                           | -3.570939 | -1.386791 | 1.611188  |
| C                                                                                                         | -5.642730 | 1.601033  | -1.472034 | H                                                                     | 0.781416  | -2.737390 | 0.959060  | Cl                                          | -5.464939 | -1.069293 | -0.485545 |
| H                                                                                                         | -5.738299 | 0.581508  | -1.861684 | Cl                                                                    | 2.765080  | -4.497982 | -0.077294 | Cl                                          | -3.061106 | -1.720147 | -2.046597 |
| H                                                                                                         | -6.634330 | 2.043952  | -1.394705 | Cl                                                                    | 3.260059  | -2.114687 | -1.724499 | Cl                                          | -4.124737 | -3.662607 | -0.120107 |

|                                                                       |           |           |           |                                             |           |           |           |                          |           |           |           |
|-----------------------------------------------------------------------|-----------|-----------|-----------|---------------------------------------------|-----------|-----------|-----------|--------------------------|-----------|-----------|-----------|
| C                                                                     | -2.425464 | 3.045593  | -0.069357 | H                                           | 3.665410  | 0.093199  | 0.048129  | N                        | -2.859717 | 2.473153  | 0.478179  |
| C                                                                     | -1.705453 | 4.226838  | -0.165063 | H                                           | 1.697666  | -1.126721 | -0.769332 | H                        | -0.969075 | 1.914741  | 1.066067  |
| C                                                                     | -0.290439 | 4.177031  | -0.264785 | N                                           | 6.027190  | -1.080128 | 0.706967  | H                        | -0.030128 | 4.210701  | 0.836078  |
| C                                                                     | 0.280988  | 2.878161  | -0.258805 | C                                           | 6.043229  | 0.371487  | 0.871275  | H                        | -4.000954 | 5.476271  | -0.434780 |
| C                                                                     | -0.544141 | 1.768557  | -0.160755 | H                                           | 5.316084  | 0.700805  | 1.623012  | H                        | -4.726153 | 3.140168  | -0.131034 |
| N                                                                     | -1.886304 | 1.812687  | -0.065078 | H                                           | 7.035784  | 0.680194  | 1.196783  | N                        | -1.475024 | 6.352469  | 0.013469  |
| H                                                                     | -3.510667 | 3.094819  | 0.006923  | H                                           | 5.818754  | 0.881757  | -0.072221 | C                        | -2.375923 | 7.407713  | -0.452710 |
| H                                                                     | -2.238685 | 5.169211  | -0.164027 | C                                           | 7.214455  | -1.857373 | 1.052342  | H                        | -3.203399 | 7.563048  | 0.248536  |
| H                                                                     | 1.350085  | 2.727509  | -0.332543 | H                                           | 7.604372  | -2.402277 | 0.184447  | H                        | -1.816915 | 8.338062  | -0.536450 |
| H                                                                     | -0.089506 | 0.780237  | -0.162781 | H                                           | 7.990239  | -1.180295 | 1.407708  | H                        | -2.791728 | 7.166391  | -1.436974 |
| N                                                                     | 0.472703  | 5.304556  | -0.360226 | H                                           | 7.001653  | -2.581410 | 1.847776  | C                        | -0.079635 | 6.681138  | 0.310030  |
| C                                                                     | 1.920052  | 5.197297  | -0.501153 | H                                           | -0.463877 | -3.502957 | -1.070952 | H                        | 0.606041  | 6.117156  | -0.332131 |
| H                                                                     | 2.202063  | 4.655272  | -1.413051 | H                                           | 1.449695  | -3.583812 | -1.167553 | H                        | 0.078864  | 7.743464  | 0.132833  |
| H                                                                     | 2.346964  | 6.198291  | -0.555082 | O                                           | 0.485341  | -4.059892 | -1.553119 | H                        | 0.164516  | 6.466030  | 1.356141  |
| H                                                                     | 2.370877  | 4.681087  | 0.355161  | H                                           | 0.456072  | -3.897257 | -2.509274 | H                        | -3.197542 | 1.465235  | 0.595720  |
| C                                                                     | -0.160859 | 6.617198  | -0.402644 | N                                           | 2.420858  | 4.073094  | 0.309312  | N                        | 6.520450  | 1.046714  | -0.676578 |
| H                                                                     | -0.760046 | 6.802779  | 0.496863  | N                                           | 3.594094  | 3.751357  | 0.565243  | N                        | 5.969942  | 2.101566  | -1.037831 |
| H                                                                     | 0.611426  | 7.384105  | -0.457118 | N                                           | 4.679965  | 3.562819  | 0.826913  | N                        | 5.565316  | 3.105504  | -1.371320 |
| H                                                                     | -0.815202 | 6.727170  | -1.277273 | C                                           | -3.506347 | -1.852515 | 0.447900  | C                        | 6.320775  | -1.277680 | -0.008844 |
| C                                                                     | 5.334441  | -2.035413 | 0.562777  | H                                           | -3.792134 | -2.744348 | -0.114344 | C                        | 5.541124  | -2.413606 | 0.264550  |
| C                                                                     | 4.468547  | -1.341294 | -0.297564 | H                                           | -3.118104 | -2.156651 | 1.425115  | C                        | 7.716860  | -1.338978 | 0.127013  |
| C                                                                     | 4.657865  | -1.413763 | -1.687616 | C                                           | -4.761052 | -1.004205 | 0.672881  | C                        | 6.152011  | -3.596654 | 0.669132  |
| C                                                                     | 5.701331  | -2.171657 | -2.209892 | Cl                                          | -4.383894 | 0.478251  | 1.627015  | H                        | 4.463576  | -2.352953 | 0.155722  |
| C                                                                     | 6.562835  | -2.860732 | -1.349931 | Cl                                          | -5.948177 | -2.008860 | 1.592231  | C                        | 8.322838  | -2.526609 | 0.532314  |
| C                                                                     | 6.378274  | -2.791758 | 0.033632  | Cl                                          | -5.496390 | -0.517938 | -0.900989 | H                        | 8.320817  | -0.463379 | -0.083511 |
| H                                                                     | 5.190750  | -1.982107 | 1.636167  | C                                           | 0.201775  | 3.432017  | -0.432506 | C                        | 7.543103  | -3.654294 | 0.803507  |
| H                                                                     | 3.981799  | -0.873464 | -2.341470 | C                                           | -0.207841 | 4.766435  | -0.274716 | H                        | 5.547308  | -4.473308 | 0.880207  |
| H                                                                     | 5.845283  | -2.226281 | -3.284554 | C                                           | -0.718506 | 2.461723  | -0.865196 | H                        | 9.402436  | -2.572474 | 0.636959  |
| H                                                                     | 7.377435  | -3.451538 | -1.758589 | C                                           | -1.525316 | 5.125655  | -0.550420 | H                        | 8.018818  | -4.578109 | 1.119560  |
| H                                                                     | 7.047446  | -3.327089 | 0.700094  | H                                           | 0.501205  | 5.515198  | 0.060688  | H                        | -4.406986 | -3.276415 | 1.807812  |
| O                                                                     | 2.579651  | 0.118581  | -0.498523 | C                                           | -2.033360 | 2.829818  | -1.137130 | H                        | -4.822697 | -1.852278 | 0.804936  |
| C                                                                     | 3.346231  | -0.517350 | 0.205288  | H                                           | -0.406078 | 1.428153  | -0.980905 | C                        | -4.087032 | -3.549895 | -0.284382 |
| O                                                                     | 0.239802  | -2.055986 | 1.642615  | C                                           | -2.438303 | 4.159296  | -0.981704 | Cl                       | -3.622779 | -2.616959 | -1.756783 |
| H                                                                     | -0.659977 | -0.536486 | 3.181685  | H                                           | -1.839544 | 6.157735  | -0.428949 | Cl                       | -5.754399 | -4.218851 | -0.509049 |
|                                                                       |           |           |           | H                                           | -2.743436 | 2.078221  | -1.467566 | Cl                       | -2.929631 | -4.923796 | -0.085262 |
|                                                                       |           |           |           | H                                           | -3.465193 | 4.441624  | -1.195269 |                          |           |           |           |
| <b>M<sub>1RA</sub>-TS<sub>5</sub>/ M<sub>2RA</sub>-TS<sub>5</sub></b> |           |           |           | <b>M<sub>1RA</sub>-7/ M<sub>2RA</sub>-7</b> |           |           |           | <b>M<sub>1RA</sub>-8</b> |           |           |           |
| C                                                                     | -1.462090 | -1.711849 | -0.783492 | C                                           | -4.094556 | -2.650494 | 0.964656  | C                        | 0.478017  | -1.665035 | -0.947535 |
| O                                                                     | -1.429277 | -2.980362 | -0.560950 | C                                           | -2.616779 | -0.729076 | 1.055399  | O                        | 1.611533  | -2.085518 | -1.183480 |
| O                                                                     | -2.565260 | -1.064149 | -0.261077 | C                                           | -3.639991 | -0.043144 | 0.774606  | N                        | 0.540813  | 2.507006  | -2.061429 |
| C                                                                     | 1.589275  | 3.000287  | -0.154153 | O                                           | -2.818063 | -2.128839 | 1.217808  | N                        | -0.077748 | 1.658934  | -2.737361 |
| O                                                                     | 2.009738  | 1.863955  | -0.293745 | O                                           | -2.818063 | -2.128839 | 1.217808  | N                        | -0.544304 | 0.928770  | -3.462131 |
| O                                                                     | -0.652333 | -1.018803 | -1.391292 | C                                           | 5.619480  | -0.044457 | -0.434480 | O                        | -0.604039 | -2.515316 | -0.929859 |
| C                                                                     | 3.692807  | -3.695647 | -0.393920 | O                                           | 4.413752  | 0.062685  | -0.572200 | C                        | -0.370562 | -3.906941 | -1.091278 |
| C                                                                     | 4.852090  | -3.113297 | 0.074882  | O                                           | -1.446189 | -0.381818 | 1.234483  | C                        | -0.716907 | -4.659812 | 0.203144  |
| C                                                                     | 4.908351  | -1.702698 | 0.256353  | C                                           | -1.566053 | 2.761404  | 0.746274  | H                        | 0.674532  | -4.093347 | -1.342219 |
| C                                                                     | 3.724414  | -0.980905 | -0.062147 | C                                           | -1.072168 | 4.034193  | 0.609070  | H                        | -1.020185 | -4.274017 | -1.889274 |
| C                                                                     | 2.614035  | -1.656900 | -0.523174 | C                                           | -1.926346 | 5.090331  | 0.169141  | Cl                       | -0.415329 | -6.412327 | -0.085578 |
| N                                                                     | 2.581458  | -2.994968 | -0.694290 | C                                           | -3.284433 | 4.739262  | -0.100206 | Cl                       | 0.313009  | -4.091289 | 1.568639  |
| H                                                                     | 3.635935  | -4.770533 | -0.541419 | C                                           | -3.703911 | 3.443374  | 0.063520  | Cl                       | -2.449404 | -4.421624 | 0.643023  |
| H                                                                     | 5.703022  | -3.744513 | 0.293751  |                                             |           |           |           |                          |           |           |           |

|    |           |           |           |                                |           |           |           |                            |           |           |           |
|----|-----------|-----------|-----------|--------------------------------|-----------|-----------|-----------|----------------------------|-----------|-----------|-----------|
| C  | 1.849213  | 4.542598  | -0.715619 | H                              | -7.800456 | 0.960368  | 2.622691  | H                          | 8.106971  | -2.366485 | 2.057373  |
| C  | 0.831846  | 3.816310  | -0.068653 | C                              | -8.303862 | 2.096300  | -0.416454 | C                          | 8.407123  | -2.227325 | -1.190220 |
| C  | 0.496900  | 4.109705  | 1.266554  | H                              | -8.355599 | 1.271159  | -1.134042 | H                          | 8.751994  | -1.215159 | -1.428168 |
| C  | 1.174493  | 5.117130  | 1.944284  | H                              | -9.305142 | 2.275797  | -0.028530 | H                          | 9.278165  | -2.855272 | -1.012260 |
| C  | 2.186568  | 5.836006  | 1.298287  | H                              | -7.964804 | 2.997468  | -0.940421 | H                          | 7.862916  | -2.625190 | -2.053586 |
| C  | 2.522431  | 5.548014  | -0.028513 | <b>M<sub>1RA</sub>-8 (OAc)</b> |           |           | C         | -5.754020                  | 0.806233  | 1.387468  |           |
| H  | 2.106905  | 4.319504  | -1.744929 | C                              | 0.600610  | 1.277037  | 0.243020  | H                          | -5.809811 | 1.898231  | 1.415664  |
| H  | -0.289001 | 3.545850  | 1.756747  | O                              | 1.788179  | 1.566415  | 0.330593  | H                          | -6.207745 | 0.385975  | 2.286427  |
| H  | 0.916874  | 5.343886  | 2.974030  | N                              | -1.926378 | -2.972803 | 1.383960  | H                          | -6.316029 | 0.471433  | 0.508536  |
| H  | 2.714033  | 6.622563  | 1.829980  | N                              | -1.333429 | -2.082279 | 2.026751  | C                          | -4.318299 | 0.352967  | 1.261439  |
| H  | 3.307652  | 6.108154  | -0.526277 | N                              | -0.767665 | -1.387178 | 2.713630  | O                          | -3.825677 | -0.528684 | 1.970427  |
| O  | -0.836924 | 2.130091  | -0.214224 | O                              | -0.391698 | 2.237052  | 0.479831  | O                          | -3.639250 | 0.965039  | 0.318168  |
| C  | 0.099530  | 2.746038  | -0.757100 | C                              | -0.010807 | 3.580038  | 0.758207  | <b>M<sub>1RA</sub>-TS6</b> |           |           |           |
| O  | 0.157443  | -0.444163 | -0.715847 | C                              | -0.371660 | 4.507045  | -0.413709 | C                          | 0.476480  | -1.795085 | -0.898748 |
| H  | 3.086879  | -1.226940 | -0.807798 | H                              | 1.065394  | 3.626325  | 0.930440  | O                          | 1.607038  | -2.220741 | -1.142681 |
| Cu | -1.605371 | 0.192149  | -0.347509 | H                              | -0.551360 | 3.911009  | 1.646995  | N                          | 0.684813  | 2.427504  | -1.968994 |
| C  | 4.433954  | -1.151545 | 0.757450  | Cl                             | 0.158545  | 6.170315  | 0.033939  | N                          | -0.032104 | 1.128229  | -2.851478 |
| C  | 5.648201  | -0.711483 | 1.212723  | Cl                             | 0.470004  | 3.992715  | -1.920753 | N                          | -0.045036 | 0.536008  | -3.788242 |
| C  | 6.496235  | 0.063189  | 0.360737  | Cl                             | -2.147974 | 4.508047  | -0.709374 | O                          | -0.614071 | -2.631837 | -0.903689 |
| C  | 6.001884  | 0.335868  | -0.953178 | C                              | -3.559861 | -3.593710 | -1.867478 | C                          | -0.395818 | -4.023497 | -1.086819 |
| C  | 4.775187  | -0.136615 | -1.338931 | C                              | -3.027176 | -3.797170 | -0.581264 | C                          | -0.740686 | -4.792160 | 0.198777  |
| N  | 4.006474  | -0.866800 | -0.495844 | C                              | -3.118244 | -5.063463 | 0.025308  | H                          | 0.645487  | -4.217191 | -1.347839 |
| H  | 3.763081  | -1.743214 | 1.368607  | C                              | -3.737057 | -6.110634 | -0.651118 | H                          | -1.054912 | -4.371627 | -1.885456 |
| H  | 5.942071  | -0.965764 | 2.221514  | C                              | -4.265688 | -5.903977 | -1.929190 | Cl                         | -0.458192 | -6.542972 | -0.118937 |
| H  | 6.577796  | 0.912850  | -1.663141 | C                              | -4.176871 | -4.646028 | -2.535602 | Cl                         | 0.303974  | -4.254044 | 1.564995  |
| H  | 4.365158  | 0.046302  | -2.324898 | H                              | -3.485861 | -2.614793 | -2.328271 | Cl                         | -2.467533 | -4.543778 | 0.654703  |
| N  | 7.696399  | 0.511267  | 0.773941  | H                              | -2.707743 | -5.222093 | 1.016282  | C                          | 0.497303  | 5.057550  | -0.779172 |
| C  | 8.547399  | 1.291663  | -0.127623 | H                              | -3.807386 | -7.087356 | -0.182826 | C                          | 0.871284  | 3.780953  | -0.327894 |
| H  | 8.040700  | 2.206120  | -0.453719 | H                              | -4.747990 | -6.723986 | -2.453188 | C                          | 1.896358  | 3.610664  | 0.619837  |
| H  | 9.456904  | 1.572660  | 0.400781  | H                              | -4.588855 | -4.488916 | -3.527546 | C                          | 2.509942  | 4.738100  | 1.154379  |
| H  | 8.825888  | 0.709026  | -1.012759 | O                              | -2.249070 | -1.557453 | -0.448318 | C                          | 2.123028  | 6.016507  | 0.729410  |
| C  | 8.177083  | 0.205636  | 2.123529  | C                              | -2.379478 | -2.666101 | 0.100364  | C                          | 1.121356  | 6.176747  | -0.232841 |
| H  | 8.273317  | -0.875088 | 2.274998  | O                              | 0.048866  | 0.159988  | -0.034434 | H                          | -0.274761 | 5.160741  | -1.534718 |
| H  | 9.156453  | 0.660788  | 2.259971  | H                              | 3.153045  | 0.456775  | 0.130746  | H                          | 2.189978  | 2.613908  | 0.933219  |
| H  | 7.499213  | 0.608790  | 2.883570  | Cu                             | -1.876412 | 0.385434  | 0.115193  | H                          | 3.293748  | 4.625255  | 1.896720  |
| C  | -4.289189 | 0.948713  | -1.033017 | C                              | 4.798916  | -0.065292 | -1.015879 | H                          | 2.613078  | 6.891189  | 1.146540  |
| C  | -5.598864 | 1.322239  | -0.847692 | C                              | 5.975433  | -0.763480 | -1.081507 | H                          | 0.834524  | 7.170023  | -0.562959 |
| C  | -6.133611 | 1.411863  | 0.472101  | C                              | 6.414695  | -1.537312 | 0.037921  | O                          | -0.784200 | 1.988606  | -0.139346 |
| C  | -5.230639 | 1.117316  | 1.537199  | C                              | 5.566237  | -1.532957 | 1.189059  | C                          | 0.105019  | 2.559417  | -0.810814 |
| C  | -3.935292 | 0.751381  | 1.257469  | C                              | 4.402804  | -0.810509 | 1.182799  | O                          | 0.168793  | -0.577259 | -0.640534 |
| N  | -3.458342 | 0.639186  | -0.006924 | N                              | 4.028343  | -0.090991 | 0.097904  | H                          | 3.018989  | -1.299201 | -0.715786 |
| H  | -3.869952 | 0.876712  | -2.031359 | H                              | 4.431220  | 0.535259  | -1.839162 | Cu                         | -1.584247 | 0.100738  | -0.267883 |
| H  | -6.202280 | 1.539479  | -1.718490 | H                              | 6.555465  | -0.709857 | -1.992182 | C                          | 4.783610  | -1.646554 | 0.305953  |
| H  | -5.541610 | 1.168134  | 2.571892  | H                              | 5.819261  | -2.091482 | 2.079418  | C                          | 5.978761  | -1.142544 | 0.745355  |
| H  | -3.238828 | 0.523001  | 2.057707  | H                              | 3.732715  | -0.777562 | 2.033544  | C                          | 6.333665  | 0.213369  | 0.462483  |
| N  | -7.417098 | 1.762808  | 0.699809  | N                              | 7.567887  | -2.230878 | 0.010481  | C                          | 5.382376  | 0.979266  | -0.281671 |
| C  | -7.917336 | 1.897933  | 2.069149  | C                              | 7.994375  | -3.007689 | 1.176761  | C                          | 4.205865  | 0.406888  | -0.689217 |
| H  | -7.391120 | 2.692862  | 2.609947  | H                              | 7.275929  | -3.801735 | 1.407918  | N                          | 3.914731  | -0.883812 | -0.399455 |
| H  | -8.976962 | 2.145857  | 2.034370  | H                              | 8.957556  | -3.466977 | 0.960931  | H                          | 4.477818  | -2.668030 | 0.497562  |



|                                  |           |           |           |                          |           |           |           |    |           |           |           |
|----------------------------------|-----------|-----------|-----------|--------------------------|-----------|-----------|-----------|----|-----------|-----------|-----------|
| H                                | 6.637010  | -1.793182 | 1.303762  | C                        | 4.174038  | -4.593838 | -2.103561 | Cl | 2.913412  | 4.051566  | 0.507130  |
| H                                | 5.567302  | 2.012967  | -0.538403 | C                        | 3.477793  | -5.319876 | -1.133212 | C  | -3.178006 | -4.155007 | -0.887479 |
| H                                | 3.458299  | 0.951361  | -1.253734 | H                        | 1.927620  | -5.247139 | 0.372088  | C  | -2.381632 | -3.497538 | 0.058250  |
| N                                | 7.501837  | 0.738842  | 0.876078  | H                        | 2.629126  | -1.571190 | -1.784543 | C  | -2.895097 | -3.131657 | 1.311153  |
| C                                | 7.842368  | 2.129442  | 0.566878  | H                        | 4.421404  | -2.690287 | -3.096028 | C  | -4.221490 | -3.433988 | 1.611298  |
| H                                | 7.108147  | 2.820545  | 0.994644  | H                        | 4.963248  | -5.075598 | -2.673090 | C  | -5.026578 | -4.093096 | 0.676291  |
| H                                | 8.817136  | 2.355968  | 0.995262  | H                        | 3.723999  | -6.360431 | -0.947511 | C  | -4.503002 | -4.450594 | -0.569441 |
| H                                | 7.892175  | 2.294095  | -0.515064 | O                        | -0.120841 | -2.470501 | -0.500699 | H  | -2.755030 | -4.427887 | -1.848547 |
| C                                | 8.453312  | -0.076761 | 1.634652  | C                        | 0.976983  | -2.705274 | 0.048077  | H  | -2.256893 | -2.624647 | 2.027691  |
| H                                | 8.787085  | -0.941432 | 1.050603  | O                        | -0.422995 | 0.261962  | 0.359428  | H  | -4.625256 | -3.155848 | 2.580082  |
| H                                | 9.322664  | 0.531547  | 1.877808  | H                        | 1.057332  | 2.671878  | 0.751912  | H  | -6.057832 | -4.329931 | 0.920124  |
| H                                | 8.008380  | -0.434396 | 2.569420  | Cu                       | -1.627524 | -1.243769 | 0.113579  | H  | -5.125169 | -4.963219 | -1.296634 |
| C                                | -4.441442 | 0.149570  | -0.480837 | C                        | 2.711201  | 3.923976  | 0.671327  | O  | 1.187035  | -2.488835 | 0.062687  |
| C                                | -5.745154 | 0.532401  | -0.264296 | C                        | 4.067462  | 4.018910  | 0.504766  | C  | 0.038506  | -2.819744 | -0.058409 |
| C                                | -6.031539 | 1.606980  | 0.627864  | C                        | 4.848877  | 2.840977  | 0.287275  | O  | 0.300281  | 0.083770  | -0.872145 |
| C                                | -4.904085 | 2.231863  | 1.236865  | C                        | 4.140652  | 1.598755  | 0.275625  | H  | -2.733058 | 1.028707  | -0.932854 |
| C                                | -3.633480 | 1.783417  | 0.959924  | C                        | 2.782733  | 1.579300  | 0.452989  | Cu | 2.059210  | -0.546160 | -0.519389 |
| N                                | -3.386290 | 0.749136  | 0.121969  | N                        | 2.083712  | 2.723874  | 0.643218  | C  | -4.285136 | 1.505274  | 0.343633  |
| H                                | -4.210126 | -0.668190 | -1.156581 | H                        | 2.082256  | 4.791493  | 0.830538  | C  | -5.581277 | 1.270849  | 0.718755  |
| H                                | -6.533027 | 0.003571  | -0.783512 | H                        | 4.521894  | 4.999243  | 0.535812  | C  | -6.358775 | 0.284393  | 0.035234  |
| H                                | -5.020648 | 3.060606  | 1.922076  | H                        | 4.653459  | 0.658824  | 0.128243  | C  | -5.707070 | -0.418372 | -1.025920 |
| H                                | -2.768480 | 2.256304  | 1.410871  | H                        | 2.203312  | 0.664128  | 0.451882  | C  | -4.406956 | -0.129321 | -1.346480 |
| N                                | -7.295449 | 2.013638  | 0.878261  | N                        | 6.180720  | 2.898669  | 0.101791  | N  | -3.710893 | 0.816130  | -0.671391 |
| C                                | -7.541719 | 3.154092  | 1.760597  | C                        | 6.948560  | 1.675977  | -0.145178 | H  | -3.662332 | 2.245273  | 0.831852  |
| H                                | -7.098377 | 4.073172  | 1.359574  | H                        | 6.596071  | 1.165637  | -1.048071 | H  | -5.993335 | 1.847390  | 1.535143  |
| H                                | -8.616358 | 3.302613  | 1.853756  | H                        | 7.995347  | 1.939769  | -0.285175 | H  | -6.217338 | -1.184736 | -1.592088 |
| H                                | -7.130582 | 2.976487  | 2.760263  | H                        | 6.876159  | 0.983817  | 0.700775  | H  | -3.878192 | -0.636594 | -2.144211 |
| C                                | -8.427039 | 1.368530  | 0.212327  | C                        | 6.877901  | 4.186715  | 0.127167  | N  | -7.637021 | 0.032657  | 0.372836  |
| H                                | -8.447412 | 0.293566  | 0.421036  | H                        | 6.758243  | 4.680728  | 1.097428  | C  | -8.408162 | -0.984717 | -0.345546 |
| H                                | -9.351729 | 1.806259  | 0.585626  | H                        | 7.939185  | 4.016112  | -0.044672 | H  | -7.968340 | -1.979721 | -0.214542 |
| H                                | -8.389067 | 1.513287  | -0.873944 | H                        | 6.503223  | 4.854957  | -0.655877 | H  | -9.423047 | -0.999532 | 0.047892  |
| <b>M<sub>1RA</sub>-TS6 (OAc)</b> |           |           |           | C                        | -4.130492 | -4.342376 | 0.904315  | H  | -8.455977 | -0.759087 | -1.415973 |
| C                                | -1.108812 | 1.318348  | 0.587740  | H                        | -4.143389 | -4.908822 | 1.836610  | C  | -8.270777 | 0.763279  | 1.472735  |
| O                                | -0.717718 | 2.453831  | 0.834540  | H                        | -3.936506 | -5.021077 | 0.067064  | H  | -8.303275 | 1.838419  | 1.265576  |
| N                                | 1.543540  | -2.519140 | 1.206962  | H                        | -5.109921 | -3.884630 | 0.734670  | H  | -9.291487 | 0.403960  | 1.591077  |
| N                                | 0.404323  | -1.857810 | 2.331781  | C                        | -3.061776 | -3.277855 | 0.948932  | H  | -7.736225 | 0.602209  | 2.415104  |
| N                                | 0.239002  | -1.531043 | 3.377860  | O                        | -2.260409 | -3.166530 | 1.886498  | C  | 4.700861  | -1.371623 | -1.221371 |
| O                                | -2.468010 | 1.011487  | 0.533504  | O                        | -3.032893 | -2.474221 | -0.086620 | C  | 6.003194  | -1.778987 | -1.059190 |
| C                                | -3.426449 | 2.054084  | 0.680587  | <b>M<sub>1RA</sub>-9</b> |           |           |           | C  | 6.561486  | -1.867195 | 0.250952  |
| C                                | -4.156510 | 2.310256  | -0.647455 | C                        | -0.029496 | 1.308413  | -1.069291 | C  | 5.689035  | -1.538145 | 1.331664  |
| H                                | -2.928045 | 2.971173  | 0.998121  | O                        | -1.167201 | 1.734386  | -1.266444 | C  | 4.398682  | -1.139956 | 1.074590  |
| H                                | -4.158070 | 1.741531  | 1.428118  | N                        | -1.056804 | -3.214953 | -0.265788 | N  | 3.901607  | -1.024081 | -0.181830 |
| Cl                               | -5.337588 | 3.640767  | -0.364571 | O                        | 1.053737  | 2.158431  | -1.065957 | H  | 4.262372  | -1.297874 | -2.211377 |
| Cl                               | -2.994061 | 2.798666  | -1.933466 | C                        | 0.817138  | 3.551089  | -1.210067 | H  | 6.582624  | -2.022675 | -1.939225 |
| Cl                               | -5.039406 | 0.836590  | -1.188287 | C                        | 1.176687  | 4.293347  | 0.087038  | H  | 6.021466  | -1.585375 | 2.359790  |
| C                                | 2.471617  | -4.702662 | -0.392674 | H                        | -0.230769 | 3.739078  | -1.447724 | H  | 3.724997  | -0.884188 | 1.885817  |
| C                                | 2.156216  | -3.359672 | -0.656149 | H                        | 1.457992  | 3.926214  | -2.011467 | N  | 7.839722  | -2.248757 | 0.456512  |
| C                                | 2.870909  | -2.615340 | -1.612406 | Cl                       | 0.872187  | 6.048324  | -0.184345 | C  | 8.363992  | -2.387321 | 1.816808  |
| C                                | 3.871433  | -3.245956 | -2.343006 | Cl                       | 0.160650  | 3.714771  | 1.458800  | H  | 7.812978  | -3.149698 | 2.378643  |

|                                            |           |           |           |                            |            |           |           |                                              |           |           |           |
|--------------------------------------------|-----------|-----------|-----------|----------------------------|------------|-----------|-----------|----------------------------------------------|-----------|-----------|-----------|
| H                                          | 9.409563  | -2.685802 | 1.762404  | C                          | 5.998668   | -4.372594 | -1.673601 | H                                            | 3.173042  | 0.688701  | 2.095570  |
| H                                          | 8.302018  | -1.437722 | 2.358764  | H                          | 5.757897   | -4.281769 | -2.738606 | N                                            | 7.302131  | 1.990523  | 0.642810  |
| C                                          | 8.702148  | -2.595257 | -0.674891 | H                          | 7.077937   | -4.471302 | -1.570675 | C                                            | 7.843787  | 2.086070  | 1.998515  |
| H                                          | 8.751279  | -1.770977 | -1.393495 | H                          | 5.529799   | -5.282601 | -1.284289 | H                                            | 7.811322  | 1.117453  | 2.510087  |
| H                                          | 9.707330  | -2.788232 | -0.304448 | C                          | -2.015597  | 5.314427  | -2.634757 | H                                            | 8.882234  | 2.409376  | 1.941723  |
| H                                          | 8.340851  | -3.491854 | -1.191446 | H                          | -1.988591  | 5.091176  | -3.703074 | H                                            | 7.288228  | 2.815974  | 2.598454  |
| <b>M<sub>1RA</sub>-9 (OAc<sup>-</sup>)</b> |           |           |           | H                          | -1.108360  | 5.872569  | -2.374488 | C                                            | 8.159136  | 2.322342  | -0.495500 |
| C                                          | -1.738036 | -0.719599 | -0.529860 | H                          | -2.882371  | 5.932934  | -2.393088 | H                                            | 7.790790  | 3.206143  | -1.029656 |
| O                                          | -1.186058 | -1.821843 | -0.577074 | C                          | -2.039441  | 4.053655  | -1.837902 | H                                            | 9.163184  | 2.533593  | -0.130966 |
| N                                          | 2.027213  | 2.191897  | 1.573807  | O                          | -1.497234  | 2.977873  | -2.259058 | H                                            | 8.219099  | 1.487129  | -1.201740 |
| O                                          | -3.109978 | -0.614697 | -0.579530 | O                          | -2.576814  | 4.004331  | -0.675658 | C                                            | -2.382815 | 4.190915  | -0.508646 |
| C                                          | -3.874725 | -1.809208 | -0.623005 | <b>M<sub>1RA</sub>-TS7</b> |            |           |           | C                                            | -3.383312 | 4.397011  | -1.465431 |
| C                                          | -4.666658 | -1.989095 | 0.682173  | C                          | -0.728288  | -1.186025 | 0.270821  | C                                            | -2.501396 | 4.700801  | 0.791576  |
| H                                          | -3.226418 | -2.674755 | -0.766047 | O                          | -1.148890  | -2.209309 | 0.660024  | C                                            | -4.517443 | 5.126081  | -1.109872 |
| H                                          | -4.586829 | -1.730572 | -1.448016 | O                          | 1.280670   | -1.463619 | -0.057498 | H                                            | -3.263879 | 3.991854  | -2.464719 |
| Cl                                         | -5.621149 | -3.511737 | 0.537378  | C                          | -0.203043  | 2.932644  | -0.794154 | C                                            | -3.642288 | 5.426394  | 1.128656  |
| Cl                                         | -3.557100 | -2.111458 | 2.096230  | O                          | 0.875906   | 2.394062  | -0.814783 | H                                            | -1.709414 | 4.527422  | 1.512848  |
| Cl                                         | -5.793946 | -0.605986 | 0.944859  | O                          | -0.708517  | -0.037890 | -0.074792 | C                                            | -4.649715 | 5.640448  | 0.182759  |
| C                                          | 4.053977  | 3.177954  | 0.640733  | C                          | -5.304464  | -3.288487 | 0.485503  | H                                            | -5.297988 | 5.291525  | -1.846023 |
| C                                          | 3.423516  | 2.285624  | 1.519757  | C                          | -6.622102  | -2.963535 | 0.314301  | H                                            | -3.742313 | 5.825418  | 2.133448  |
| C                                          | 4.176354  | 1.464059  | 2.367166  | C                          | -7.034432  | -1.593078 | 0.327020  | H                                            | -5.535178 | 6.207845  | 0.452812  |
| C                                          | 5.569653  | 1.539001  | 2.332349  | C                          | -6.006220  | -0.617333 | 0.526313  | C                                            | 2.046467  | -2.365644 | 0.662441  |
| C                                          | 6.207705  | 2.424454  | 1.459765  | C                          | -4.706568  | -1.010178 | 0.692632  | H                                            | 2.832407  | -1.879500 | 1.254277  |
| C                                          | 5.446226  | 3.241144  | 0.617709  | N                          | -4.368759  | -2.323796 | 0.670940  | H                                            | 1.412958  | -2.946331 | 1.347817  |
| H                                          | 3.453515  | 3.807653  | -0.008953 | H                          | -4.946887  | -4.310393 | 0.481213  | C                                            | 2.746576  | -3.390242 | -0.261691 |
| H                                          | 3.667517  | 0.784676  | 3.043220  | H                          | -7.333046  | -3.764376 | 0.168010  | Cl                                           | 3.923397  | -2.576081 | -1.357886 |
| H                                          | 6.154854  | 0.905218  | 2.992025  | H                          | -6.229125  | 0.440005  | 0.551295  | Cl                                           | 3.631406  | -4.575304 | 0.777183  |
| H                                          | 7.291851  | 2.480189  | 1.436641  | H                          | -3.896474  | -0.307663 | 0.845820  | Cl                                           | 1.536195  | -4.274292 | -1.264435 |
| H                                          | 5.936396  | 3.932333  | -0.061642 | N                          | -8.320404  | -1.241519 | 0.158360  | <b>M<sub>1RA</sub>-TS7 (OAc<sup>-</sup>)</b> |           |           |           |
| O                                          | -0.078546 | 3.037907  | 0.848613  | C                          | -8.711727  | 0.170932  | 0.160126  | C                                            | 0.241243  | -0.635191 | 0.450082  |
| C                                          | 1.000411  | 2.652692  | 1.164890  | H                          | -8.207028  | 0.719563  | -0.642048 | O                                            | -0.069742 | -1.644273 | 0.963547  |
| O                                          | -1.157533 | 0.416734  | -0.445326 | H                          | -9.786176  | 0.237936  | -0.000106 | O                                            | 2.259864  | -0.827029 | -0.024672 |
| H                                          | 0.527686  | -1.998774 | -0.649793 | H                          | -8.472780  | 0.645658  | 1.117738  | C                                            | 0.695733  | 3.565734  | -0.496662 |
| Cu                                         | -2.013514 | 2.122129  | -0.460083 | C                          | -9.350625  | -2.266247 | -0.034362 | O                                            | 1.733466  | 3.000743  | -0.737006 |
| C                                          | 1.932396  | -3.309204 | -1.427997 | H                          | -9.398286  | -2.942834 | 0.825429  | O                                            | 0.161716  | 0.470978  | 0.004286  |
| C                                          | 3.254095  | -3.656167 | -1.524532 | H                          | -10.317260 | -1.777715 | -0.142827 | C                                            | -3.737873 | -3.731720 | 0.469811  |
| C                                          | 4.251302  | -2.874901 | -0.861753 | H                          | -9.155927  | -2.855548 | -0.936707 | C                                            | -5.083269 | -3.758931 | 0.223484  |
| C                                          | 3.787036  | -1.740814 | -0.125249 | H                          | -3.396868  | -2.590665 | 0.793803  | C                                            | -5.842421 | -2.545716 | 0.228603  |
| C                                          | 2.447791  | -1.455842 | -0.073168 | N                          | -1.250694  | 3.463694  | -0.867903 | C                                            | -5.119800 | -1.340820 | 0.501797  |
| N                                          | 1.538668  | -2.229036 | -0.712480 | Cu                         | 1.432818   | 0.429199  | -0.253526 | C                                            | -3.773270 | -1.383446 | 0.738393  |
| H                                          | 1.145946  | -3.875186 | -1.912766 | C                          | 4.121620   | 1.202530  | -1.012557 | N                                            | -3.100101 | -2.561194 | 0.721704  |
| H                                          | 3.516083  | -4.526732 | -2.109153 | C                          | 5.439478   | 1.568274  | -0.857830 | H                                            | -3.124822 | -4.624201 | 0.476882  |
| H                                          | 4.471428  | -1.092263 | 0.403479  | C                          | 6.013332   | 1.633944  | 0.445333  | H                                            | -5.550045 | -4.714207 | 0.029325  |
| H                                          | 2.053785  | -0.608536 | 0.475203  | C                          | 5.147727   | 1.299173  | 1.527359  | H                                            | -5.613224 | -0.379564 | 0.525054  |
| N                                          | 5.558411  | -3.191724 | -0.927431 | C                          | 3.840879   | 0.944065  | 1.279205  | H                                            | -3.187157 | -0.496665 | 0.946496  |
| C                                          | 6.557642  | -2.365795 | -0.245750 | N                          | 3.316811   | 0.898647  | 0.032198  | N                                            | -7.165012 | -2.538419 | -0.009688 |
| H                                          | 6.392824  | -2.358743 | 0.837361  | H                          | 3.675407   | 1.150424  | -2.000188 | C                                            | -7.917569 | -1.280812 | 0.017659  |
| H                                          | 7.546557  | -2.776470 | -0.441819 | H                          | 6.015598   | 1.804904  | -1.742193 | H                                            | -7.539385 | -0.578582 | -0.732760 |
| H                                          | 6.533098  | -1.333872 | -0.611862 | H                          | 5.491333   | 1.319912  | 2.552851  | H                                            | -8.962409 | -1.490815 | -0.202865 |

|                           |           |           |           |                                 |           |           |           |    |           |           |           |
|---------------------------|-----------|-----------|-----------|---------------------------------|-----------|-----------|-----------|----|-----------|-----------|-----------|
| H                         | -7.858126 | -0.808663 | 1.004105  | H                               | 4.705128  | -1.362403 | -3.138361 | O  | -0.705053 | -1.199763 | 0.026232  |
| C                         | -7.876031 | -3.788460 | -0.293013 | H                               | 6.627356  | -1.612830 | 0.705036  | C  | -1.359560 | -2.377336 | 0.345310  |
| H                         | -7.803496 | -4.484234 | 0.549710  | H                               | 8.266825  | -3.245645 | -0.220288 | C  | -1.117455 | -3.490930 | -0.703624 |
| H                         | -8.927108 | -3.563739 | -0.465118 | H                               | 8.122492  | -3.935277 | -2.604276 | H  | -2.448564 | -2.225860 | 0.379305  |
| H                         | -7.474243 | -4.275368 | -1.187912 | H                               | 6.342937  | -2.995243 | -4.064475 | H  | -1.049182 | -2.786664 | 1.316794  |
| H                         | -2.100616 | -2.566439 | 0.902179  | O                               | 2.884555  | 1.044006  | -0.292963 | Cl | -2.043879 | -4.961462 | -0.209208 |
| N                         | -0.266647 | 4.176078  | -0.199150 | C                               | 3.768858  | 0.243589  | -0.499442 | Cl | -1.681150 | -2.964300 | -2.336316 |
| Cu                        | 2.347992  | 1.061772  | -0.236514 | H                               | -1.622804 | -1.221875 | 0.276632  | Cl | 0.635979  | -3.908447 | -0.810748 |
| C                         | -1.558758 | 4.691548  | -0.277954 | Cu                              | 0.921028  | 0.588813  | 0.330138  | C  | 5.471172  | 2.751878  | -0.321086 |
| C                         | -2.361509 | 4.399145  | -1.388947 | C                               | -2.776414 | -2.952219 | 0.218502  | C  | 5.604828  | 1.367254  | -0.493004 |
| C                         | -2.025991 | 5.499022  | 0.765073  | C                               | -3.715044 | -3.682968 | -0.460099 | C  | 6.623725  | 0.828223  | -1.286271 |
| C                         | -3.649826 | 4.927371  | -1.446019 | C                               | -4.241185 | -3.203447 | -1.700464 | C  | 7.519219  | 1.692231  | -1.915703 |
| H                         | -1.973363 | 3.772062  | -2.185067 | C                               | -3.720761 | -1.958305 | -2.173417 | C  | 7.398190  | 3.074871  | -1.753676 |
| C                         | -3.317894 | 6.018506  | 0.690601  | C                               | -2.780823 | -1.283138 | -1.441286 | C  | 6.375540  | 3.599877  | -0.957337 |
| H                         | -1.381616 | 5.709278  | 1.612130  | N                               | -2.320048 | -1.770510 | -0.263368 | H  | 4.672630  | 3.143301  | 0.300933  |
| C                         | -4.130196 | 5.735315  | -0.410663 | H                               | -2.360396 | -3.277818 | 1.163904  | H  | 6.703671  | -0.247724 | -1.400474 |
| H                         | -4.278292 | 4.706424  | -2.303439 | H                               | -4.047265 | -4.617854 | -0.030731 | H  | 8.312349  | 1.281953  | -2.533222 |
| H                         | -3.688022 | 6.646051  | 1.495512  | H                               | -4.051428 | -1.527367 | -3.108109 | H  | 8.098842  | 3.742553  | -2.245866 |
| H                         | -5.135140 | 6.143088  | -0.462914 | H                               | -2.363373 | -0.337113 | -1.764191 | H  | 6.279569  | 4.673788  | -0.829144 |
| C                         | 3.152610  | -1.652275 | 0.631768  | N                               | -5.176514 | -3.886584 | -2.384612 | O  | 2.887800  | -0.251825 | 1.469582  |
| H                         | 4.029196  | -1.108285 | 1.006239  | C                               | -5.712389 | -3.358329 | -3.641379 | C  | 3.786959  | 0.172980  | 0.787776  |
| H                         | 2.673949  | -2.163473 | 1.479886  | H                               | -4.937006 | -3.309439 | -4.414289 | H  | -1.805305 | 0.087853  | -0.204214 |
| C                         | 3.692027  | -2.767537 | -0.296768 | H                               | -6.507003 | -4.016543 | -3.988619 | Cu | 0.919994  | -0.751822 | 0.877612  |
| Cl                        | 4.603717  | -2.075449 | -1.688143 | H                               | -6.132299 | -2.357327 | -3.499040 | C  | -3.345706 | 0.797104  | -1.411775 |
| Cl                        | 4.801685  | -3.821268 | 0.669817  | C                               | -5.662967 | -5.176516 | -1.889558 | C  | -4.338239 | 1.725564  | -1.585854 |
| Cl                        | 2.338171  | -3.775514 | -0.937590 | H                               | -6.156108 | -5.066041 | -0.917583 | C  | -4.547044 | 2.744710  | -0.605297 |
| O                         | 4.199521  | 1.450102  | -0.118049 | H                               | -6.384804 | -5.576158 | -2.599678 | C  | -3.665069 | 2.735422  | 0.518821  |
| C                         | 3.797360  | 2.436716  | 2.065294  | H                               | -4.842473 | -5.894926 | -1.789551 | C  | -2.691115 | 1.777010  | 0.626039  |
| H                         | 3.286895  | 3.372220  | 1.807354  | C                               | -1.195712 | 2.379574  | -0.612657 | N  | -2.538825 | 0.821810  | -0.323705 |
| H                         | 4.369837  | 2.601279  | 2.980366  | C                               | -1.785366 | 3.520444  | -1.107820 | H  | -3.161492 | 0.006087  | -2.128187 |
| H                         | 3.028786  | 1.675900  | 2.246778  | C                               | -0.990271 | 4.664686  | -1.406218 | H  | -4.953271 | 1.660620  | -2.472664 |
| C                         | 4.729888  | 2.050245  | 0.928148  | C                               | 0.404636  | 4.534945  | -1.147988 | H  | -3.744482 | 3.476374  | 1.302416  |
| O                         | 5.929108  | 2.311610  | 0.961066  | C                               | 0.908749  | 3.354483  | -0.651391 | H  | -1.991098 | 1.736526  | 1.453943  |
| <b>M<sub>1RA-10</sub></b> |           |           |           | N                               | 0.136355  | 2.273542  | -0.385378 | N  | -5.522726 | 3.664162  | -0.734118 |
| N                         | 4.669610  | -0.495477 | -0.641972 | H                               | -1.796433 | 1.507554  | -0.382107 | C  | -5.714322 | 4.689783  | 0.293637  |
| O                         | -0.545967 | -0.202233 | 1.200833  | H                               | -2.855643 | 3.518737  | -1.265773 | H  | -4.822905 | 5.317978  | 0.397573  |
| C                         | -1.158616 | 0.369065  | 2.306844  | H                               | 1.091236  | 5.351072  | -1.328845 | H  | -6.551290 | 5.324499  | 0.007119  |
| C                         | -0.610323 | -0.173446 | 3.650523  | H                               | 1.969900  | 3.256286  | -0.455072 | H  | -5.939950 | 4.237164  | 1.265425  |
| H                         | -2.235132 | 0.148196  | 2.305929  | N                               | -1.524935 | 5.802812  | -1.900774 | C  | -6.408302 | 3.647748  | -1.900047 |
| H                         | -1.039953 | 1.460779  | 2.339207  | C                               | -0.668543 | 6.950180  | -2.201432 | H  | -6.959163 | 2.703218  | -1.965621 |
| Cl                        | -1.552474 | 0.583455  | 4.991619  | H                               | 0.126664  | 6.674291  | -2.902122 | H  | -7.128424 | 4.458820  | -1.806825 |
| Cl                        | -0.794697 | -1.965320 | 3.737952  | H                               | -1.272503 | 7.730223  | -2.662686 | H  | -5.844184 | 3.790595  | -2.828112 |
| Cl                        | 1.135834  | 0.236756  | 3.855746  | H                               | -0.208047 | 7.357925  | -1.293547 | C  | -0.599284 | 0.289919  | 4.491116  |
| C                         | 5.487141  | -1.782579 | -2.514406 | C                               | -2.970724 | 5.918201  | -2.091345 | H  | 0.113485  | -0.126434 | 5.208445  |
| C                         | 5.582011  | -1.405250 | -1.168007 | H                               | -3.508879 | 5.778590  | -1.146751 | H  | -0.810469 | 1.331553  | 4.736839  |
| C                         | 6.578214  | -1.924225 | -0.332946 | H                               | -3.198717 | 6.913250  | -2.470771 | H  | -1.522111 | -0.295261 | 4.567499  |
| C                         | 7.490803  | -2.836961 | -0.860063 | H                               | -3.337782 | 5.180890  | -2.814245 | C  | -0.054650 | 0.178700  | 3.083454  |
| C                         | 7.408558  | -3.223822 | -2.200474 | <b>M<sub>1RA-10</sub> (OAc)</b> |           |           |           | O  | -0.037641 | 1.145444  | 2.297047  |
| C                         | 6.408242  | -2.696184 | -3.022844 | N                               | 4.712519  | 0.498085  | 0.133347  | O  | 0.379301  | -0.996979 | 2.742184  |

|                            |           |           |           |                                              |           |           |           |                           |           |           |           |
|----------------------------|-----------|-----------|-----------|----------------------------------------------|-----------|-----------|-----------|---------------------------|-----------|-----------|-----------|
| <b>M<sub>1RA</sub>-TS8</b> |           |           |           | H                                            | 0.478401  | -1.349770 | -2.591409 | H                         | -3.435000 | 2.594504  | 1.813784  |
| O                          | -0.881851 | -0.467729 | -0.138960 | C                                            | 2.482234  | -4.468234 | -1.429492 | N                         | -7.097919 | 2.434118  | -0.908856 |
| C                          | 0.968509  | -0.159440 | 0.070381  | H                                            | 2.990575  | -3.288952 | 0.311972  | C                         | -7.971340 | 3.059605  | 0.084511  |
| O                          | 0.856266  | 0.982113  | 0.502186  | C                                            | 1.789425  | -4.499766 | -2.642958 | H                         | -7.612770 | 4.059227  | 0.354816  |
| C                          | 4.868094  | 0.981915  | -1.003704 | H                                            | 0.529326  | -3.393329 | -4.002222 | H                         | -8.971793 | 3.155860  | -0.334607 |
| C                          | 6.001711  | 1.747631  | -1.039150 | H                                            | 3.050099  | -5.334454 | -1.102930 | H                         | -8.035140 | 2.453679  | 0.995502  |
| C                          | 6.865285  | 1.807908  | 0.100055  | H                                            | 1.816130  | -5.390564 | -3.263242 | C                         | -7.652247 | 2.043221  | -2.205529 |
| C                          | 6.477036  | 1.032253  | 1.238070  | C                                            | -1.666484 | -1.616829 | -0.139574 | H                         | -7.545591 | 0.965979  | -2.375240 |
| C                          | 5.329452  | 0.287190  | 1.205381  | C                                            | -1.951779 | -2.224223 | 1.258044  | H                         | -8.712558 | 2.289734  | -2.224339 |
| N                          | 4.542269  | 0.267250  | 0.101538  | Cl                                           | -2.859666 | -3.766431 | 1.002301  | H                         | -7.158524 | 2.576644  | -3.025802 |
| H                          | 4.184556  | 0.908096  | -1.840606 | Cl                                           | -2.963713 | -1.122158 | 2.268014  | C                         | 1.715798  | -2.208110 | -1.044658 |
| H                          | 6.221132  | 2.298867  | -1.942793 | Cl                                           | -0.426445 | -2.575771 | 2.147539  | C                         | 1.028649  | -2.228161 | -2.269374 |
| H                          | 7.073440  | 1.017184  | 2.139488  | H                                            | -2.641972 | -1.418355 | -0.600326 | C                         | 2.453489  | -3.325661 | -0.630490 |
| H                          | 4.996932  | -0.312492 | 2.043641  | H                                            | -1.167623 | -2.399372 | -0.722752 | C                         | 1.065245  | -3.377950 | -3.057666 |
| N                          | 7.983341  | 2.554883  | 0.100681  | <b>M<sub>1RA</sub>-TS8 (OAc<sup>-</sup>)</b> |           |           |           | H                         | 0.478401  | -1.349770 | -2.591409 |
| C                          | 8.849385  | 2.595013  | 1.282247  | O                                            | -0.881851 | -0.467729 | -0.138960 | C                         | 2.482234  | -4.468234 | -1.429492 |
| H                          | 9.250977  | 1.602092  | 1.511871  | C                                            | 0.968509  | -0.159440 | 0.070381  | H                         | 2.990575  | -3.288952 | 0.311972  |
| H                          | 9.682298  | 3.267292  | 1.084925  | O                                            | 0.856266  | 0.982113  | 0.502186  | C                         | 1.789425  | -4.499766 | -2.642958 |
| H                          | 8.304272  | 2.965485  | 2.156947  | C                                            | 4.868094  | 0.981915  | -1.003704 | H                         | 0.529326  | -3.393329 | -4.002222 |
| C                          | 8.361119  | 3.326167  | -1.086613 | C                                            | 6.001711  | 1.747631  | -1.039150 | H                         | 3.050099  | -5.334454 | -1.102930 |
| H                          | 7.582163  | 4.049148  | -1.350366 | C                                            | 6.865285  | 1.807908  | 0.100055  | H                         | 1.816130  | -5.390564 | -3.263242 |
| H                          | 9.279558  | 3.871240  | -0.875360 | C                                            | 6.477036  | 1.032253  | 1.238070  | C                         | -1.666484 | -1.616829 | -0.139574 |
| H                          | 8.537219  | 2.668373  | -1.944558 | C                                            | 5.329452  | 0.287190  | 1.205381  | C                         | -1.951779 | -2.224223 | 1.258044  |
| H                          | 3.682038  | -0.285783 | 0.099566  | N                                            | 4.542269  | 0.267250  | 0.101538  | Cl                        | -2.859666 | -3.766431 | 1.002301  |
| N                          | 1.746610  | -1.055825 | -0.245515 | H                                            | 4.184556  | 0.908096  | -1.840606 | Cl                        | -2.963713 | -1.122158 | 2.268014  |
| Cu                         | -1.185427 | 1.406741  | 0.361900  | H                                            | 6.221132  | 2.298867  | -1.942793 | Cl                        | -0.426445 | -2.575771 | 2.147539  |
| C                          | -3.593541 | 1.401229  | -1.248659 | H                                            | 7.073440  | 1.017184  | 2.139488  | H                         | -2.641972 | -1.418355 | -0.600326 |
| C                          | -4.914322 | 1.607495  | -1.573300 | H                                            | 4.996932  | -0.312492 | 2.043641  | H                         | -1.167623 | -2.399372 | -0.722752 |
| C                          | -5.794121 | 2.216304  | -0.630853 | N                                            | 7.983341  | 2.554883  | 0.100681  | <b>M<sub>1RA</sub>-11</b> |           |           |           |
| C                          | -5.216608 | 2.575675  | 0.622663  | C                                            | 8.849385  | 2.595013  | 1.282247  | N                         | 2.396230  | 1.169334  | 0.577374  |
| C                          | -3.884088 | 2.329621  | 0.862083  | H                                            | 9.250977  | 1.602092  | 1.511871  | O                         | 0.621470  | 2.321499  | -0.286064 |
| N                          | -3.065319 | 1.758650  | -0.053746 | H                                            | 9.682298  | 3.267292  | 1.084925  | C                         | -0.668090 | 2.320537  | -0.915759 |
| H                          | -2.915753 | 0.938469  | -1.958403 | H                                            | 8.304272  | 2.965485  | 2.156947  | C                         | -0.921937 | 3.731840  | -1.454172 |
| H                          | -5.258630 | 1.301837  | -2.552022 | C                                            | 8.361119  | 3.326167  | -1.086613 | H                         | -1.451277 | 2.065262  | -0.196013 |
| H                          | -5.802972 | 3.042267  | 1.402832  | H                                            | 7.582163  | 4.049148  | -1.350366 | H                         | -0.680980 | 1.611349  | -1.746851 |
| H                          | -3.435000 | 2.594504  | 1.813784  | H                                            | 9.279558  | 3.871240  | -0.875360 | Cl                        | -2.521777 | 3.696704  | -2.281541 |
| N                          | -7.097919 | 2.434118  | -0.908856 | H                                            | 8.537219  | 2.668373  | -1.944558 | Cl                        | -0.969138 | 4.929533  | -0.111895 |
| C                          | -7.971340 | 3.059605  | 0.084511  | H                                            | 3.682038  | -0.285783 | 0.099566  | Cl                        | 0.350030  | 4.209892  | -2.631676 |
| H                          | -7.612770 | 4.059227  | 0.354816  | N                                            | 1.746610  | -1.055825 | -0.245515 | C                         | 4.435560  | 2.052529  | 1.379512  |
| H                          | -8.971793 | 3.155860  | -0.334607 | Cu                                           | -1.185427 | 1.406741  | 0.361900  | C                         | 3.004737  | 2.133532  | 1.286621  |
| H                          | -8.035140 | 2.453679  | 0.995502  | C                                            | -3.593541 | 1.401229  | -1.248659 | C                         | 2.326670  | 3.185634  | 1.992542  |
| C                          | -7.652247 | 2.043221  | -2.205529 | C                                            | -4.914322 | 1.607495  | -1.573300 | C                         | 3.055140  | 4.106074  | 2.715841  |
| H                          | -7.545591 | 0.965979  | -2.375240 | C                                            | -5.794121 | 2.216304  | -0.630853 | C                         | 4.460986  | 4.022367  | 2.772848  |
| H                          | -8.712558 | 2.289734  | -2.224339 | C                                            | -5.216608 | 2.575675  | 0.622663  | C                         | 5.143128  | 2.989683  | 2.101806  |
| H                          | -7.158524 | 2.576644  | -3.025802 | C                                            | -3.884088 | 2.329621  | 0.862083  | H                         | 4.935297  | 1.243012  | 0.857794  |
| C                          | 1.715798  | -2.208110 | -1.044658 | N                                            | -3.065319 | 1.758650  | -0.053746 | H                         | 1.245286  | 3.243374  | 1.960871  |
| C                          | 1.028649  | -2.228161 | -2.269374 | H                                            | -2.915753 | 0.938469  | -1.958403 | H                         | 2.542368  | 4.899206  | 3.250366  |
| C                          | 2.453489  | -3.325661 | -0.630490 | H                                            | -5.258630 | 1.301837  | -2.552022 | H                         | 5.020134  | 4.756075  | 3.344866  |
| C                          | 1.065245  | -3.377950 | -3.057666 | H                                            | -5.802972 | 3.042267  | 1.402832  | H                         | 6.225195  | 2.930596  | 2.157447  |

|                                 |           |           |           |                            |           |           |           |    |           |           |           |
|---------------------------------|-----------|-----------|-----------|----------------------------|-----------|-----------|-----------|----|-----------|-----------|-----------|
| O                               | 0.428986  | 0.111670  | 0.234252  | C                          | -4.866545 | -0.548313 | 1.538047  | C  | 1.646983  | 1.826965  | 0.977823  |
| C                               | 1.084447  | 1.164981  | 0.209882  | C                          | -3.552715 | -0.239577 | 1.296836  | C  | 2.903965  | 2.385964  | 0.977402  |
| H                               | 3.249023  | -0.513085 | 0.115830  | N                          | -3.078304 | -0.105103 | 0.036711  | C  | 3.424837  | 2.954397  | -0.222720 |
| Cu                              | -1.419636 | -0.468030 | 0.386917  | H                          | -3.445801 | -0.151495 | -2.002918 | C  | 2.578767  | 2.892738  | -1.370168 |
| C                               | 4.380744  | -1.723908 | -1.130660 | H                          | -5.834775 | -0.711466 | -1.748036 | C  | 1.334709  | 2.311120  | -1.271836 |
| C                               | 4.825287  | -2.990989 | -1.399126 | H                          | -5.192904 | -0.644355 | 2.564227  | N  | 0.861611  | 1.781562  | -0.122262 |
| C                               | 4.448209  | -4.080451 | -0.551909 | H                          | -2.837055 | -0.086542 | 2.096153  | H  | 1.226148  | 1.398298  | 1.882260  |
| C                               | 3.606454  | -3.761939 | 0.560138  | N                          | -7.073800 | -1.015820 | 0.643206  | H  | 3.472854  | 2.391207  | 1.897299  |
| C                               | 3.201611  | -2.470851 | 0.768619  | C                          | -7.609482 | -1.140144 | 2.000533  | H  | 2.889274  | 3.302035  | -2.321983 |
| N                               | 3.583939  | -1.472158 | -0.063678 | H                          | -7.477995 | -0.209345 | 2.563227  | H  | 0.670014  | 2.263503  | -2.129111 |
| H                               | 4.638328  | -0.872070 | -1.748358 | H                          | -8.674458 | -1.358653 | 1.940602  | N  | 4.649591  | 3.525059  | -0.267708 |
| H                               | 5.456451  | -3.141656 | -2.263802 | H                          | -7.119390 | -1.953035 | 2.547464  | C  | 5.150860  | 4.109894  | -1.511728 |
| H                               | 3.276830  | -4.521641 | 1.254920  | C                          | -7.972987 | -1.194880 | -0.498577 | H  | 4.492650  | 4.910807  | -1.866037 |
| H                               | 2.566204  | -2.185728 | 1.598240  | H                          | -7.652269 | -2.031913 | -1.128619 | H  | 6.137924  | 4.531896  | -1.330189 |
| N                               | 4.863330  | -5.337823 | -0.788622 | H                          | -8.974105 | -1.407711 | -0.127732 | H  | 5.236395  | 3.353740  | -2.300490 |
| C                               | 4.434776  | -6.439022 | 0.077431  | H                          | -8.017297 | -0.289094 | -1.113359 | C  | 5.493172  | 3.560448  | 0.927301  |
| H                               | 3.342698  | -6.514262 | 0.105919  | H                          | -2.072145 | 0.174251  | -0.123215 | H  | 5.718704  | 2.548822  | 1.282926  |
| H                               | 4.833276  | -7.371668 | -0.317885 | N                          | -0.518353 | 0.887157  | -0.458712 | H  | 6.430676  | 4.057073  | 0.682607  |
| H                               | 4.805697  | -6.307006 | 1.099882  | Cu                         | 2.152830  | -2.124735 | -0.461335 | H  | 5.008511  | 4.115958  | 1.737942  |
| C                               | 5.744772  | -5.627885 | -1.922240 | C                          | -0.586345 | 2.233589  | -0.876508 | N  | -1.589244 | 1.008992  | 0.027077  |
| H                               | 6.670933  | -5.047302 | -1.859010 | C                          | -0.021021 | 2.676965  | -2.087445 | H  | -0.348832 | 1.317656  | -0.052904 |
| H                               | 6.000774  | -6.685692 | -1.905458 | C                          | -1.337885 | 3.140867  | -0.108518 | Cu | 0.565181  | -1.423249 | -0.257383 |
| H                               | 5.252133  | -5.403886 | -2.874941 | C                          | -0.185106 | 4.000255  | -2.499389 | C  | 3.359879  | -1.345309 | -0.910679 |
| C                               | -4.208426 | -0.604891 | 1.109490  | H                          | 0.534973  | 1.979243  | -2.706837 | C  | 4.689116  | -1.692867 | -0.859920 |
| C                               | -5.496053 | -1.093129 | 1.171160  | C                          | -1.496140 | 4.461892  | -0.527577 | C  | 5.159153  | -2.557671 | 0.172269  |
| C                               | -5.824309 | -2.318844 | 0.527122  | H                          | -1.786741 | 2.799936  | 0.819940  | C  | 4.177124  | -3.030266 | 1.093046  |
| C                               | -4.753047 | -2.967352 | -0.149022 | C                          | -0.919549 | 4.900938  | -1.723139 | C  | 2.866872  | -2.632391 | 0.963578  |
| C                               | -3.496585 | -2.399416 | -0.155439 | H                          | 0.258230  | 4.324692  | -3.437081 | N  | 2.450508  | -1.779593 | -0.004015 |
| N                               | -3.195476 | -1.228720 | 0.458744  | H                          | -2.074101 | 5.150234  | 0.083177  | H  | 2.989956  | -0.683524 | -1.686981 |
| H                               | -3.959278 | 0.329857  | 1.600842  | H                          | -1.045812 | 5.929433  | -2.048299 | H  | 5.357761  | -1.290538 | -1.608670 |
| H                               | -6.238631 | -0.525401 | 1.716008  | C                          | 2.267004  | 1.827268  | 0.005746  | H  | 4.436316  | -3.699224 | 1.902258  |
| H                               | -4.898381 | -3.905879 | -0.667845 | C                          | 3.424519  | 1.489377  | 0.963931  | H  | 2.109025  | -2.985085 | 1.655843  |
| H                               | -2.680604 | -2.892735 | -0.673116 | Cl                         | 4.026772  | 3.041916  | 1.651119  | N  | 6.458063  | -2.915326 | 0.264725  |
| N                               | -7.077135 | -2.835126 | 0.556880  | Cl                         | 4.763529  | 0.663752  | 0.089908  | C  | 6.906637  | -3.821179 | 1.322890  |
| C                               | -7.364742 | -4.109561 | -0.098040 | Cl                         | 2.861304  | 0.427168  | 2.309321  | H  | 6.481489  | -4.824093 | 1.198115  |
| H                               | -6.768304 | -4.923981 | 0.330036  | H                          | 2.633679  | 2.544871  | -0.731821 | H  | 7.992051  | -3.896707 | 1.284474  |
| H                               | -8.418405 | -4.348346 | 0.040624  | H                          | 1.466081  | 2.281945  | 0.589812  | H  | 6.622767  | -3.440380 | 2.309061  |
| H                               | -7.162084 | -4.060697 | -1.174281 | C                          | 3.159563  | -5.844241 | -0.724236 | C  | 7.422386  | -2.466109 | -0.740641 |
| C                               | -8.143509 | -2.141692 | 1.276931  | H                          | 2.324244  | -6.520876 | -0.540390 | H  | 7.477883  | -1.372674 | -0.771119 |
| H                               | -8.296209 | -1.129262 | 0.885945  | H                          | 3.556366  | -6.014990 | -1.730813 | H  | 8.406241  | -2.854043 | -0.482691 |
| H                               | -9.072232 | -2.697126 | 1.153194  | H                          | 3.966241  | -6.037460 | -0.011027 | H  | 7.155104  | -2.831293 | -1.738680 |
| H                               | -7.924552 | -2.070018 | 2.349228  | C                          | 2.725706  | -4.421688 | -0.610809 | C  | -2.434150 | 2.122353  | 0.313380  |
|                                 |           |           |           | O                          | 1.504958  | -4.090673 | -0.455937 | C  | -2.125655 | 2.911918  | 1.429895  |
|                                 |           |           |           | O                          | 3.574369  | -3.459656 | -0.676521 | C  | -3.488347 | 2.500503  | -0.531350 |
| <b>M<sub>1RA-II</sub> (OAc)</b> |           |           |           |                            |           |           |           | C  | -2.875606 | 4.055573  | 1.709723  |
| O                               | 1.837967  | 0.650139  | -0.665439 |                            |           |           |           | H  | -1.304883 | 2.620273  | 2.078527  |
| C                               | 0.549342  | 0.157317  | -0.506992 | <b>M<sub>1RA-TS9</sub></b> |           |           |           | C  | -4.236995 | 3.641518  | -0.241731 |
| O                               | 0.525227  | -1.126113 | -0.447858 | C                          | -3.844238 | -1.745101 | -0.239863 | C  | -3.714661 | 1.905402  | -1.409637 |
| C                               | -3.898012 | -0.277073 | -1.026077 | O                          | -3.374277 | -0.404342 | -0.085107 | H  | -3.935932 | 4.422685  | 0.878015  |
| C                               | -5.223663 | -0.586735 | -0.865136 | C                          | -2.043041 | -0.206350 | -0.173699 |    |           |           |           |
| C                               | -5.771900 | -0.729451 | 0.446968  | O                          | -1.323839 | -1.230229 | -0.439494 |    |           |           |           |

|                                                         |           |           |           |                           |           |           |           |                                             |           |           |           |
|---------------------------------------------------------|-----------|-----------|-----------|---------------------------|-----------|-----------|-----------|---------------------------------------------|-----------|-----------|-----------|
| H                                                       | -2.630865 | 4.656467  | 2.581085  | C                         | -4.320058 | 0.191582  | 0.145671  | H                                           | -5.251740 | -7.312515 | -1.368908 |
| H                                                       | -5.054452 | 3.924418  | -0.899017 | Cl                        | -4.628761 | -1.005260 | 1.451572  | H                                           | -6.202601 | -5.808806 | -1.240705 |
| H                                                       | -4.520423 | 5.311489  | 1.097269  | Cl                        | -4.741350 | -0.540956 | -1.442892 | C                                           | -3.819992 | -6.774848 | 0.638729  |
| H                                                       | -3.452078 | -2.387941 | 0.551897  | Cl                        | -5.344104 | 1.649628  | 0.420106  | H                                           | -4.022463 | -6.458829 | 1.664615  |
| H                                                       | -3.563884 | -2.148714 | -1.215059 | O                         | -0.426369 | 4.562673  | -0.469193 | H                                           | -4.308344 | -7.725052 | 0.440890  |
| C                                                       | -5.371967 | -1.712861 | -0.139156 | C                         | 0.802254  | 4.583683  | -0.104940 | H                                           | -2.737783 | -6.882827 | 0.503354  |
| Cl                                                      | -6.084180 | -0.701568 | -1.447077 | C                         | 1.563753  | 5.857691  | 0.026674  | C                                           | 4.000062  | -0.732539 | -0.899075 |
| Cl                                                      | -5.898523 | -1.070791 | 1.457550  | H                         | 1.448766  | 6.226698  | 1.052634  | C                                           | 5.259022  | -1.269990 | -1.063072 |
| Cl                                                      | -5.952112 | -3.410272 | -0.320107 | H                         | 2.625603  | 5.686617  | -0.161009 | C                                           | 5.809730  | -2.112456 | -0.057373 |
| <b>M<sub>1RA</sub>-TS<sub>9</sub> (OAc<sup>-</sup>)</b> |           |           |           | H                         | 1.167551  | 6.609133  | -0.659044 | C                                           | 4.986744  | -2.332676 | 1.082223  |
| C                                                       | -2.857749 | 0.654454  | 0.161966  | O                         | 1.326663  | 3.450403  | 0.163711  | C                                           | 3.739154  | -1.749942 | 1.156003  |
| O                                                       | -2.038210 | -0.481822 | -0.089809 | <b>M<sub>1RA</sub>-12</b> |           |           |           | N                                           | 3.221585  | -0.952912 | 0.189050  |
| C                                                       | -0.696984 | -0.356311 | 0.075963  | N                         | -2.493971 | 1.081241  | 0.233484  | H                                           | 3.579711  | -0.091668 | -1.667004 |
| O                                                       | -0.164943 | 0.768830  | 0.340690  | O                         | -0.879145 | 2.606175  | 0.637426  | H                                           | 5.807170  | -1.036152 | -1.966223 |
| C                                                       | 3.288511  | -0.846000 | -1.102003 | C                         | 0.442561  | 2.984423  | 1.008385  | H                                           | 5.316514  | -2.954268 | 1.904123  |
| C                                                       | 4.649641  | -0.629223 | -1.091641 | C                         | 1.043298  | 3.910498  | -0.059741 | H                                           | 3.111610  | -1.919528 | 2.024804  |
| C                                                       | 5.367059  | -0.694470 | 0.137429  | H                         | 1.094482  | 2.117674  | 1.133549  | N                                           | 7.039343  | -2.670512 | -0.177928 |
| C                                                       | 4.596703  | -0.991612 | 1.298473  | H                         | 0.379356  | 3.532130  | 1.951039  | C                                           | 7.569781  | -3.521398 | 0.885413  |
| C                                                       | 3.238029  | -1.193258 | 1.184707  | Cl                        | 2.688046  | 4.378125  | 0.505567  | H                                           | 6.922516  | -4.388158 | 1.063140  |
| N                                                       | 2.579055  | -1.126369 | 0.009974  | Cl                        | 1.167135  | 3.060887  | -1.643951 | H                                           | 8.552870  | -3.885094 | 0.589491  |
| H                                                       | 2.724924  | -0.797794 | -2.029587 | Cl                        | 0.042289  | 5.391395  | -0.266109 | H                                           | 7.675598  | -2.969259 | 1.826960  |
| H                                                       | 5.150652  | -0.411666 | -2.025294 | C                         | -4.759203 | 1.668216  | 0.835458  | C                                           | 7.854228  | -2.407614 | -1.362482 |
| H                                                       | 5.054454  | -1.062648 | 2.276101  | C                         | -3.567939 | 2.017362  | 0.185795  | H                                           | 8.089314  | -1.340834 | -1.459552 |
| H                                                       | 2.633723  | -1.418403 | 2.058998  | C                         | -3.485081 | 3.215912  | -0.532837 | H                                           | 8.790530  | -2.957623 | -1.277635 |
| N                                                       | 6.704834  | -0.485584 | 0.198344  | C                         | -4.586666 | 4.071807  | -0.571489 | H                                           | 7.345738  | -2.734516 | -2.276945 |
| C                                                       | 7.404716  | -0.558194 | 1.479565  | C                         | -5.774702 | 3.732769  | 0.081136  | <b>M<sub>1RA</sub>-12 (OAc<sup>-</sup>)</b> |           |           |           |
| H                                                       | 7.312568  | -1.553667 | 1.929712  | C                         | -5.859028 | 2.524595  | 0.777448  | C                                           | -2.934311 | 0.630375  | 0.144138  |
| H                                                       | 8.461942  | -0.352523 | 1.317741  | H                         | -4.815110 | 0.732942  | 1.384565  | O                                           | -2.093930 | -0.515227 | -0.002790 |
| H                                                       | 7.016400  | 0.180460  | 2.190612  | H                         | -2.575547 | 3.472135  | -1.062755 | C                                           | -0.768330 | -0.349897 | 0.145830  |
| C                                                       | 7.458767  | -0.178538 | -1.015514 | H                         | -4.516169 | 5.002961  | -1.126234 | O                                           | -0.234643 | 0.772706  | 0.361070  |
| H                                                       | 7.103613  | 0.746991  | -1.483993 | H                         | -6.628906 | 4.402259  | 0.042630  | C                                           | 3.412022  | -0.807966 | -1.074125 |
| H                                                       | 8.508815  | -0.049244 | -0.756722 | H                         | -6.778576 | 2.248603  | 1.285340  | C                                           | 4.776961  | -0.583519 | -1.105162 |
| H                                                       | 7.383942  | -0.989347 | -1.749695 | O                         | -0.384943 | 0.362908  | 0.543331  | C                                           | 5.527299  | -0.647994 | 0.100297  |
| N                                                       | 0.030386  | -1.442868 | -0.046315 | C                         | -1.194402 | 1.305444  | 0.466039  | C                                           | 4.786557  | -0.951095 | 1.275046  |
| H                                                       | 1.280459  | -1.278868 | -0.030221 | H                         | -2.746481 | 0.077885  | 0.188817  | C                                           | 3.421493  | -1.158829 | 1.188244  |
| Cu                                                      | -0.466115 | 2.585859  | -0.285382 | Cu                        | 1.450597  | -0.195177 | 0.331170  | N                                           | 2.715110  | -1.095106 | 0.042692  |
| C                                                       | -0.474437 | -2.765225 | -0.143696 | C                         | -2.773856 | -2.671935 | 0.905443  | H                                           | 2.838335  | -0.756790 | -1.997327 |
| C                                                       | 0.081989  | -3.612992 | -1.112868 | C                         | -3.087416 | -4.020445 | 0.834562  | H                                           | 5.251127  | -0.361475 | -2.052447 |
| C                                                       | -1.424484 | -3.275160 | 0.755084  | C                         | -3.983321 | -4.453343 | -0.179090 | H                                           | 5.267537  | -1.023669 | 2.241994  |
| C                                                       | -0.323752 | -4.945962 | -1.195916 | C                         | -4.512435 | -3.475601 | -1.062983 | H                                           | 2.854663  | -1.390236 | 2.087697  |
| H                                                       | 0.825119  | -3.219237 | -1.799943 | C                         | -4.128972 | -2.154703 | -0.891688 | N                                           | 6.870972  | -0.433304 | 0.127570  |
| C                                                       | -1.828359 | -4.606826 | 0.661658  | N                         | -3.277707 | -1.748961 | 0.066953  | C                                           | 7.600824  | -0.505218 | 1.389804  |
| H                                                       | -1.834523 | -2.632862 | 1.526902  | H                         | -2.088760 | -2.313316 | 1.667449  | H                                           | 7.525390  | -1.501570 | 1.842599  |
| C                                                       | -1.282792 | -5.447882 | -0.312797 | H                         | -2.641213 | -4.707966 | 1.540433  | H                                           | 8.653427  | -0.294496 | 1.204044  |
| H                                                       | 0.111303  | -5.591265 | -1.953974 | H                         | -5.205691 | -3.729624 | -1.853067 | H                                           | 7.227726  | 0.229565  | 2.113769  |
| H                                                       | -2.565921 | -4.990318 | 1.361280  | H                         | -4.520938 | -1.385966 | -1.550530 | C                                           | 7.590536  | -0.124159 | -1.104151 |
| H                                                       | -1.597793 | -6.485214 | -0.378199 | N                         | -4.325950 | -5.774967 | -0.302443 | H                                           | 7.221755  | 0.800121  | -1.565994 |
| H                                                       | -2.745179 | 1.411699  | -0.623832 | C                         | -5.200331 | -6.227411 | -1.385520 | H                                           | 8.647168  | 0.008885  | -0.873954 |
| H                                                       | -2.641331 | 1.092073  | 1.140137  | H                         | -4.807185 | -5.888053 | -2.346746 | H                                           | 7.500600  | -0.934228 | -1.838366 |

|                                                               |           |           |           |                                        |           |           |           |                           |           |           |           |
|---------------------------------------------------------------|-----------|-----------|-----------|----------------------------------------|-----------|-----------|-----------|---------------------------|-----------|-----------|-----------|
| N                                                             | -0.032747 | -1.451624 | 0.064833  | C                                      | -0.424288 | 1.725659  | -0.256179 | C                         | -0.804505 | -0.052752 | -0.983950 |
| H                                                             | 1.022911  | -1.289920 | 0.052092  | H                                      | -2.168856 | 2.481652  | 0.265328  | O                         | -0.614384 | -0.677032 | -2.097455 |
| Cu                                                            | -0.552433 | 2.612196  | -0.253665 | <b>M<sub>1RA-6'</sub></b>              |           |           |           | O                         | -1.401464 | -0.645209 | -0.007849 |
| C                                                             | -0.488754 | -2.796165 | -0.062312 | C                                      | -0.067635 | -0.166022 | -0.970086 | C                         | -1.699420 | -2.072869 | -0.039730 |
| C                                                             | 0.182848  | -3.626619 | -0.968515 | O                                      | -0.230882 | -0.471641 | -2.297826 | C                         | -3.191801 | -2.252887 | 0.260348  |
| C                                                             | -1.516537 | -3.313235 | 0.736004  | O                                      | -0.829052 | -0.956215 | -0.138594 | H                         | -1.098204 | -2.526492 | 0.748271  |
| C                                                             | -0.186652 | -4.966950 | -1.086596 | C                                      | -2.238307 | -0.908963 | -0.351725 | H                         | -1.454657 | -2.498688 | -1.010649 |
| H                                                             | 0.984866  | -3.218833 | -1.575888 | C                                      | -2.840208 | -2.229629 | 0.139253  | Cl                        | -3.502530 | -4.021931 | 0.250086  |
| C                                                             | -1.886355 | -4.651669 | 0.600689  | H                                      | -2.473593 | -0.797001 | -1.412391 | Cl                        | -4.187000 | -1.448955 | -1.005551 |
| H                                                             | -2.013323 | -2.679663 | 1.461490  | H                                      | -2.684523 | -0.089041 | 0.218059  | Cl                        | -3.607103 | -1.571421 | 1.869590  |
| C                                                             | -1.225761 | -5.482497 | -0.308271 | Cl                                     | -4.620792 | -2.136151 | -0.127065 | C                         | 2.354948  | -1.713018 | -0.672849 |
| H                                                             | 0.336599  | -5.605373 | -1.792486 | Cl                                     | -2.512970 | -2.467485 | 1.895397  | C                         | 3.632483  | -2.050490 | -0.259391 |
| H                                                             | -2.686723 | -5.047344 | 1.219246  | Cl                                     | -2.170554 | -3.623637 | -0.779963 | C                         | 4.589046  | -1.025410 | -0.031628 |
| H                                                             | -1.514985 | -6.524834 | -0.404532 | C                                      | 1.704002  | -1.091684 | 0.539317  | C                         | 4.137042  | 0.300803  | -0.265520 |
| H                                                             | -2.783298 | 1.332268  | -0.683815 | C                                      | 3.013941  | -1.295089 | 0.861943  | C                         | 2.832531  | 0.516517  | -0.675448 |
| H                                                             | -2.758896 | 1.125520  | 1.102401  | C                                      | 4.061254  | -0.804335 | 0.021139  | N                         | 1.922568  | -0.454673 | -0.886777 |
| C                                                             | -4.390266 | 0.152647  | 0.094400  | C                                      | 3.644109  | -0.101954 | -1.154561 | H                         | 1.628635  | -2.505161 | -0.846659 |
| Cl                                                            | -4.742621 | -0.973749 | 1.450067  | C                                      | 2.319706  | 0.059369  | -1.430566 | H                         | 3.879588  | -3.094798 | -0.117557 |
| Cl                                                            | -4.741135 | -0.667812 | -1.467019 | N                                      | 1.347766  | -0.429152 | -0.601471 | H                         | 4.792370  | 1.151399  | -0.129367 |
| Cl                                                            | -5.427883 | 1.616964  | 0.248737  | H                                      | 0.898734  | -1.444830 | 1.163651  | H                         | 2.495387  | 1.536998  | -0.848927 |
| O                                                             | -0.501217 | 4.587466  | -0.434541 | H                                      | 3.228484  | -1.835883 | 1.772709  | N                         | 5.856602  | -1.295568 | 0.387834  |
| C                                                             | 0.726255  | 4.599728  | -0.065576 | H                                      | 4.359495  | 0.311412  | -1.851234 | C                         | 6.292310  | -2.677216 | 0.564462  |
| C                                                             | 1.497580  | 5.865097  | 0.076743  | H                                      | 1.981195  | 0.576745  | -2.317623 | H                         | 6.258979  | -3.238937 | -0.377779 |
| H                                                             | 1.394975  | 6.219108  | 1.109354  | N                                      | 5.354442  | -0.988276 | 0.315647  | H                         | 7.319180  | -2.681190 | 0.927996  |
| H                                                             | 2.556412  | 5.688323  | -0.122722 | C                                      | 5.745591  | -1.700212 | 1.537524  | H                         | 5.670110  | -3.201361 | 1.299183  |
| H                                                             | 1.100791  | 6.629286  | -0.594279 | H                                      | 5.371265  | -2.728730 | 1.527430  | C                         | 6.818333  | -0.212144 | 0.564827  |
| O                                                             | 1.237982  | 3.458535  | 0.198571  | H                                      | 6.831828  | -1.726114 | 1.595249  | H                         | 6.460302  | 0.523603  | 1.294375  |
| <b>M<sub>1RA-13/M<sub>1-9</sub>/ M<sub>2RA-10</sub></sub></b> |           |           |           | H                                      | 5.361406  | -1.190286 | 2.426602  | H                         | 7.755308  | -0.626426 | 0.935478  |
| N                                                             | -1.744002 | 1.586478  | 0.054026  | C                                      | 6.402018  | -0.471873 | -0.572287 | H                         | 7.023141  | 0.310844  | -0.378125 |
| O                                                             | 0.153402  | 0.553503  | -0.662752 | H                                      | 6.364424  | 0.620919  | -0.628764 | C                         | -1.173315 | 3.871611  | -0.977549 |
| C                                                             | 1.533970  | 0.612378  | -0.996979 | H                                      | 7.372037  | -0.766555 | -0.177423 | C                         | -0.688713 | 3.342835  | 0.232804  |
| C                                                             | 2.353920  | -0.271755 | -0.045980 | H                                      | 6.298290  | -0.884432 | -1.580536 | C                         | -0.472944 | 4.182217  | 1.344214  |
| H                                                             | 1.899226  | 1.637939  | -0.932375 | C                                      | -1.250977 | 3.827700  | -0.943349 | C                         | -0.740034 | 5.540972  | 1.239368  |
| H                                                             | 1.657297  | 0.232011  | -2.013525 | C                                      | -0.752807 | 3.280590  | 0.250253  | C                         | -1.223800 | 6.066112  | 0.036127  |
| Cl                                                            | 4.085686  | -0.125889 | -0.529076 | C                                      | -0.688592 | 4.069390  | 1.410618  | C                         | -1.439907 | 5.233825  | -1.066355 |
| Cl                                                            | 2.159545  | 0.266733  | 1.661363  | C                                      | -1.117110 | 5.392794  | 1.376845  | H                         | -1.342865 | 3.229845  | -1.833416 |
| Cl                                                            | 1.849264  | -1.999201 | -0.175551 | C                                      | -1.612890 | 5.935526  | 0.187356  | H                         | -0.099399 | 3.760673  | 2.270861  |
| C                                                             | -4.010158 | 0.819280  | 0.012744  | C                                      | -1.678633 | 5.153450  | -0.969049 | H                         | -0.573329 | 6.191125  | 2.091798  |
| C                                                             | -2.643242 | 0.493950  | 0.015965  | H                                      | -1.303816 | 3.224138  | -1.841846 | H                         | -1.433820 | 7.128521  | -0.042004 |
| C                                                             | -2.258019 | -0.854284 | 0.027505  | H                                      | -0.302632 | 3.634306  | 2.326079  | H                         | -1.816749 | 5.647439  | -1.995811 |
| C                                                             | -3.236747 | -1.850371 | 0.017431  | H                                      | -1.066462 | 6.000526  | 2.274868  | O                         | -0.053294 | 1.311275  | 1.378227  |
| C                                                             | -4.594707 | -1.529298 | 0.009376  | H                                      | -1.947999 | 6.968180  | 0.161688  | C                         | -0.400677 | 1.931037  | 0.427521  |
| C                                                             | -4.974786 | -0.184868 | 0.011821  | H                                      | -2.064511 | 5.576380  | -1.891312 | O                         | -0.546405 | 1.203918  | -0.900494 |
| H                                                             | -4.308055 | 1.864449  | 0.009873  | O                                      | 0.128332  | 1.342614  | 1.356600  | H                         | 0.119532  | -0.254965 | -2.598122 |
| H                                                             | -1.212878 | -1.127518 | 0.049160  | C                                      | -0.288143 | 1.879474  | 0.355847  | <b>M<sub>1RA-7'</sub></b> |           |           |           |
| H                                                             | -2.924123 | -2.890750 | 0.024754  | O                                      | -0.378004 | 1.219603  | -0.862128 | C                         | -0.120275 | 1.338145  | 0.547233  |
| H                                                             | -5.345679 | -2.313405 | 0.005315  | H                                      | -0.620769 | 0.289827  | -2.761944 | O                         | -0.550972 | 2.271768  | 1.165740  |
| H                                                             | -6.026163 | 0.087848  | 0.009397  | <b>M<sub>1RA-TS<sub>4</sub>'</sub></b> |           |           |           | O                         | -0.782048 | 0.547010  | -0.310080 |
| O                                                             | 0.165994  | 2.790292  | -0.191603 | C                                      | -0.120275 | 1.338145  | 0.547233  | O                         | -0.782048 | 0.547010  | -0.310080 |
|                                                               |           |           |           |                                        |           |           |           | C                         | -2.154563 | 0.858626  | -0.570001 |

|                             |           |           |           |                           |           |           |           |                          |           |           |           |
|-----------------------------|-----------|-----------|-----------|---------------------------|-----------|-----------|-----------|--------------------------|-----------|-----------|-----------|
| C                           | -3.039102 | -0.316374 | -0.133613 | H                         | -6.514007 | 1.892194  | -1.763177 | C                        | -1.054103 | -3.622450 | 0.315370  |
| H                           | -2.264250 | 1.003843  | -1.646220 | C                         | 2.986205  | 2.924806  | 0.544991  | C                        | -0.429667 | -3.063795 | -0.810502 |
| H                           | -2.455684 | 1.759250  | -0.033403 | C                         | 2.075644  | 2.858606  | -0.524467 | C                        | -0.233094 | -3.848058 | -1.956861 |
| Cl                          | -4.739886 | 0.118524  | -0.537094 | C                         | 2.172998  | 3.753028  | -1.607958 | C                        | -0.655126 | -5.175288 | -1.979256 |
| Cl                          | -2.891228 | -0.601920 | 1.639232  | C                         | 3.168874  | 4.721609  | -1.608478 | C                        | -1.275514 | -5.729455 | -0.855571 |
| Cl                          | -2.582362 | -1.822082 | -1.009939 | C                         | 4.073699  | 4.792328  | -0.543072 | C                        | -1.473966 | -4.952050 | 0.288696  |
| C                           | 3.498055  | -0.537731 | 1.048171  | C                         | 3.986135  | 3.893305  | 0.523641  | H                        | -1.209128 | -3.018462 | 1.202564  |
| C                           | 3.271374  | 0.172617  | -0.141669 | H                         | 2.933802  | 2.201120  | 1.353165  | H                        | 0.250805  | -3.404217 | -2.820302 |
| C                           | 4.257902  | 0.205260  | -1.140967 | H                         | 1.464348  | 3.685190  | -2.426439 | H                        | -0.500561 | -5.777402 | -2.869701 |
| C                           | 5.460752  | -0.467744 | -0.950688 | H                         | 3.242482  | 5.421052  | -2.434935 | H                        | -1.604063 | -6.764666 | -0.871930 |
| C                           | 5.684858  | -1.174970 | 0.234788  | H                         | 4.852543  | 5.549249  | -0.547774 | H                        | -1.956471 | -5.382088 | 1.161408  |
| C                           | 4.704832  | -1.209478 | 1.230696  | H                         | 4.700726  | 3.945322  | 1.338866  | O                        | 0.602530  | -1.149057 | -1.805216 |
| H                           | 2.737808  | -0.565316 | 1.820256  | O                         | 0.325976  | 1.512265  | -1.495204 | C                        | 0.048541  | -1.648051 | -0.842152 |
| H                           | 4.069625  | 0.758195  | -2.054894 | C                         | 1.018053  | 1.857085  | -0.589627 | O                        | -0.200106 | -1.015499 | 0.324940  |
| H                           | 6.223150  | -0.441931 | -1.723070 | O                         | 0.787045  | 1.284175  | 0.767553  | H                        | -1.192101 | -0.307583 | 2.592387  |
| H                           | 6.623985  | -1.700202 | 0.382179  | H                         | 0.364550  | 0.395114  | 2.825537  | N                        | -1.764385 | -0.964314 | 3.211929  |
| H                           | 4.880910  | -1.760284 | 2.149375  | N                         | 3.029882  | -0.083275 | 2.275065  | N                        | -2.970441 | -0.820021 | 3.058806  |
| O                           | 1.716247  | 1.499104  | -1.407477 | N                         | 3.999380  | -0.644064 | 1.877506  | N                        | -4.113253 | -0.763702 | 2.993511  |
| C                           | 2.014025  | 0.900654  | -0.401172 | N                         | 4.961248  | -1.211532 | 1.487230  |                          |           |           |           |
| O                           | 1.160073  | 0.872812  | 0.702033  |                           |           |           |           |                          |           |           |           |
|                             |           |           |           | <b>M<sub>1RA-6"</sub></b> |           |           |           | <b>M<sub>1RB-1</sub></b> |           |           |           |
| <b>M<sub>1RA-TS4"</sub></b> |           |           |           | C                         | 0.098809  | 0.407092  | 0.593700  | C                        | 1.796277  | 1.505149  | -0.074677 |
| C                           | 0.461010  | 0.053291  | 0.982769  | O                         | -0.243774 | 0.709911  | 1.772398  | O                        | 1.789325  | 1.456691  | 1.132731  |
| O                           | 0.145366  | -0.309998 | 2.180952  | O                         | -0.478881 | 1.126565  | -0.495841 | N                        | 1.012753  | 2.361167  | -0.887792 |
| O                           | 0.565892  | -0.818851 | 0.043079  | C                         | -1.049205 | 2.375763  | -0.181235 | N                        | 0.225991  | 3.085066  | -0.246875 |
| C                           | 0.214731  | -2.206452 | 0.291676  | C                         | -2.511875 | 2.427746  | -0.651606 | N                        | -0.529949 | 3.789363  | 0.212977  |
| C                           | 1.101914  | -3.066737 | -0.612613 | H                         | -0.510082 | 3.176104  | -0.699640 | O                        | 2.569197  | 0.791606  | -0.912269 |
| H                           | -0.840415 | -2.326513 | 0.043906  | H                         | -1.031870 | 2.553480  | 0.896485  | C                        | -1.519186 | -1.061301 | -1.166916 |
| H                           | 0.400970  | -2.465041 | 1.333310  | H                         | -1.031870 | 2.553480  | 0.896485  | C                        | -2.903431 | -1.133490 | -1.123350 |
| Cl                          | 0.611836  | -4.776799 | -0.320078 | Cl                        | -3.144259 | 4.083630  | -0.288981 | C                        | -3.596716 | -0.602986 | -0.004428 |
| Cl                          | 2.826142  | -2.827004 | -0.177963 | Cl                        | -3.519481 | 1.209117  | 0.206326  | C                        | -2.781719 | -0.040978 | 1.012357  |
| Cl                          | 0.844564  | -2.658610 | -2.347826 | Cl                        | -2.628977 | 2.133913  | -2.430570 | C                        | -1.404001 | -0.026307 | 0.855044  |
| C                           | -2.988830 | 0.283641  | 1.546217  | C                         | 2.425219  | 0.201257  | 1.465779  | N                        | -0.744300 | -0.519330 | -0.209495 |
| C                           | -4.361264 | 0.455202  | 1.467100  | C                         | 3.790478  | 0.290233  | 1.426491  | H                        | -0.998068 | -1.470502 | -2.031241 |
| C                           | -4.970901 | 0.638517  | 0.197907  | C                         | 4.445550  | 0.774724  | 0.253863  | H                        | -3.431639 | -1.597904 | -1.946411 |
| C                           | -4.090123 | 0.626877  | -0.915751 | C                         | 3.595823  | 1.139674  | -0.831879 | H                        | -3.211928 | 0.380809  | 1.911829  |
| C                           | -2.731340 | 0.449495  | -0.712534 | C                         | 2.234793  | 1.007202  | -0.725762 | H                        | -0.785999 | 0.414580  | 1.635001  |
| N                           | -2.152952 | 0.277249  | 0.491623  | N                         | 1.650198  | 0.546529  | 0.407391  | N                        | -4.960015 | -0.628051 | 0.086802  |
| H                           | -2.529195 | 0.141597  | 2.522790  | H                         | 1.889637  | -0.134756 | 2.343704  | C                        | -5.619442 | -0.178545 | 1.307685  |
| H                           | -4.945871 | 0.444793  | 2.378230  | H                         | 4.348191  | -0.004949 | 2.304313  | H                        | -5.372915 | 0.865404  | 1.532354  |
| H                           | -4.457163 | 0.758232  | -1.925729 | H                         | 3.998751  | 1.524564  | -1.758295 | H                        | -6.698588 | -0.245840 | 1.172363  |
| H                           | -2.058874 | 0.450864  | -1.566536 | H                         | 1.565266  | 1.258091  | -1.533978 | H                        | -5.343254 | -0.790516 | 2.176982  |
| N                           | -6.315392 | 0.814409  | 0.057427  | N                         | 5.786359  | 0.883235  | 0.179928  | C                        | -5.750696 | -1.299486 | -0.938490 |
| C                           | -7.178560 | 0.840214  | 1.233134  | C                         | 6.625682  | 0.499938  | 1.317029  | H                        | -5.563213 | -2.381706 | -0.965271 |
| H                           | -6.898996 | 1.647036  | 1.921942  | H                         | 6.508556  | -0.562825 | 1.556054  | H                        | -6.808836 | -1.140172 | -0.730985 |
| H                           | -8.207062 | 1.008111  | 0.915379  | H                         | 7.668160  | 0.683050  | 1.062444  | H                        | -5.538799 | -0.891124 | -1.932604 |
| H                           | -7.141657 | -0.108078 | 1.783625  | H                         | 6.379867  | 1.089488  | 2.206738  | C                        | 3.394517  | -0.202247 | -0.351680 |
| C                           | -6.896949 | 0.990584  | -1.268864 | C                         | 6.421949  | 1.375890  | -1.043418 | C                        | 2.824843  | -1.371959 | 0.143359  |
| H                           | -6.688652 | 0.130355  | -1.916635 | H                         | 6.101373  | 2.397973  | -1.272519 | C                        | 4.769941  | -0.004312 | -0.394901 |
| H                           | -7.977903 | 1.087801  | -1.173218 | H                         | 7.501415  | 1.377528  | -0.903443 | C                        | 3.673124  | -2.372874 | 0.620150  |
|                             |           |           |           | H                         | 6.185187  | 0.733778  | -1.898795 | H                        | 1.744807  | -1.482651 | 0.148090  |



|                            |           |           |           |                            |           |           |           |                          |           |           |           |
|----------------------------|-----------|-----------|-----------|----------------------------|-----------|-----------|-----------|--------------------------|-----------|-----------|-----------|
| C                          | 5.605521  | -1.017454 | 0.082230  | N                          | -1.473488 | 3.592772  | 1.124106  | N                        | -4.823564 | -0.574230 | -0.060236 |
| H                          | 5.172090  | 0.920600  | -0.795224 | O                          | -1.342894 | -0.636107 | -0.243131 | C                        | -5.788576 | 0.170209  | 0.752789  |
| C                          | 5.059946  | -2.198483 | 0.590760  | C                          | 1.227617  | -0.530484 | 0.783823  | H                        | -5.701912 | 1.247640  | 0.577769  |
| H                          | 3.247337  | -3.291619 | 1.012354  | C                          | 2.555823  | -0.847158 | 0.891373  | H                        | -6.794634 | -0.142017 | 0.479410  |
| H                          | 6.682106  | -0.879133 | 0.055685  | C                          | 3.500734  | -0.320288 | -0.041823 | H                        | -5.640962 | -0.027225 | 1.820053  |
| H                          | 5.713492  | -2.982475 | 0.961221  | C                          | 2.972209  | 0.531898  | -1.056444 | C                        | -5.316080 | -1.568546 | -1.017058 |
| <b>M<sub>IRB-TS1</sub></b> |           |           |           | C                          | 1.628838  | 0.804833  | -1.097647 | H                        | -4.854901 | -2.545025 | -0.839171 |
| C                          | 1.095375  | 0.827647  | 0.317110  | N                          | 0.766842  | 0.283471  | -0.197774 | H                        | -6.392803 | -1.671342 | -0.894424 |
| O                          | 1.125020  | 1.486630  | 1.339036  | H                          | 0.488652  | -0.916854 | 1.472503  | H                        | -5.108901 | -1.263158 | -2.048656 |
| N                          | 1.247439  | 1.418774  | -1.020114 | H                          | 2.860388  | -1.505030 | 1.693403  | C                        | 2.740428  | -0.748362 | 0.216431  |
| N                          | 0.998956  | 2.629513  | -1.057127 | H                          | 3.609368  | 0.979639  | -1.806435 | C                        | 3.245674  | -2.042525 | 0.045348  |
| N                          | 0.786262  | 3.739293  | -1.187572 | H                          | 1.173670  | 1.446241  | -1.841995 | C                        | 3.606882  | 0.345824  | 0.312196  |
| O                          | 1.544353  | -0.491060 | 0.233690  | N                          | 4.814137  | -0.611930 | 0.034347  | C                        | 4.622154  | -2.245153 | -0.029486 |
| C                          | -1.357483 | -0.515453 | -0.861201 | C                          | 5.749384  | -0.080553 | -0.958694 | H                        | 2.550864  | -2.873256 | -0.028449 |
| C                          | -2.692313 | -0.861431 | -0.941872 | H                          | 5.783419  | 1.014126  | -0.926775 | C                        | 4.984828  | 0.123500  | 0.230820  |
| C                          | -3.603752 | -0.390351 | 0.044797  | H                          | 6.745902  | -0.462969 | -0.744219 | H                        | 3.220929  | 1.344324  | 0.462617  |
| C                          | -3.049976 | 0.425038  | 1.070230  | H                          | 5.470552  | -0.393344 | -1.970583 | C                        | 5.501070  | -1.161858 | 0.061114  |
| C                          | -1.697719 | 0.711473  | 1.057796  | C                          | 5.322900  | -1.472496 | 1.103821  | H                        | 5.005898  | -3.252727 | -0.161443 |
| N                          | -0.859582 | 0.257173  | 0.117719  | H                          | 4.913941  | -2.486393 | 1.028260  | H                        | 5.657188  | 0.973713  | 0.304363  |
| H                          | -0.648277 | -0.867730 | -1.605062 | H                          | 6.406814  | -1.530221 | 1.022534  | H                        | 6.573760  | -1.318917 | 0.001786  |
| H                          | -3.019869 | -1.491327 | -1.758393 | H                          | 5.072820  | -1.065726 | 2.089182  | <b>M<sub>IRB-3</sub></b> |           |           |           |
| H                          | -3.664314 | 0.828385  | 1.864430  | C                          | -2.708785 | -0.770383 | -0.211546 | C                        | -0.745281 | 0.675926  | -0.326156 |
| H                          | -1.243952 | 1.329866  | 1.828923  | C                          | -3.168012 | -2.071200 | 0.041880  | O                        | -0.997269 | 1.428867  | -1.276662 |
| N                          | -4.926312 | -0.702392 | 0.008216  | C                          | -3.628427 | 0.267725  | -0.415101 | N                        | -1.034631 | 1.266198  | 1.157940  |
| C                          | -5.822768 | -0.230673 | 1.059786  | C                          | -4.535445 | -2.332884 | 0.093532  | N                        | -1.252451 | 2.466499  | 1.127956  |
| H                          | -5.856650 | 0.864700  | 1.097448  | H                          | -2.440268 | -2.861953 | 0.196813  | N                        | -1.473488 | 3.592772  | 1.124106  |
| H                          | -6.829253 | -0.595134 | 0.857640  | C                          | -4.996849 | -0.011041 | -0.352113 | O                        | -1.342894 | -0.636107 | -0.243131 |
| H                          | -5.516229 | -0.600064 | 2.045892  | H                          | -3.280215 | 1.267137  | -0.638426 | C                        | 1.227617  | -0.530484 | 0.783823  |
| C                          | -5.454627 | -1.545499 | -1.060244 | C                          | -5.461198 | -1.302799 | -0.099411 | C                        | 2.555823  | -0.847158 | 0.891373  |
| H                          | -5.017320 | -2.551370 | -1.037335 | H                          | -4.876501 | -3.345603 | 0.290252  | C                        | 3.500734  | -0.320288 | -0.041823 |
| H                          | -6.532675 | -1.638652 | -0.936189 | H                          | -5.704111 | 0.799028  | -0.508933 | C                        | 2.972209  | 0.531898  | -1.056444 |
| H                          | -5.261597 | -1.107953 | -2.046574 | H                          | -6.527038 | -1.505814 | -0.056224 | C                        | 1.628838  | 0.804833  | -1.097647 |
| C                          | 2.910147  | -0.718686 | 0.185527  | <b>M<sub>IRB-TS2</sub></b> |           |           |           | N                        | 0.766842  | 0.283471  | -0.197774 |
| C                          | 3.283458  | -2.028376 | -0.134951 | C                          | 0.699564  | 0.537340  | 0.435958  | H                        | 0.488652  | -0.916854 | 1.472503  |
| C                          | 3.880176  | 0.253766  | 0.447505  | O                          | 1.000861  | 1.367190  | 1.284759  | H                        | 2.860388  | -1.505030 | 1.693403  |
| C                          | 4.634396  | -2.365498 | -0.193141 | N                          | 0.922171  | 1.233546  | -1.316351 | H                        | 3.609368  | 0.979639  | -1.806435 |
| H                          | 2.509960  | -2.763473 | -0.333464 | N                          | 1.209682  | 2.398769  | -1.201241 | H                        | 1.173670  | 1.446241  | -1.841995 |
| C                          | 5.230806  | -0.099589 | 0.376378  | N                          | 1.493830  | 3.515576  | -1.059386 | N                        | 4.814137  | -0.611930 | 0.034347  |
| H                          | 3.594071  | 1.264145  | 0.713304  | O                          | 1.361145  | -0.679309 | 0.263428  | C                        | 5.749384  | -0.080553 | -0.958694 |
| C                          | 5.616561  | -1.402396 | 0.058116  | C                          | -1.205249 | -0.728604 | -0.608540 | H                        | 5.783419  | 1.014126  | -0.926775 |
| H                          | 4.918266  | -3.384261 | -0.441207 | C                          | -2.536800 | -1.004818 | -0.749293 | H                        | 6.745902  | -0.462969 | -0.744219 |
| H                          | 5.983208  | 0.657766  | 0.577491  | C                          | -3.506721 | -0.329042 | 0.054910  | H                        | 5.470552  | -0.393344 | -1.970583 |
| H                          | 6.668626  | -1.665814 | 0.008425  | C                          | -2.994524 | 0.625758  | 0.985221  | C                        | 5.322900  | -1.472496 | 1.103821  |
| <b>M<sub>IRB-2</sub></b>   |           |           |           | C                          | -1.648348 | 0.850023  | 1.076434  | H                        | 4.913941  | -2.486393 | 1.028260  |
| C                          | -0.745281 | 0.675926  | -0.326156 | N                          | -0.758766 | 0.181621  | 0.299260  | H                        | 6.406814  | -1.530221 | 1.022534  |
| O                          | -0.997269 | 1.428867  | -1.276662 | H                          | -0.449411 | -1.215053 | -1.208201 | H                        | 5.072820  | -1.065726 | 2.089182  |
| N                          | -1.034631 | 1.266198  | 1.157940  | H                          | -2.828551 | -1.738000 | -1.488218 | C                        | -2.708785 | -0.770383 | -0.211546 |
| N                          | -1.252451 | 2.466499  | 1.127956  | H                          | -3.649151 | 1.185506  | 1.638156  | C                        | -3.168012 | -2.071200 | 0.041880  |
|                            |           |           |           | H                          | -1.212745 | 1.563039  | 1.763525  | C                        | -3.628427 | 0.267725  | -0.415101 |

|                                            |           |           |           |                                                         |           |           |           |                                                                |           |           |           |
|--------------------------------------------|-----------|-----------|-----------|---------------------------------------------------------|-----------|-----------|-----------|----------------------------------------------------------------|-----------|-----------|-----------|
| C                                          | -4.535445 | -2.332884 | 0.093532  | H                                                       | 1.514649  | 4.668249  | 1.309207  |                                                                |           |           |           |
| H                                          | -2.440268 | -2.861953 | 0.196813  | N                                                       | -0.793157 | 1.282707  | 1.970241  | <b>M<sub>1RB-5</sub> (oH<sub>2</sub>O) / M<sub>1RB-5</sub></b> |           |           |           |
| C                                          | -4.996849 | -0.011041 | -0.352113 | N                                                       | -1.962576 | 1.391612  | 2.147951  | C                                                              | 0.988590  | -0.203497 | -0.302414 |
| H                                          | -3.280215 | 1.267137  | -0.638426 | N                                                       | -3.130332 | 1.487663  | 2.318974  | O                                                              | 1.233794  | -1.059358 | 0.812581  |
| C                                          | -5.461198 | -1.302799 | -0.099411 |                                                         |           |           |           | O                                                              | 1.046307  | -1.017060 | -1.404733 |
| H                                          | -4.876501 | -3.345603 | 0.290252  | <b>M<sub>1RB-TS<sub>3</sub></sub> (oH<sub>2</sub>O)</b> |           |           |           | H                                                              | 1.710541  | -1.711076 | -1.247056 |
| H                                          | -5.704111 | 0.799028  | -0.508933 | C                                                       | -0.732157 | -0.193789 | -0.367373 | O                                                              | 1.849687  | 0.879884  | -0.337842 |
| H                                          | -6.527038 | -1.505814 | -0.056224 | O                                                       | -1.409913 | 1.726390  | -1.090782 | C                                                              | 5.422719  | 0.547876  | 0.464744  |
|                                            |           |           |           | O                                                       | -1.137495 | -0.512330 | -1.562577 | C                                                              | 4.046281  | 0.720738  | 0.622718  |
| <b>M<sub>1RB-4</sub> (oH<sub>2</sub>O)</b> |           |           |           | H                                                       | -1.497081 | 0.410348  | -1.864524 | C                                                              | 3.222526  | 0.625238  | -0.497433 |
| C                                          | 0.932555  | -0.601840 | -0.378591 | O                                                       | -1.417155 | -0.460910 | 0.709862  | C                                                              | 3.739651  | 0.378530  | -1.768975 |
| O                                          | 0.925372  | 3.081050  | -1.562517 | C                                                       | -5.075214 | -0.282320 | 1.018150  | C                                                              | 5.118088  | 0.202954  | -1.910598 |
| O                                          | 1.435329  | 0.465217  | -0.650820 | C                                                       | -3.732874 | 0.105679  | 1.019145  | C                                                              | 5.959114  | 0.285034  | -0.798210 |
| H                                          | 1.183211  | 2.236404  | -1.144358 | C                                                       | -2.792398 | -0.832482 | 0.619099  | H                                                              | 6.073723  | 0.622389  | 1.330466  |
| O                                          | 1.588109  | -1.701781 | -0.009056 | C                                                       | -3.110539 | -2.128899 | 0.236915  | H                                                              | 3.614507  | 0.939658  | 1.593282  |
| C                                          | 5.144732  | -1.948206 | -0.933553 | C                                                       | -4.458229 | -2.494183 | 0.242770  | H                                                              | 3.076402  | 0.333897  | -2.625081 |
| C                                          | 3.752832  | -1.948835 | -1.048395 | C                                                       | -5.436817 | -1.575051 | 0.631142  | H                                                              | 5.532492  | 0.009841  | -2.895452 |
| C                                          | 3.002516  | -1.630419 | 0.076412  | H                                                       | -5.835454 | 0.429886  | 1.323209  | H                                                              | 7.030177  | 0.151930  | -0.916338 |
| C                                          | 3.574619  | -1.319697 | 1.303351  | H                                                       | -3.417226 | 1.102491  | 1.307674  | C                                                              | -1.427318 | -0.524777 | -0.344068 |
| C                                          | 4.967963  | -1.324274 | 1.400404  | H                                                       | -2.332338 | -2.827602 | -0.050014 | C                                                              | -2.722777 | -0.104431 | -0.282286 |
| C                                          | 5.750913  | -1.636725 | 0.286159  | H                                                       | -4.738068 | -3.500267 | -0.053105 | C                                                              | -3.034141 | 1.285794  | -0.138782 |
| H                                          | 5.751734  | -2.193270 | -1.799521 | H                                                       | -6.482020 | -1.868345 | 0.635101  | C                                                              | -1.907803 | 2.165619  | -0.042133 |
| H                                          | 3.260345  | -2.192199 | -1.983984 | C                                                       | 1.514144  | -0.042755 | -1.180875 | C                                                              | -0.631801 | 1.685808  | -0.095915 |
| H                                          | 2.946466  | -1.083727 | 2.155936  | C                                                       | 2.836865  | 0.191987  | -0.984503 | N                                                              | -0.380968 | 0.354435  | -0.258337 |
| H                                          | 5.437831  | -1.084341 | 2.349098  | C                                                       | 3.343120  | 0.529469  | 0.312495  | H                                                              | -1.184230 | -1.573940 | -0.468259 |
| H                                          | 6.833391  | -1.639353 | 0.368820  | C                                                       | 2.368281  | 0.653457  | 1.365356  | H                                                              | -3.488328 | -0.866490 | -0.349993 |
| C                                          | -1.296680 | 0.227780  | -0.710291 | C                                                       | 1.058041  | 0.412475  | 1.129458  | H                                                              | -2.034820 | 3.231469  | 0.082003  |
| C                                          | -2.648547 | 0.086880  | -0.731068 | N                                                       | 0.609034  | 0.056519  | -0.132432 | H                                                              | 0.227827  | 2.332428  | -0.013222 |
| C                                          | -3.258760 | -1.169011 | -0.414036 | H                                                       | 1.098251  | -0.292770 | -2.143114 | N                                                              | -4.286980 | 1.760093  | -0.094171 |
| C                                          | -2.363150 | -2.253484 | -0.122589 | H                                                       | 3.494088  | 0.107801  | -1.837270 | C                                                              | -4.535816 | 3.196632  | 0.065995  |
| C                                          | -1.019038 | -2.065215 | -0.125722 | H                                                       | 2.654735  | 0.925296  | 2.371325  | H                                                              | -4.083003 | 3.765253  | -0.751537 |
| N                                          | -0.466162 | -0.836735 | -0.422890 | H                                                       | 0.305276  | 0.497272  | 1.899306  | H                                                              | -5.611764 | 3.363581  | 0.049179  |
| H                                          | -0.808654 | 1.158151  | -0.950809 | N                                                       | 4.640854  | 0.734452  | 0.530217  | H                                                              | -4.141821 | 3.562075  | 1.019777  |
| H                                          | -3.242041 | 0.952091  | -0.987175 | C                                                       | 5.135465  | 1.146684  | 1.851191  | C                                                              | -5.487311 | 0.923913  | -0.145974 |
| H                                          | -2.732866 | -3.238500 | 0.124603  | H                                                       | 5.029722  | 0.335456  | 2.578512  | H                                                              | -6.021402 | 0.985437  | 0.808133  |
| H                                          | -0.327006 | -2.860807 | 0.105180  | H                                                       | 6.188682  | 1.404752  | 1.762412  | H                                                              | -6.145095 | 1.289324  | -0.939869 |
| N                                          | -4.583761 | -1.323428 | -0.391679 | H                                                       | 4.593898  | 2.026373  | 2.206738  | H                                                              | -5.250288 | -0.116684 | -0.347829 |
| C                                          | -5.188148 | -2.634744 | -0.124144 | C                                                       | 5.620508  | 0.488810  | -0.536529 | C                                                              | 1.137065  | -0.592181 | 2.112422  |
| H                                          | -5.017871 | -2.940736 | 0.913189  | H                                                       | 5.513769  | 1.222529  | -1.341576 | O                                                              | 0.814811  | 0.537638  | 2.386102  |
| H                                          | -6.259981 | -2.566199 | -0.299689 | H                                                       | 6.621051  | 0.570320  | -0.117318 | C                                                              | 1.475897  | -1.693665 | 3.070421  |
| H                                          | -4.776908 | -3.393085 | -0.795346 | H                                                       | 5.488489  | -0.518602 | -0.941388 | H                                                              | 0.792932  | -2.535997 | 2.923076  |
| C                                          | -5.470045 | -0.168510 | -0.585269 | C                                                       | -2.033055 | 2.725941  | -0.530466 | H                                                              | 2.491696  | -2.053041 | 2.879579  |
| H                                          | -5.408391 | 0.204911  | -1.612464 | O                                                       | -1.966590 | 2.984493  | 0.674635  | H                                                              | 1.396971  | -1.323624 | 4.092297  |
| H                                          | -6.493860 | -0.476063 | -0.383556 | C                                                       | -2.869508 | 3.566230  | -1.484670 | N                                                              | -2.150581 | -3.820172 | -0.725655 |
| H                                          | -5.202091 | 0.633638  | 0.107916  | H                                                       | -2.286259 | 3.844626  | -2.367666 | N                                                              | -3.287199 | -3.490070 | -0.640925 |
| C                                          | 0.990284  | 4.111588  | -0.686301 | H                                                       | -3.725904 | 2.977420  | -1.832538 | N                                                              | -4.425856 | -3.166110 | -0.556497 |
| O                                          | 0.704311  | 5.228901  | -1.063587 | H                                                       | -3.234753 | 4.464916  | -0.983866 |                                                                |           |           |           |
| C                                          | 1.405662  | 3.757633  | 0.719696  | N                                                       | 1.419787  | -2.908812 | -1.003248 | <b>M<sub>1RB-4</sub> (iH<sub>2</sub>O)</b>                     |           |           |           |
| H                                          | 0.648924  | 3.107936  | 1.180092  | N                                                       | 2.545534  | -2.881549 | -0.628990 | C                                                              | 0.565615  | -0.670400 | 0.272249  |
| H                                          | 2.353838  | 3.209554  | 0.716146  | N                                                       | 3.670015  | -2.834975 | -0.258236 | O                                                              | 1.657948  | 2.173670  | 0.351610  |

|                                                           |           |           |           |                                            |           |           |           |                                            |           |           |           |
|-----------------------------------------------------------|-----------|-----------|-----------|--------------------------------------------|-----------|-----------|-----------|--------------------------------------------|-----------|-----------|-----------|
| O                                                         | 0.964259  | -0.783186 | 1.409685  | H                                          | 1.085474  | 0.264745  | 2.439781  | O                                          | 2.005028  | 0.668100  | -0.742182 |
| H                                                         | 1.126314  | 0.692261  | 2.747525  | O                                          | 1.352372  | -0.430891 | -0.657517 | C                                          | 5.611597  | 0.804014  | -0.054873 |
| O                                                         | 1.238614  | -0.954486 | -0.840929 | C                                          | 4.989225  | -0.445016 | -1.191591 | C                                          | 4.235374  | 1.007932  | 0.068050  |
| C                                                         | 4.899573  | -0.852937 | -1.103345 | C                                          | 3.668329  | 0.006596  | -1.132428 | C                                          | 3.376559  | 0.379570  | -0.831835 |
| C                                                         | 3.564023  | -0.443247 | -1.130225 | C                                          | 2.703955  | -0.860236 | -0.634688 | C                                          | 3.858714  | -0.432411 | -1.857672 |
| C                                                         | 2.593522  | -1.353061 | -0.729101 | C                                          | 2.991092  | -2.155090 | -0.217813 | C                                          | 5.236697  | -0.630613 | -1.965922 |
| C                                                         | 2.893163  | -2.644370 | -0.311915 | C                                          | 4.316821  | -2.587969 | -0.284451 | C                                          | 6.113522  | -0.016958 | -1.067297 |
| C                                                         | 4.233936  | -3.034048 | -0.287768 | C                                          | 5.314205  | -1.735239 | -0.765821 | H                                          | 6.288581  | 1.290614  | 0.640869  |
| C                                                         | 5.234848  | -2.142164 | -0.682338 | H                                          | 5.761515  | 0.214274  | -1.575866 | H                                          | 3.827898  | 1.650296  | 0.841131  |
| H                                                         | 5.675982  | -0.160072 | -1.413022 | H                                          | 3.380901  | 0.995643  | -1.470574 | H                                          | 3.167013  | -0.892754 | -2.552523 |
| H                                                         | 3.279786  | 0.554241  | -1.449512 | H                                          | 2.197534  | -2.803504 | 0.137162  | H                                          | 5.623483  | -1.261927 | -2.760365 |
| H                                                         | 2.100543  | -3.324281 | -0.018465 | H                                          | 4.565771  | -3.594778 | 0.036326  | H                                          | 7.184042  | -0.173080 | -1.160260 |
| H                                                         | 4.491985  | -4.037690 | 0.035683  | H                                          | 6.342677  | -2.079443 | -0.816022 | C                                          | -1.267766 | -0.485828 | 0.029469  |
| H                                                         | 6.274909  | -2.453047 | -0.664240 | C                                          | -1.541480 | -0.296306 | 1.161202  | C                                          | -2.548295 | -0.016259 | 0.055676  |
| C                                                         | -1.648230 | -0.088139 | 0.999460  | C                                          | -2.879944 | -0.177091 | 0.938083  | C                                          | -2.811487 | 1.369192  | -0.186679 |
| C                                                         | -2.922788 | 0.332800  | 0.780665  | C                                          | -3.370966 | 0.423441  | -0.263319 | C                                          | -1.670343 | 2.188107  | -0.450501 |
| C                                                         | -3.383326 | 0.617451  | -0.543914 | C                                          | -2.382639 | 0.941713  | -1.165473 | C                                          | -0.411420 | 1.657131  | -0.445339 |
| C                                                         | -2.416937 | 0.471688  | -1.596391 | C                                          | -1.057138 | 0.803875  | -0.897480 | N                                          | -0.200489 | 0.330502  | -0.215762 |
| C                                                         | -1.151124 | 0.061828  | -1.325830 | N                                          | -0.628263 | 0.181641  | 0.250876  | H                                          | -1.049626 | -1.531596 | 0.202641  |
| N                                                         | -0.747778 | -0.219383 | -0.038200 | H                                          | -1.139743 | -0.774283 | 2.040330  | H                                          | -3.338606 | -0.734757 | 0.253920  |
| H                                                         | -1.269206 | -0.319170 | 1.982125  | H                                          | -3.552068 | -0.570822 | 1.686047  | H                                          | -1.769367 | 3.245460  | -0.651387 |
| H                                                         | -3.577104 | 0.424538  | 1.634551  | H                                          | -2.665295 | 1.448783  | -2.077335 | H                                          | 0.465571  | 2.258780  | -0.624320 |
| H                                                         | -2.670925 | 0.676133  | -2.626825 | H                                          | -0.273806 | 1.207593  | -1.528850 | N                                          | -4.054874 | 1.872933  | -0.168744 |
| H                                                         | -0.407272 | -0.055850 | -2.099299 | N                                          | -4.679142 | 0.502619  | -0.529022 | C                                          | -4.283435 | 3.288143  | -0.474350 |
| N                                                         | -4.639177 | 1.001333  | -0.786119 | C                                          | -5.156776 | 1.139786  | -1.761582 | H                                          | -3.928128 | 3.536372  | -1.479877 |
| C                                                         | -5.088331 | 1.298655  | -2.151724 | H                                          | -4.803588 | 0.598254  | -2.644992 | H                                          | -5.351679 | 3.490247  | -0.426297 |
| H                                                         | -5.094371 | 0.394002  | -2.768560 | H                                          | -6.244740 | 1.132316  | -1.759459 | H                                          | -3.774396 | 3.932886  | 0.249602  |
| H                                                         | -6.099347 | 1.698032  | -2.106227 | H                                          | -4.816413 | 2.177753  | -1.819333 | C                                          | -5.213272 | 1.009879  | 0.086722  |
| H                                                         | -4.441219 | 2.046626  | -2.617181 | C                                          | -5.658088 | -0.097308 | 0.384964  | H                                          | -5.070222 | 0.426017  | 0.999425  |
| C                                                         | -5.618955 | 1.059083  | 0.305947  | H                                          | -5.644446 | 0.403440  | 1.358237  | H                                          | -6.092797 | 1.638173  | 0.218081  |
| H                                                         | -5.331693 | 1.810429  | 1.047972  | H                                          | -6.651361 | 0.007731  | -0.046599 | H                                          | -5.393662 | 0.322468  | -0.747520 |
| H                                                         | -6.588505 | 1.329255  | -0.107118 | H                                          | -5.444622 | -1.161589 | 0.525239  | C                                          | 1.551821  | 0.285436  | 2.162967  |
| H                                                         | -5.699542 | 0.082246  | 0.793352  | C                                          | 1.584567  | 2.760131  | -0.194649 | O                                          | 1.290946  | 1.454469  | 2.007825  |
| C                                                         | 2.641424  | 3.008799  | -0.018974 | O                                          | 1.436333  | 2.575563  | -1.406535 | C                                          | 1.961764  | -0.378109 | 3.444237  |
| O                                                         | 2.973073  | 3.078553  | -1.188499 | C                                          | 2.111666  | 4.078546  | 0.350448  | H                                          | 2.953768  | -0.825458 | 3.328320  |
| C                                                         | 3.274216  | 3.820105  | 1.088704  | H                                          | 1.373252  | 4.526747  | 1.023539  | H                                          | 1.978318  | 0.359471  | 4.246222  |
| H                                                         | 3.745717  | 3.153658  | 1.819523  | H                                          | 3.023098  | 3.907046  | 0.932399  | H                                          | 1.261498  | -1.182325 | 3.689741  |
| H                                                         | 4.027873  | 4.488889  | 0.673170  | H                                          | 2.324795  | 4.769463  | -0.466843 | N                                          | -4.668672 | -2.617317 | 0.521674  |
| H                                                         | 2.514029  | 4.405601  | 1.616231  | N                                          | -0.999714 | -3.156245 | 0.608908  | N                                          | -5.343196 | -2.442660 | -0.440729 |
| N                                                         | -2.127483 | -2.979265 | 1.307910  | N                                          | -2.097670 | -3.241437 | 0.165301  | N                                          | -6.017414 | -2.269915 | -1.399790 |
| N                                                         | -3.267261 | -2.793284 | 1.035860  | N                                          | -3.196321 | -3.318772 | -0.273127 | H                                          | 1.152189  | -3.612859 | 1.362524  |
| N                                                         | -4.404533 | -2.597798 | 0.762815  | H                                          | 1.257915  | 1.914895  | 2.395697  | O                                          | 0.594699  | -3.523434 | 0.573180  |
| H                                                         | 1.541237  | 2.134058  | 1.340286  | O                                          | 1.089916  | 1.322295  | 3.188539  | H                                          | 0.667631  | -4.373909 | 0.110409  |
| O                                                         | 1.245026  | 1.640353  | 2.935041  | H                                          | 1.889107  | 1.349037  | 3.744185  |                                            |           |           |           |
| H                                                         | 2.049292  | 1.687431  | 3.475895  |                                            |           |           |           |                                            |           |           |           |
|                                                           |           |           |           | <b>M<sub>1RB-5</sub> (1H<sub>2</sub>O)</b> |           |           |           | <b>M<sub>1RB-4</sub> (2H<sub>2</sub>O)</b> |           |           |           |
| <b>M<sub>1RB-TS<sub>3</sub></sub></b> (1H <sub>2</sub> O) |           |           |           | C                                          | 1.171500  | -0.289285 | -0.199425 | C                                          | -0.662081 | 0.705172  | 0.271838  |
| C                                                         | 0.762702  | -0.061159 | 0.464130  | O                                          | 1.513797  | -0.646470 | 1.147107  | O                                          | -1.270583 | -2.130998 | 0.275363  |
| O                                                         | 1.314547  | 1.874753  | 0.730545  | O                                          | 1.181365  | -1.437721 | -0.907934 | H                                          | -0.947380 | 0.041082  | 3.070368  |
| O                                                         | 1.165412  | -0.484217 | 1.593617  | H                                          | 1.035150  | -2.236125 | -0.320239 | O                                          | -1.333827 | 0.889247  | -0.860678 |

|                                                         |           |           |           |                                            |           |           |           |   |           |           |           |
|---------------------------------------------------------|-----------|-----------|-----------|--------------------------------------------|-----------|-----------|-----------|---|-----------|-----------|-----------|
| C                                                       | -4.970947 | 0.691599  | -1.284099 | H                                          | 1.002978  | 0.326183  | 2.614238  | O | -1.410876 | -1.283140 | 0.006290  |
| C                                                       | -3.623068 | 0.325328  | -1.261594 | O                                          | 1.349844  | -0.458871 | -0.831215 | O | -0.940527 | 0.309726  | 1.490200  |
| C                                                       | -2.700081 | 1.252990  | -0.795274 | C                                          | 4.942454  | -1.106643 | -1.266404 | H | -1.784774 | -0.106576 | 1.883256  |
| C                                                       | -3.057964 | 2.525187  | -0.363952 | C                                          | 3.712281  | -0.443934 | -1.278341 | O | -1.243592 | 0.937028  | -0.718417 |
| C                                                       | -4.410444 | 2.871812  | -0.390440 | C                                          | 2.603251  | -1.085872 | -0.735676 | C | -4.777140 | 1.200504  | -1.683088 |
| C                                                       | -5.364988 | 1.958869  | -0.847327 | C                                          | 2.681409  | -2.369563 | -0.199052 | C | -3.437266 | 0.807812  | -1.672754 |
| H                                                       | -5.710602 | -0.016446 | -1.645275 | C                                          | 3.917385  | -3.017846 | -0.192056 | C | -2.599737 | 1.280970  | -0.663136 |
| H                                                       | -3.281929 | -0.647505 | -1.600210 | C                                          | 5.047938  | -2.388468 | -0.721751 | C | -3.067904 | 2.148297  | 0.324935  |
| H                                                       | -2.301730 | 3.223710  | -0.022567 | H                                          | 5.816187  | -0.619115 | -1.688548 | C | -4.412619 | 2.526743  | 0.306654  |
| H                                                       | -4.714014 | 3.859368  | -0.056973 | H                                          | 3.602582  | 0.542875  | -1.713326 | C | -5.267929 | 2.054577  | -0.692388 |
| H                                                       | -6.414272 | 2.237154  | -0.867092 | H                                          | 1.788629  | -2.844962 | 0.193195  | H | -5.434628 | 0.838835  | -2.468033 |
| C                                                       | 1.618365  | 0.440488  | 0.974333  | H                                          | 3.993692  | -4.018365 | 0.223131  | H | -3.036170 | 0.153258  | -2.439188 |
| C                                                       | 2.919850  | 0.109953  | 0.753888  | H                                          | 6.006109  | -2.899353 | -0.716230 | H | -2.389006 | 2.520247  | 1.083060  |
| C                                                       | 3.339554  | -0.399844 | -0.516003 | C                                          | -1.518108 | -0.151270 | 0.966268  | H | -4.786765 | 3.200864  | 1.071413  |
| C                                                       | 2.306477  | -0.607704 | -1.490904 | C                                          | -2.864259 | -0.085131 | 0.746962  | H | -6.310430 | 2.357937  | -0.703390 |
| C                                                       | 1.019349  | -0.265583 | -1.221287 | C                                          | -3.376624 | 0.429233  | -0.482776 | C | 1.457140  | -0.770482 | 0.848197  |
| N                                                       | 0.665582  | 0.275380  | -0.006332 | C                                          | -2.404692 | 0.889724  | -1.427308 | C | 2.798084  | -0.949063 | 0.671874  |
| H                                                       | 1.265466  | 0.838029  | 1.912296  | C                                          | -1.071643 | 0.801578  | -1.152124 | C | 3.455463  | -0.429408 | -0.487262 |
| H                                                       | 3.622198  | 0.255842  | 1.560984  | N                                          | -0.624446 | 0.290003  | 0.033528  | C | 2.621481  | 0.273030  | -1.410919 |
| H                                                       | 2.523048  | -1.035866 | -2.459450 | H                                          | -1.101469 | -0.569823 | 1.869413  | C | 1.280708  | 0.403313  | -1.187092 |
| H                                                       | 0.214775  | -0.430356 | -1.922495 | H                                          | -3.520685 | -0.453006 | 1.521516  | N | 0.692160  | -0.111587 | -0.070363 |
| N                                                       | 4.620500  | -0.677135 | -0.774996 | H                                          | -2.700022 | 1.303457  | -2.381378 | H | 0.939699  | -1.134478 | 1.724551  |
| C                                                       | 5.021244  | -1.244494 | -2.068093 | H                                          | -0.300997 | 1.142589  | -1.834294 | H | 3.341311  | -1.472112 | 1.445699  |
| H                                                       | 4.819236  | -0.542559 | -2.883501 | N                                          | -4.692836 | 0.473473  | -0.737996 | H | 3.025285  | 0.725218  | -2.305292 |
| H                                                       | 6.088918  | -1.452935 | -2.042976 | C                                          | -5.190488 | 1.015747  | -2.005540 | H | 0.631468  | 0.917844  | -1.877160 |
| H                                                       | 4.490591  | -2.180918 | -2.262895 | H                                          | -4.872751 | 0.398322  | -2.852845 | N | 4.772196  | -0.590748 | -0.693341 |
| C                                                       | 5.657813  | -0.393119 | 0.224303  | H                                          | -6.278291 | 1.031927  | -1.975708 | C | 5.432127  | 0.073489  | -1.820106 |
| H                                                       | 5.561839  | -1.056555 | 1.090064  | H                                          | -4.834258 | 2.038689  | -2.158815 | H | 5.436016  | 1.161284  | -1.683371 |
| H                                                       | 6.634131  | -0.548135 | -0.230300 | C                                          | -5.650393 | -0.089141 | 0.219572  | H | 6.460762  | -0.278026 | -1.879945 |
| H                                                       | 5.588018  | 0.646350  | 0.556669  | H                                          | -5.639220 | 0.467631  | 1.162496  | H | 4.933999  | -0.169832 | -2.761762 |
| C                                                       | -1.671610 | -2.972370 | -0.682968 | H                                          | -6.650028 | -0.028207 | -0.206558 | C | 5.617936  | -1.185653 | 0.344718  |
| O                                                       | -1.737163 | -2.595659 | -1.842277 | H                                          | -5.417537 | -1.139612 | 0.422180  | H | 5.247402  | -2.173062 | 0.631643  |
| C                                                       | -2.011115 | -4.377775 | -0.239225 | C                                          | 1.771651  | 2.511318  | -0.815282 | H | 6.625913  | -1.303416 | -0.049895 |
| H                                                       | -1.114098 | -4.872459 | 0.149146  | O                                          | 1.567276  | 2.185195  | -1.979241 | H | 5.656625  | -0.541045 | 1.230596  |
| H                                                       | -2.750253 | -4.358227 | 0.567610  | C                                          | 2.541920  | 3.766656  | -0.449867 | C | -1.367286 | -1.957386 | -1.192203 |
| H                                                       | -2.400254 | -4.948266 | -1.082436 | H                                          | 1.901220  | 4.458049  | 0.107538  | O | -0.725058 | -1.588228 | -2.147360 |
| N                                                       | 1.576733  | 3.366956  | 0.810016  | H                                          | 3.392789  | 3.515973  | 0.190931  | C | -2.239306 | -3.177776 | -1.126981 |
| N                                                       | 2.725878  | 3.327614  | 0.514593  | H                                          | 2.894254  | 4.260644  | -1.356168 | H | -2.245816 | -3.612247 | -0.125754 |
| N                                                       | 3.873298  | 3.279374  | 0.221057  | N                                          | -1.287502 | -3.382709 | 1.057164  | H | -3.266534 | -2.879128 | -1.367478 |
| H                                                       | -1.198977 | -2.106056 | 3.238090  | N                                          | -2.386359 | -3.419995 | 0.610166  | H | -1.904985 | -3.903349 | -1.869434 |
| O                                                       | -0.926958 | -0.531423 | 3.859223  | N                                          | -3.485572 | -3.460469 | 0.165942  | N | 2.340619  | 2.659875  | 1.758254  |
| H                                                       | -1.679736 | -0.238035 | 4.395554  | H                                          | 0.928353  | 1.885059  | 3.281408  | N | 3.488782  | 2.491029  | 1.514460  |
| O                                                       | -1.315187 | -2.964339 | 2.752989  | O                                          | 0.896007  | 0.856149  | 3.557172  | N | 4.640196  | 2.326318  | 1.272580  |
| H                                                       | -1.284315 | -2.536625 | 1.198712  | H                                          | 1.650123  | 0.645224  | 4.138595  | H | -2.926709 | -1.693658 | 2.557692  |
| H                                                       | -0.527640 | -3.484910 | 2.973191  | O                                          | 0.992838  | 3.117944  | 2.586644  | O | -3.027098 | -0.710321 | 2.599124  |
| <b>M<sub>1RB-TS<sub>3</sub></sub> (2H<sub>2</sub>O)</b> |           |           |           | H                                          | 1.117406  | 2.774534  | 1.660351  | H | -3.811157 | -0.511669 | 2.064359  |
| C                                                       | 0.817898  | 0.105810  | 0.284758  | H                                          | 0.140164  | 3.584274  | 2.594218  | O | -2.604130 | -3.393058 | 2.418542  |
| O                                                       | 1.353417  | 1.835470  | 0.251814  | <b>M<sub>1RB-5</sub> (2H<sub>2</sub>O)</b> |           |           |           | H | -1.647995 | -3.521332 | 2.523619  |
| O                                                       | 1.172856  | -0.285675 | 1.421667  | C                                          | -0.773922 | -0.006650 | 0.195024  | H | -2.999910 | -3.929723 | 3.123828  |

|                                                         |           |           |           |                                       |           |           |           |                                       |           |           |           |
|---------------------------------------------------------|-----------|-----------|-----------|---------------------------------------|-----------|-----------|-----------|---------------------------------------|-----------|-----------|-----------|
| <b>M<sub>1RB</sub>-TS<sub>3</sub> (3H<sub>2</sub>O)</b> |           |           |           | H                                     | 2.272724  | -4.099854 | -0.368027 | N                                     | -3.263639 | 1.920453  | -0.916166 |
| C                                                       | 0.883727  | -0.346156 | -0.064954 | H                                     | 1.221796  | -5.218103 | -0.959860 | <b>M<sub>1RB</sub>-6</b>              |           |           |           |
| O                                                       | 1.290999  | -1.038644 | 1.268294  | O                                     | 2.741483  | -3.371395 | 0.803170  | C                                     | 3.838565  | -2.454403 | -1.392847 |
| O                                                       | 1.426897  | -0.991732 | -0.998735 | H                                     | 2.251724  | -2.524399 | 0.916516  | C                                     | 2.968738  | -1.487788 | -0.884356 |
| H                                                       | 1.149499  | -2.032714 | -2.087183 | H                                     | 3.678132  | -3.127366 | 0.724870  | C                                     | 3.459740  | -0.579050 | 0.049221  |
| O                                                       | 1.179145  | 1.019015  | 0.078693  | <b>M<sub>1RB</sub>-TS<sub>4</sub></b> |           |           |           | C                                     | 4.783070  | -0.597118 | 0.477227  |
| C                                                       | 4.818031  | 1.436730  | -0.474235 | C                                     | 3.578043  | -2.683256 | 0.483289  | C                                     | 5.641960  | -1.568567 | -0.042967 |
| C                                                       | 3.617188  | 0.808548  | -0.135063 | C                                     | 2.665568  | -1.631529 | 0.612673  | C                                     | 5.172074  | -2.496768 | -0.975270 |
| C                                                       | 2.418682  | 1.511507  | -0.289137 | C                                     | 2.878521  | -0.452257 | -0.110666 | H                                     | 3.471953  | -3.173585 | -2.119358 |
| C                                                       | 2.417643  | 2.825203  | -0.766460 | C                                     | 3.989130  | -0.338126 | -0.956705 | H                                     | 1.926924  | -1.433591 | -1.187224 |
| C                                                       | 3.625939  | 3.441514  | -1.091335 | C                                     | 4.886770  | -1.396790 | -1.077175 | H                                     | 5.128170  | 0.135892  | 1.199293  |
| C                                                       | 4.831800  | 2.749596  | -0.950277 | C                                     | 4.686708  | -2.578125 | -0.356923 | H                                     | 6.677776  | -1.596049 | 0.281707  |
| H                                                       | 5.750068  | 0.890754  | -0.357704 | H                                     | 3.409234  | -3.594596 | 1.050193  | H                                     | 5.843473  | -3.249553 | -1.377339 |
| H                                                       | 3.614525  | -0.208460 | 0.234287  | H                                     | 1.819671  | -1.736175 | 1.278390  | C                                     | 1.697262  | 0.246481  | 1.457287  |
| H                                                       | 1.471035  | 3.346803  | -0.869139 | H                                     | 4.132732  | 0.584795  | -1.509829 | O                                     | 1.737031  | -0.992097 | 1.965615  |
| H                                                       | 3.621145  | 4.463776  | -1.458505 | H                                     | 5.744385  | -1.295280 | -1.736120 | O                                     | 2.626861  | 0.459365  | 0.507982  |
| H                                                       | 5.771725  | 3.228948  | -1.206857 | H                                     | 5.386700  | -3.403025 | -0.448337 | C                                     | 0.358209  | 3.614771  | -0.514210 |
| C                                                       | -1.434977 | 0.694753  | 0.172731  | C                                     | 1.047546  | 0.898732  | 0.855347  | O                                     | 0.182653  | 3.013611  | -1.554144 |
| C                                                       | -2.801600 | 0.616601  | 0.111772  | O                                     | 1.473867  | 0.536549  | 2.129455  | O                                     | 0.945785  | 1.126707  | 1.810780  |
| C                                                       | -3.447075 | -0.617302 | -0.194634 | O                                     | 2.047762  | 0.654637  | -0.119892 | C                                     | 1.678562  | 4.029897  | 0.058202  |
| C                                                       | -2.587339 | -1.741004 | -0.393012 | C                                     | -0.072266 | 2.874466  | -0.469955 | H                                     | 2.467884  | 3.854309  | -0.672676 |
| C                                                       | -1.230344 | -1.589353 | -0.327638 | O                                     | -0.097643 | 2.197610  | -1.490515 | H                                     | 1.656092  | 5.083243  | 0.351434  |
| N                                                       | -0.648445 | -0.390380 | -0.060455 | O                                     | 0.699503  | 2.182555  | 0.846888  | H                                     | 1.868423  | 3.431616  | 0.955265  |
| H                                                       | -0.933718 | 1.624882  | 0.392731  | C                                     | 0.512416  | 4.272029  | -0.400107 | C                                     | -1.116239 | -2.341712 | -0.164853 |
| H                                                       | -3.361062 | 1.527478  | 0.280628  | H                                     | 1.560662  | 4.230875  | -0.710032 | C                                     | -2.456718 | -2.580592 | 0.099025  |
| H                                                       | -2.981414 | -2.725552 | -0.602429 | H                                     | -0.036401 | 4.914005  | -1.095499 | C                                     | -3.406374 | -1.549216 | -0.121426 |
| H                                                       | -0.557822 | -2.420637 | -0.483633 | H                                     | 0.446746  | 4.692347  | 0.604357  | C                                     | -2.882498 | -0.327808 | -0.618809 |
| N                                                       | -4.785244 | -0.715314 | -0.292359 | C                                     | -1.085646 | -0.196460 | 1.510534  | C                                     | -1.519540 | -0.208709 | -0.845240 |
| C                                                       | -5.418436 | -1.998496 | -0.602450 | C                                     | -2.218329 | -0.930323 | 1.292066  | N                                     | -0.615816 | -1.183444 | -0.632307 |
| H                                                       | -5.285422 | -2.719277 | 0.212601  | C                                     | -2.437709 | -1.559529 | 0.028042  | H                                     | -0.394563 | -3.138256 | 0.010290  |
| H                                                       | -6.484798 | -1.837026 | -0.751056 | C                                     | -1.428311 | -1.350979 | -0.957941 | H                                     | -2.755378 | -3.553855 | 0.467777  |
| H                                                       | -5.006173 | -2.426099 | -1.521387 | C                                     | -0.325041 | -0.590656 | -0.675539 | H                                     | -3.525346 | 0.518882  | -0.823752 |
| C                                                       | -5.632486 | 0.448748  | -0.020167 | N                                     | -0.135140 | -0.035885 | 0.550039  | H                                     | -1.128221 | 0.735043  | -1.221129 |
| H                                                       | -5.376257 | 1.285488  | -0.677781 | H                                     | -0.886620 | 0.283831  | 2.458223  | N                                     | -4.737916 | -1.718930 | 0.128979  |
| H                                                       | -6.671808 | 0.176402  | -0.195324 | H                                     | -2.930541 | -1.020632 | 2.100261  | C                                     | -5.681081 | -0.648150 | -0.171968 |
| H                                                       | -5.529489 | 0.779231  | 1.019452  | H                                     | -1.511353 | -1.774892 | -1.948659 | H                                     | -5.684734 | -0.394702 | -1.240122 |
| C                                                       | 0.902890  | -0.608778 | 2.498941  | H                                     | 0.438633  | -0.394703 | -1.411203 | H                                     | -6.684437 | -0.971072 | 0.104212  |
| O                                                       | 0.132449  | 0.308130  | 2.688294  | N                                     | -3.534482 | -2.298080 | -0.218145 | H                                     | -5.449896 | 0.262400  | 0.393932  |
| C                                                       | 1.546484  | -1.433993 | 3.585196  | C                                     | -3.735204 | -2.909514 | -1.534006 | C                                     | -5.237571 | -3.004971 | 0.600624  |
| H                                                       | 1.229461  | -2.478320 | 3.501272  | H                                     | -2.937072 | -3.623367 | -1.763994 | H                                     | -4.751294 | -3.303267 | 1.536875  |
| H                                                       | 2.635958  | -1.409383 | 3.487816  | H                                     | -4.684862 | -3.441035 | -1.534415 | H                                     | -6.307909 | -2.923144 | 0.788915  |
| H                                                       | 1.253979  | -1.042988 | 4.559958  | H                                     | -3.763984 | -2.148483 | -2.321104 | H                                     | -5.078981 | -3.803503 | -0.136300 |
| N                                                       | -1.268397 | 4.214320  | 0.024051  | C                                     | -4.551110 | -2.486465 | 0.819189  | H                                     | 1.018091  | -1.054153 | 2.619905  |
| N                                                       | -2.444378 | 4.103791  | -0.091177 | H                                     | -4.999967 | -1.531183 | 1.112043  | N                                     | -0.726715 | 4.012205  | 0.345106  |
| N                                                       | -3.621575 | 4.004271  | -0.204561 | H                                     | -5.336091 | -3.131805 | 0.428986  | N                                     | -1.856880 | 3.676806  | -0.054150 |
| H                                                       | 1.498843  | -3.820996 | -1.944226 | H                                     | -4.123724 | -2.962466 | 1.707906  | N                                     | -2.923477 | 3.418345  | -0.334971 |
| O                                                       | 1.010759  | -2.861294 | -2.657758 | H                                     | 1.654036  | 1.376555  | 2.584388  | <b>M<sub>1RB</sub>-TS<sub>5</sub></b> |           |           |           |
| H                                                       | 1.493159  | -2.736052 | -3.492171 | N                                     | -1.579534 | 3.048758  | 0.307106  | C                                     | -5.558507 | -0.564888 | 2.109891  |
| O                                                       | 1.916982  | -4.589338 | -1.224332 | N                                     | -2.446720 | 2.472913  | -0.315088 |                                       |           |           |           |

|                          |           |           |           |                          |           |           |           |    |           |           |           |
|--------------------------|-----------|-----------|-----------|--------------------------|-----------|-----------|-----------|----|-----------|-----------|-----------|
| C                        | -4.386796 | -0.221442 | 1.434594  | C                        | 0.485501  | 1.340605  | -0.027664 | H  | -1.264930 | -6.330083 | -2.057813 |
| C                        | -4.445350 | 0.065758  | 0.069519  | C                        | -0.011136 | 1.865980  | -1.226930 | H  | -0.861192 | -3.871441 | -1.967078 |
| C                        | -5.655772 | 0.022622  | -0.620777 | C                        | -0.711976 | 3.073479  | -1.225209 | H  | 0.582449  | -4.248131 | 2.060233  |
| C                        | -6.824510 | -0.317465 | 0.065505  | C                        | -0.931625 | 3.761363  | -0.028972 | H  | 0.190625  | -6.712716 | 1.976342  |
| C                        | -6.779329 | -0.613912 | 1.429527  | H                        | -0.593072 | 3.762301  | 2.102381  | H  | -0.737786 | -7.750224 | -0.085354 |
| H                        | -5.517446 | -0.790145 | 3.171796  | H                        | 0.659936  | 1.622383  | 2.103036  | C  | -0.853509 | -1.662453 | 0.179616  |
| H                        | -3.435093 | -0.172769 | 1.953927  | H                        | 0.166841  | 1.322753  | -2.150207 | O  | -2.027531 | -2.025889 | 0.234629  |
| H                        | -5.673561 | 0.258606  | -1.680203 | H                        | -1.088834 | 3.473977  | -2.162393 | O  | 0.173134  | -2.573197 | 0.103191  |
| H                        | -7.769246 | -0.350185 | -0.469571 | H                        | -1.477303 | 4.700266  | -0.027656 | C  | 0.611550  | 2.282031  | 1.772706  |
| H                        | -7.688811 | -0.877629 | 1.961157  | C                        | 1.120421  | -0.864506 | 0.852010  | O  | 1.008005  | 1.929561  | 0.649091  |
| C                        | -2.272363 | -0.372592 | -0.874645 | O                        | 0.049472  | -0.907427 | 1.510140  | O  | -0.430288 | -0.447386 | 0.192499  |
| O                        | -2.481188 | -1.591960 | -0.531329 | O                        | 1.253712  | 0.208290  | -0.107626 | C  | 0.412714  | 1.361880  | 2.929620  |
| O                        | -3.315022 | 0.503888  | -0.611462 | C                        | 6.126719  | -0.746982 | -0.245937 | H  | -0.346576 | 0.622819  | 2.653341  |
| C                        | 0.878017  | 3.116779  | -0.803597 | O                        | 6.325614  | -1.612208 | 0.580441  | H  | 1.348228  | 0.825134  | 3.120019  |
| O                        | 1.982640  | 2.884254  | -1.253698 | O                        | 2.095502  | -1.614612 | 0.865860  | H  | 0.102135  | 1.899641  | 3.824685  |
| O                        | -1.282443 | 0.115936  | -1.414443 | C                        | 4.795453  | -0.235518 | -0.702894 | C  | -5.391545 | -0.802533 | 0.085252  |
| C                        | -0.369003 | 3.344333  | -1.599475 | H                        | 3.986614  | -0.743891 | -0.173354 | C  | -6.511591 | -0.042732 | -0.126639 |
| H                        | -0.106320 | 3.598030  | -2.627229 | H                        | 4.739615  | 0.844600  | -0.529079 | C  | -6.386447 | 1.328537  | -0.511485 |
| H                        | -0.945729 | 2.408836  | -1.593017 | H                        | 4.697645  | -0.390930 | -1.783264 | C  | -5.055622 | 1.833237  | -0.649131 |
| H                        | -0.982730 | 4.130131  | -1.152257 | C                        | -3.215496 | 0.387861  | 0.725287  | C  | -3.982492 | 1.013403  | -0.418444 |
| C                        | 2.575570  | -2.997039 | -0.015682 | C                        | -4.533342 | 0.368401  | 0.346769  | N  | -4.149992 | -0.281170 | -0.058296 |
| C                        | 3.829811  | -2.514265 | 0.293686  | C                        | -5.117758 | -0.835679 | -0.151943 | H  | -5.442668 | -1.845893 | 0.372608  |
| C                        | 4.105549  | -1.124520 | 0.153367  | C                        | -4.259608 | -1.975106 | -0.226627 | H  | -7.479832 | -0.506844 | -0.001054 |
| C                        | 3.029156  | -0.314947 | -0.306566 | C                        | -2.952234 | -1.876609 | 0.174620  | H  | -4.868430 | 2.859555  | -0.932628 |
| C                        | 1.809998  | -0.893657 | -0.590887 | N                        | -2.439044 | -0.715914 | 0.641285  | H  | -2.958410 | 1.354323  | -0.511443 |
| N                        | 1.569605  | -2.213990 | -0.452928 | H                        | -2.735443 | 1.281762  | 1.104788  | N  | -7.465419 | 2.102681  | -0.733141 |
| H                        | 2.349994  | -4.054862 | 0.085772  | H                        | -5.107014 | 1.280711  | 0.431044  | C  | -7.304525 | 3.497487  | -1.150763 |
| H                        | 4.584589  | -3.206636 | 0.641823  | H                        | -4.618032 | -2.927856 | -0.590229 | H  | -6.733774 | 3.565343  | -2.082898 |
| H                        | 3.140679  | 0.752110  | -0.444706 | H                        | -2.271197 | -2.718634 | 0.138756  | H  | -8.288570 | 3.931905  | -1.318637 |
| H                        | 0.969948  | -0.300376 | -0.942360 | N                        | -6.410685 | -0.893909 | -0.528912 | H  | -6.792584 | 4.085496  | -0.380783 |
| N                        | 5.324600  | -0.602222 | 0.440245  | C                        | -6.971732 | -2.136589 | -1.061957 | C  | -8.814784 | 1.560717  | -0.555706 |
| C                        | 5.561458  | 0.833104  | 0.305121  | H                        | -6.945609 | -2.936926 | -0.313891 | H  | -8.959114 | 1.190190  | 0.464686  |
| H                        | 4.871702  | 1.412807  | 0.929533  | H                        | -8.008478 | -1.961940 | -1.344321 | H  | -9.539068 | 2.352122  | -0.739710 |
| H                        | 6.578511  | 1.055158  | 0.625157  | H                        | -6.423352 | -2.468086 | -1.950044 | H  | -9.008630 | 0.742046  | -1.257614 |
| H                        | 5.446933  | 1.164415  | -0.734082 | C                        | -7.270054 | 0.285413  | -0.412029 | H  | -3.319146 | -0.886275 | 0.092012  |
| C                        | 6.411063  | -1.470058 | 0.887625  | H                        | -6.920933 | 1.098209  | -1.058729 | N  | 0.309500  | 3.612053  | 2.039845  |
| H                        | 6.626895  | -2.251607 | 0.150036  | H                        | -8.280869 | 0.015002  | -0.712123 | N  | 0.464952  | 4.405584  | 1.071894  |
| H                        | 7.311021  | -0.871204 | 1.021134  | H                        | -7.303066 | 0.648147  | 0.620644  | N  | 0.558470  | 5.221830  | 0.302031  |
| H                        | 6.174221  | -1.953035 | 1.843326  | H                        | -1.424554 | -0.691151 | 0.950582  | Cu | 1.426108  | -0.026504 | 0.056365  |
| H                        | -1.554345 | -2.328758 | -0.805386 | N                        | 7.205700  | -0.068162 | -0.925932 | C  | 3.711277  | 1.076137  | -1.311431 |
| H                        | 0.358378  | -2.704035 | -0.771909 | N                        | 8.344495  | -0.440420 | -0.589655 | C  | 5.030476  | 1.379554  | -1.554269 |
| O                        | -0.684359 | -3.114859 | -1.044958 | N                        | 9.415938  | -0.715628 | -0.344530 | C  | 6.044444  | 0.908022  | -0.668918 |
| H                        | -0.688144 | -3.273215 | -2.001931 |                          |           |           |           | C  | 5.596863  | 0.135706  | 0.443365  |
| N                        | 0.611580  | 3.163791  | 0.610235  | <b>M<sub>IRB</sub>-8</b> |           |           |           | C  | 4.255224  | -0.118998 | 0.606933  |
| N                        | 1.597167  | 2.932226  | 1.335257  | C                        | -0.862317 | -5.880883 | -1.154675 | N  | 3.310612  | 0.325375  | -0.257077 |
| N                        | 2.430990  | 2.735826  | 2.076172  | C                        | -0.640938 | -4.502904 | -1.112217 | H  | 2.930026  | 1.430273  | -1.976504 |
|                          |           |           |           | C                        | -0.127115 | -3.942132 | 0.055150  | H  | 5.272401  | 1.975458  | -2.423843 |
| <b>M<sub>IRB</sub>-7</b> |           |           |           | C                        | 0.177409  | -4.718518 | 1.169604  | H  | 6.292139  | -0.263388 | 1.169435  |
| C                        | -0.435932 | 3.231728  | 1.167014  | C                        | -0.044251 | -6.097074 | 1.113006  | H  | 3.901930  | -0.705723 | 1.448871  |
| C                        | 0.272443  | 2.028691  | 1.175753  | C                        | -0.565522 | -6.678757 | -0.045367 |    |           |           |           |

|                            |           |           |           |                          |           |           |           |                            |           |           |           |
|----------------------------|-----------|-----------|-----------|--------------------------|-----------|-----------|-----------|----------------------------|-----------|-----------|-----------|
| N                          | 7.351840  | 1.181864  | -0.867272 | H                        | 9.338513  | 1.099729  | -1.207180 | C                          | -6.278759 | 1.147295  | -0.304931 |
| C                          | 8.358979  | 0.697315  | 0.077060  | H                        | 3.492045  | 1.046237  | 0.215331  | C                          | -5.760977 | 1.015118  | 1.021807  |
| H                          | 8.367989  | -0.397772 | 0.118891  | N                        | -0.285633 | -4.406799 | 1.393434  | C                          | -4.613966 | 0.298615  | 1.244356  |
| H                          | 9.340495  | 1.037291  | -0.249095 | N                        | -1.030227 | -5.278726 | -0.131617 | N                          | -3.945955 | -0.293883 | 0.225960  |
| H                          | 8.177329  | 1.084346  | 1.085946  | N                        | -1.295378 | -6.137380 | -0.773421 | H                          | -3.811225 | -0.699976 | -1.804173 |
| C                          | 7.775743  | 1.989024  | -2.011870 | Cu                       | -1.206127 | -0.462747 | 0.169058  | H                          | -5.859558 | 0.550197  | -2.376144 |
| H                          | 7.370371  | 3.005946  | -1.955388 | C                        | -3.775087 | -1.282529 | -0.892436 | H                          | -6.258684 | 1.465634  | 1.869063  |
| H                          | 8.862854  | 2.050595  | -2.015560 | C                        | -5.136129 | -1.267595 | -1.092240 | H                          | -4.191805 | 0.169914  | 2.233841  |
| H                          | 7.454178  | 1.535981  | -2.955830 | C                        | -5.943841 | -0.296070 | -0.431627 | N                          | -7.402882 | 1.841223  | -0.562099 |
| <b>M<sub>1RB-TS6</sub></b> |           |           |           | C                        | -5.253378 | 0.618034  | 0.416781  | C                          | -8.129204 | 2.505451  | 0.522579  |
| C                          | -1.184363 | 5.078679  | -1.111377 | C                        | -3.887621 | 0.529629  | 0.555332  | H                          | -7.495442 | 3.242382  | 1.027445  |
| C                          | -0.927216 | 3.706042  | -1.157981 | N                        | -3.137300 | -0.396409 | -0.090308 | H                          | -8.991874 | 3.021388  | 0.104547  |
| C                          | -0.620549 | 3.047788  | 0.028165  | H                        | -3.153779 | -2.023351 | -1.383911 | H                          | -8.484574 | 1.780148  | 1.262633  |
| C                          | -0.566131 | 3.706432  | 1.253658  | H                        | -5.568970 | -2.003955 | -1.755939 | C                          | -7.910017 | 1.947217  | -1.932129 |
| C                          | -0.819535 | 5.079044  | 1.283534  | H                        | -5.778171 | 1.391893  | 0.960526  | H                          | -8.131267 | 0.958403  | -2.347992 |
| C                          | -1.129181 | 5.764507  | 0.104886  | H                        | -3.354266 | 1.223395  | 1.197725  | H                          | -8.829283 | 2.530220  | -1.923894 |
| H                          | -1.425672 | 5.609187  | -2.027531 | N                        | -7.283719 | -0.246631 | -0.596777 | H                          | -7.186287 | 2.448899  | -2.583895 |
| H                          | -0.962729 | 3.154119  | -2.091866 | C                        | -8.078261 | 0.758671  | 0.108918  | H                          | -3.081020 | -0.834590 | 0.417059  |
| H                          | -0.331764 | 3.156094  | 2.159544  | H                        | -7.784382 | 1.773835  | -0.181449 | N                          | -1.144734 | 3.157460  | 0.734529  |
| H                          | -0.778723 | 5.609818  | 2.229915  | H                        | -9.128284 | 0.619754  | -0.143554 | Cu                         | 1.625629  | 0.239396  | 0.315631  |
| H                          | -1.329849 | 6.831230  | 0.135307  | H                        | -7.969346 | 0.661008  | 1.194948  | C                          | 3.902063  | 1.445599  | -1.039910 |
| C                          | 0.850150  | 1.091883  | 0.202039  | C                        | -7.956344 | -1.206307 | -1.472428 | C                          | 5.218047  | 1.802205  | -1.220081 |
| O                          | 1.854541  | 1.782927  | 0.254306  | H                        | -7.813779 | -2.234433 | -1.120414 | C                          | 6.210227  | 1.362172  | -0.294338 |
| O                          | -0.417119 | 1.655270  | -0.019232 | H                        | -9.023650 | -0.990166 | -1.479016 | C                          | 5.744943  | 0.563409  | 0.791532  |
| C                          | -0.529207 | -3.163952 | 1.193372  | H                        | -7.584135 | -1.134592 | -2.500608 | C                          | 4.408626  | 0.256483  | 0.892842  |
| O                          | -1.096209 | -2.487434 | 0.307588  | <b>M<sub>1RB-9</sub></b> |           |           |           | N                          | 3.485767  | 0.669781  | -0.010406 |
| O                          | 0.708543  | -0.178186 | 0.304642  | C                        | -0.035128 | -5.503859 | -1.518214 | H                          | 3.139130  | 1.778078  | -1.736006 |
| C                          | 0.125136  | -2.613066 | 2.499061  | C                        | 0.172640  | -4.147386 | -1.256637 | H                          | 5.474260  | 2.417469  | -2.071850 |
| H                          | 0.896795  | -1.920225 | 2.154584  | C                        | 0.204360  | -3.716180 | 0.066636  | H                          | 6.421608  | 0.185463  | 1.545670  |
| H                          | -0.689394 | -2.121118 | 3.037771  | C                        | 0.038874  | -4.597094 | 1.131777  | H                          | 4.040300  | -0.349185 | 1.715079  |
| H                          | 0.579320  | -3.368214 | 3.145442  | C                        | -0.169184 | -5.950925 | 0.857379  | N                          | 7.513321  | 1.689722  | -0.430601 |
| C                          | 5.496597  | 1.560852  | 0.193618  | C                        | -0.206612 | -6.405350 | -0.464149 | C                          | 8.490098  | 1.267746  | 0.574192  |
| C                          | 6.785010  | 1.146364  | -0.016135 | H                        | -0.060949 | -5.853148 | -2.546212 | H                          | 8.518962  | 0.176414  | 0.662169  |
| C                          | 7.053925  | -0.213210 | -0.369290 | H                        | 0.311929  | -3.432111 | -2.061444 | H                          | 9.477403  | 1.613619  | 0.272560  |
| C                          | 5.922381  | -1.082554 | -0.465848 | H                        | 0.073898  | -4.226192 | 2.151366  | H                          | 8.258874  | 1.691849  | 1.558214  |
| C                          | 4.661394  | -0.597725 | -0.242707 | H                        | -0.300185 | -6.649640 | 1.678396  | C                          | 7.952767  | 2.541825  | -1.535945 |
| N                          | 4.455161  | 0.701833  | 0.079532  | H                        | -0.366495 | -7.459219 | -0.671744 | H                          | 7.526286  | 3.549042  | -1.459692 |
| H                          | 5.249434  | 2.582594  | 0.455387  | C                        | -0.554618 | -1.498089 | 0.524822  | H                          | 9.038243  | 2.622702  | -1.507746 |
| H                          | 7.580549  | 1.870923  | 0.087117  | O                        | -1.717954 | -1.894355 | 0.570978  | H                          | 7.665343  | 2.112111  | -2.501046 |
| H                          | 6.033361  | -2.126853 | -0.721423 | O                        | 0.488154  | -2.365869 | 0.325707  | <b>M<sub>1RB-TS7</sub></b> |           |           |           |
| H                          | 3.777182  | -1.219261 | -0.313636 | C                        | -0.102105 | 2.713070  | 0.454764  | C                          | 0.674466  | -3.310183 | 1.931455  |
| N                          | 8.305111  | -0.650778 | -0.601538 | O                        | 0.990497  | 2.277932  | 0.157039  | C                          | 0.460504  | -2.041007 | 1.399052  |
| C                          | 8.546856  | -2.049747 | -0.963040 | O                        | -0.156787 | -0.280891 | 0.656482  | C                          | 0.833540  | -1.768339 | 0.067398  |
| H                          | 8.023003  | -2.314348 | -1.887940 | C                        | -2.369811 | 3.810097  | 1.062071  | C                          | 1.430603  | -2.778734 | -0.712061 |
| H                          | 9.614611  | -2.193307 | -1.119035 | H                        | -3.167282 | 3.067377  | 1.141393  | C                          | 1.639542  | -4.042613 | -0.166661 |
| H                          | 8.218762  | -2.726171 | -0.166422 | H                        | -2.261644 | 4.331962  | 2.015878  | C                          | 1.263347  | -4.314904 | 1.154350  |
| C                          | 9.442627  | 0.267136  | -0.503299 | H                        | -2.619488 | 4.527744  | 0.276862  | H                          | 0.383330  | -3.517074 | 2.957289  |
| H                          | 9.539001  | 0.671490  | 0.510084  | C                        | -4.399624 | -0.196502 | -1.046459 | H                          | 0.008438  | -1.257152 | 2.000743  |
| H                          | 10.354456 | -0.275885 | -0.745737 | C                        | -5.539692 | 0.501732  | -1.344790 | H                          | 1.713932  | -2.553673 | -1.735719 |

|    |            |           |           |                           |           |           |           |                            |           |           |           |
|----|------------|-----------|-----------|---------------------------|-----------|-----------|-----------|----------------------------|-----------|-----------|-----------|
| H  | 2.096306   | -4.819685 | -0.772865 | C                         | 8.433204  | -0.499602 | -1.347014 | C                          | 3.311970  | -0.329724 | -1.568198 |
| H  | 1.428569   | -5.301983 | 1.575491  | H                         | 8.556243  | 0.589493  | -1.374086 | N                          | 2.785303  | -0.081722 | -0.343291 |
| C  | -0.954014  | 0.543535  | -0.065926 | H                         | 9.410696  | -0.951003 | -1.182528 | H                          | 3.112007  | -0.204152 | 1.705080  |
| O  | -1.897495  | -0.158370 | -0.023523 | H                         | 8.061561  | -0.832315 | -2.322906 | H                          | 5.323315  | -1.220281 | 1.545715  |
| O  | 0.613135   | -0.557783 | -0.491041 | <b>M<sub>1RB-10</sub></b> |           |           |           | H                          | 4.891839  | -1.054870 | -2.780161 |
| C  | 1.514462   | 4.062566  | 0.262478  | C                         | -1.811907 | 4.639807  | 1.031234  | H                          | 2.696620  | -0.054701 | -2.419191 |
| O  | 2.199217   | 3.111161  | -0.046462 | C                         | -1.781951 | 3.326284  | 0.590138  | N                          | 6.579606  | -1.812487 | -0.790502 |
| O  | -0.378095  | 1.602821  | -0.025769 | C                         | -0.691969 | 2.869065  | -0.199467 | C                          | 7.139480  | -2.026521 | -2.124116 |
| C  | 0.100731   | 6.140252  | 0.901489  | C                         | 0.343451  | 3.781632  | -0.545346 | H                          | 7.228350  | -1.083701 | -2.676413 |
| H  | 0.505510   | 6.606816  | 1.802670  | C                         | 0.304323  | 5.089893  | -0.081424 | H                          | 8.134339  | -2.458944 | -2.025451 |
| H  | 0.126014   | 6.856902  | 0.076986  | C                         | -0.770499 | 5.526141  | 0.705680  | H                          | 6.521644  | -2.715709 | -2.711519 |
| H  | -0.931653  | 5.832500  | 1.084071  | H                         | -2.642678 | 4.984732  | 1.639763  | C                          | 7.373345  | -2.165601 | 0.385115  |
| C  | -5.573135  | -1.287374 | -0.564355 | H                         | -2.573351 | 2.630080  | 0.849348  | H                          | 6.834532  | -2.867981 | 1.030575  |
| C  | -6.928562  | -1.439113 | -0.671172 | H                         | 1.151148  | 3.433816  | -1.184369 | H                          | 8.295693  | -2.643089 | 0.057764  |
| C  | -7.807881  | -0.412523 | -0.201167 | H                         | 1.101434  | 5.779574  | -0.342133 | H                          | 7.633583  | -1.279085 | 0.975852  |
| C  | -7.191584  | 0.742680  | 0.376600  | H                         | -0.803601 | 6.552334  | 1.058246  | <b>M<sub>1RB-TS8</sub></b> |           |           |           |
| C  | -5.828548  | 0.830035  | 0.453985  | O                         | -0.636519 | 1.607998  | -0.604028 | C                          | -3.394805 | 3.412410  | 0.985727  |
| N  | -5.038975  | -0.169670 | -0.011918 | C                         | 0.229140  | -0.549702 | 2.509954  | C                          | -2.645992 | 2.249408  | 1.138566  |
| H  | -4.870090  | -2.035297 | -0.909205 | O                         | 0.477492  | 0.479790  | 1.936012  | C                          | -1.499314 | 2.046787  | 0.344636  |
| H  | -7.309591  | -2.345891 | -1.119372 | C                         | -0.019370 | -2.696397 | 3.892438  | C                          | -1.127431 | 3.011984  | -0.611898 |
| H  | -7.781192  | 1.562794  | 0.761619  | H                         | -0.254046 | -3.593790 | 3.315432  | C                          | -1.886044 | 4.171310  | -0.751478 |
| H  | -5.319413  | 1.684153  | 0.882690  | H                         | 0.987710  | -2.782732 | 4.307922  | C                          | -3.019959 | 4.377999  | 0.042922  |
| N  | -9.143273  | -0.527002 | -0.298199 | H                         | -0.743723 | -2.598819 | 4.704688  | H                          | -4.273825 | 3.569110  | 1.604087  |
| C  | -10.017674 | 0.548769  | 0.177016  | C                         | -3.163435 | -0.977523 | 0.343037  | H                          | -2.923406 | 1.493236  | 1.866078  |
| H  | -9.805395  | 1.487083  | -0.346216 | C                         | -4.282344 | -1.766490 | 0.328678  | H                          | -0.251843 | 2.849865  | -1.233470 |
| H  | -11.052258 | 0.272488  | -0.018424 | C                         | -5.282402 | -1.578055 | -0.676494 | H                          | -1.593022 | 4.916056  | -1.485654 |
| H  | -9.897983  | 0.709859  | 1.253898  | C                         | -5.037490 | -0.543466 | -1.633386 | H                          | -3.607924 | 5.283250  | -0.073606 |
| C  | -9.745179  | -1.729372 | -0.880950 | C                         | -3.894252 | 0.206123  | -1.559218 | O                          | -0.776469 | 0.913550  | 0.541585  |
| H  | -9.468902  | -2.623163 | -0.311544 | N                         | -2.974208 | -0.009971 | -0.587296 | C                          | 0.978827  | 0.747140  | -0.066437 |
| H  | -10.828373 | -1.626187 | -0.856891 | H                         | -2.385180 | -1.086888 | 1.088789  | O                          | 0.816028  | -0.161087 | -0.886679 |
| H  | -9.431407  | -1.862367 | -1.921806 | H                         | -4.383955 | -2.526023 | 1.091247  | C                          | 1.636367  | 2.504816  | 1.499705  |
| H  | -4.028582  | -0.079737 | 0.054645  | H                         | -5.741969 | -0.330283 | -2.425177 | H                          | 1.561619  | 3.480061  | 1.009544  |
| N  | 0.883769   | 4.997494  | 0.563917  | H                         | -3.671686 | 1.000400  | -2.261308 | H                          | 0.745487  | 2.339174  | 2.110074  |
| Cu | 1.695142   | 1.063073  | -0.196589 | N                         | -6.394721 | -2.333240 | -0.719953 | H                          | 2.516884  | 2.512073  | 2.145518  |
| C  | 4.401507   | 0.757658  | -1.216671 | C                         | -7.395140 | -2.122178 | -1.769559 | C                          | 4.900669  | -0.650110 | 1.033417  |
| C  | 5.716253   | 0.351752  | -1.275461 | H                         | -6.958194 | -2.262976 | -2.763923 | C                          | 6.133580  | -1.242724 | 0.978031  |
| C  | 6.246976   | -0.490733 | -0.256679 | H                         | -8.197240 | -2.846840 | -1.640552 | C                          | 7.098255  | -0.806124 | 0.016248  |
| C  | 5.340542   | -0.868196 | 0.775523  | H                         | -7.822692 | -1.115263 | -1.711465 | C                          | 6.699097  | 0.259873  | -0.850220 |
| C  | 4.039547   | -0.415747 | 0.748887  | C                         | -6.624205 | -3.375427 | 0.283757  | C                          | 5.449265  | 0.807465  | -0.737630 |
| N  | 3.558563   | 0.392533  | -0.222698 | H                         | -6.645725 | -2.951920 | 1.293452  | N                          | 4.568989  | 0.356736  | 0.188970  |
| H  | 3.991776   | 1.401806  | -1.988135 | H                         | -7.585553 | -3.846888 | 0.087887  | H                          | 4.139135  | -0.950601 | 1.742563  |
| H  | 6.323726   | 0.689457  | -2.104410 | H                         | -5.844722 | -4.144007 | 0.241091  | H                          | 6.351943  | -2.042527 | 1.671688  |
| H  | 5.648898   | -1.507410 | 1.591844  | H                         | -2.125433 | 0.577611  | -0.551284 | H                          | 7.367360  | 0.655243  | -1.602246 |
| H  | 3.340154   | -0.703940 | 1.527214  | N                         | -0.104238 | -1.548174 | 3.039205  | H                          | 5.106048  | 1.615669  | -1.371842 |
| N  | 7.534088   | -0.907977 | -0.268675 | Cu                        | 1.013738  | 0.757690  | -0.259949 | N                          | 8.316936  | -1.369374 | -0.068758 |
| C  | 8.044246   | -1.754744 | 0.808481  | C                         | 3.539977  | -0.414986 | 0.730674  | C                          | 9.272453  | -0.922568 | -1.086031 |
| H  | 7.503576   | -2.706893 | 0.858649  | C                         | 4.789227  | -0.988236 | 0.633835  | H                          | 9.546645  | 0.127632  | -0.937895 |
| H  | 9.095837   | -1.967448 | 0.622132  | C                         | 5.355055  | -1.254376 | -0.645863 | H                          | 10.173912 | -1.528260 | -1.011851 |
| H  | 7.960483   | -1.255889 | 1.781011  | C                         | 4.552189  | -0.894553 | -1.765537 | H                          | 8.858272  | -1.040765 | -2.092887 |



|                           |           |           |           |                            |           |           |           |                           |           |           |           |
|---------------------------|-----------|-----------|-----------|----------------------------|-----------|-----------|-----------|---------------------------|-----------|-----------|-----------|
| C                         | 8.704845  | -2.439593 | 0.853947  | C                          | -4.781429 | 0.131939  | 0.890001  | O                         | 0.314631  | 3.155962  | -0.207387 |
| H                         | 8.064732  | -3.320065 | 0.730615  | N                          | -4.001063 | 0.091230  | -0.214074 | C                         | 1.145423  | 2.058687  | -0.151298 |
| H                         | 9.733426  | -2.728143 | 0.645411  | H                          | -3.519639 | -0.843841 | -1.999870 | O                         | 0.654637  | 0.877644  | -0.120077 |
| H                         | 8.644729  | -2.102406 | 1.894056  | H                          | -5.249728 | -2.586669 | -1.772659 | C                         | 2.930340  | 3.667675  | -0.230490 |
| H                         | 3.630723  | 0.776775  | 0.248206  | H                          | -6.365753 | -0.714253 | 2.003216  | H                         | 2.612741  | 4.192165  | -1.138647 |
| N                         | 1.802257  | 1.460628  | 0.502651  | H                          | -4.579733 | 0.935254  | 1.589012  | H                         | 2.610605  | 4.257762  | 0.635513  |
| Cu                        | -1.112340 | -0.700942 | -0.667750 | N                          | -6.960777 | -2.760036 | 0.325434  | H                         | 4.021828  | 3.615456  | -0.227739 |
| C                         | -3.433171 | -1.887831 | 0.610106  | C                          | -7.805566 | -2.734607 | 1.521122  | C                         | 4.681222  | 0.006863  | 1.059749  |
| C                         | -4.757226 | -2.184837 | 0.841411  | H                          | -8.365654 | -1.795741 | 1.591358  | C                         | 5.688356  | -0.928629 | 1.143829  |
| C                         | -5.760237 | -1.708069 | -0.051570 | H                          | -8.518520 | -3.555629 | 1.466180  | C                         | 6.270900  | -1.450918 | -0.047892 |
| C                         | -5.297250 | -0.930370 | -1.152373 | H                          | -7.207860 | -2.855300 | 2.431343  | C                         | 5.747222  | -0.950944 | -1.275644 |
| C                         | -3.951327 | -0.682290 | -1.301751 | C                          | -7.174691 | -3.805268 | -0.677552 | C                         | 4.737046  | -0.015345 | -1.258086 |
| N                         | -3.011650 | -1.151001 | -0.445875 | H                          | -6.281495 | -4.428233 | -0.798043 | N                         | 4.203411  | 0.464710  | -0.115876 |
| H                         | -2.663161 | -2.245313 | 1.286164  | H                          | -7.996772 | -4.441585 | -0.354084 | H                         | 4.225396  | 0.421728  | 1.953981  |
| H                         | -5.009726 | -2.783203 | 1.706460  | H                          | -7.434013 | -3.372478 | -1.650099 | H                         | 6.021730  | -1.249812 | 2.121500  |
| H                         | -5.983073 | -0.522777 | -1.882908 | H                          | -3.235279 | 0.816711  | -0.361115 | H                         | 6.125307  | -1.292202 | -2.229789 |
| H                         | -3.591287 | -0.086863 | -2.134578 | N                          | -2.019342 | 1.945953  | -0.726284 | H                         | 4.323390  | 0.380707  | -2.180773 |
| N                         | -7.072738 | -1.973806 | 0.136307  | Cu                         | 1.217788  | -0.272577 | 0.094140  | N                         | 7.266626  | -2.367782 | -0.015057 |
| C                         | -8.071898 | -1.454387 | -0.796808 | C                          | 3.319500  | -1.953119 | -0.907585 | C                         | 7.841628  | -2.878800 | -1.258664 |
| H                         | -7.877207 | -1.799420 | -1.818189 | C                          | 4.546310  | -2.573006 | -0.954461 | H                         | 8.246599  | -2.065584 | -1.871331 |
| H                         | -9.055154 | -1.813384 | -0.496673 | C                          | 5.486647  | -2.373053 | 0.099051  | H                         | 8.656305  | -3.560247 | -1.017653 |
| H                         | -8.088255 | -0.357981 | -0.796718 | C                          | 5.064463  | -1.522900 | 1.163555  | H                         | 7.097762  | -3.423936 | -1.852029 |
| C                         | -7.511901 | -2.747420 | 1.297258  | C                          | 3.817381  | -0.943894 | 1.127182  | C                         | 7.753239  | -2.880858 | 1.264564  |
| H                         | -7.229872 | -2.255172 | 2.235125  | N                          | 2.946315  | -1.136926 | 0.107425  | H                         | 6.951207  | -3.370395 | 1.829278  |
| H                         | -8.596833 | -2.837507 | 1.271008  | H                          | 2.595522  | -2.093659 | -1.704127 | H                         | 8.536030  | -3.614332 | 1.077245  |
| H                         | -7.082304 | -3.755664 | 1.289686  | H                          | 4.775209  | -3.202878 | -1.803406 | H                         | 8.173268  | -2.078716 | 1.882406  |
| <b>M<sub>1RB-11</sub></b> |           |           |           | H                          | 5.707207  | -1.313611 | 2.007990  | N                         | 2.418217  | 2.301591  | -0.181552 |
| C                         | 2.067637  | 5.481484  | -0.409222 | H                          | 3.484343  | -0.292570 | 1.928978  | H                         | 3.290278  | 1.328194  | -0.149802 |
| C                         | 1.625107  | 4.294855  | -0.991982 | N                          | 6.704090  | -2.958147 | 0.091013  | Cu                        | -1.140442 | 0.252978  | 0.103198  |
| C                         | 0.658475  | 3.530279  | -0.332706 | C                          | 7.641427  | -2.729830 | 1.191199  | C                         | -3.737948 | -0.438578 | -0.915276 |
| C                         | 0.135111  | 3.931750  | 0.898678  | H                          | 7.229005  | -3.080316 | 2.144091  | C                         | -4.902997 | -1.156115 | -1.053604 |
| C                         | 0.587745  | 5.125971  | 1.466261  | H                          | 8.560260  | -3.279027 | 0.991639  | C                         | -5.204686 | -2.207913 | -0.138064 |
| C                         | 1.551526  | 5.903544  | 0.820462  | H                          | 7.888835  | -1.666621 | 1.287726  | C                         | -4.261252 | -2.416241 | 0.911627  |
| H                         | 2.817416  | 6.077919  | -0.920858 | C                          | 7.101785  | -3.823519 | -1.019948 | C                         | -3.121886 | -1.648345 | 0.973385  |
| H                         | 2.012250  | 3.955672  | -1.947659 | H                          | 7.097495  | -3.276833 | -1.969745 | N                         | -2.836672 | -0.682998 | 0.066336  |
| H                         | -0.613286 | 3.332125  | 1.406934  | H                          | 8.111655  | -4.187942 | -0.838628 | H                         | -3.490921 | 0.358131  | -1.609212 |
| H                         | 0.181253  | 5.443562  | 2.422104  | H                          | 6.433855  | -4.687390 | -1.110939 | H                         | -5.566770 | -0.911515 | -1.871786 |
| H                         | 1.898139  | 6.828878  | 1.270146  | <b>M<sub>1RB-TS9</sub></b> |           |           |           | H                         | -4.410977 | -3.179101 | 1.663512  |
| O                         | 0.284320  | 2.353198  | -0.968166 | C                          | -3.284460 | 3.664551  | -0.465484 | H                         | -2.390729 | -1.801934 | 1.760467  |
| C                         | -0.803606 | 1.615199  | -0.499502 | C                          | -1.924645 | 3.678114  | -0.779970 | N                         | -6.319472 | -2.960694 | -0.257740 |
| O                         | -0.473461 | 0.521867  | 0.117720  | C                          | -1.028987 | 3.033857  | 0.070976  | C                         | -6.609676 | -4.014072 | 0.716131  |
| C                         | -2.357477 | 3.182923  | -1.418279 | C                          | -1.479675 | 2.360048  | 1.229278  | H                         | -6.730616 | -3.602414 | 1.724380  |
| H                         | -2.528631 | 3.997747  | -0.704072 | C                          | -2.861365 | 2.353972  | 1.518153  | H                         | -7.536909 | -4.509496 | 0.433035  |
| H                         | -1.585687 | 3.505119  | -2.125370 | C                          | -3.757616 | 3.001187  | 0.676462  | H                         | -5.809604 | -4.762477 | 0.736642  |
| H                         | -3.289846 | 3.028688  | -1.969261 | H                          | -3.983423 | 4.173463  | -1.122167 | C                         | -7.266947 | -2.715660 | -1.346232 |
| C                         | -4.181939 | -0.875987 | -1.142278 | H                          | -1.552273 | 4.192108  | -1.659538 | H                         | -6.771514 | -2.783694 | -2.320577 |
| C                         | -5.149180 | -1.837476 | -0.999549 | H                          | -0.767185 | 2.001545  | 1.968484  | H                         | -8.050061 | -3.471337 | -1.307242 |
| C                         | -5.997510 | -1.833571 | 0.150396  | H                          | -3.207021 | 1.854709  | 2.417395  | H                         | -7.731937 | -1.726927 | -1.257757 |
| C                         | -5.769688 | -0.794618 | 1.104843  | H                          | -4.818019 | 3.003948  | 0.905727  | <b>M<sub>1RB-12</sub></b> |           |           |           |

|    |           |           |           |                           |           |           |           |                |           |           |           |
|----|-----------|-----------|-----------|---------------------------|-----------|-----------|-----------|----------------|-----------|-----------|-----------|
| C  | 0.902788  | 4.568806  | -1.757712 | H                         | 2.018364  | 0.239329  | -1.664985 | O              | 1.637463  | -3.256239 | -2.167409 |
| C  | 1.246820  | 3.759741  | -0.672044 | N                         | 5.865311  | -1.982224 | -0.610252 | C              | 0.685272  | -3.061802 | -0.000881 |
| C  | 0.313689  | 3.581009  | 0.344112  | C                         | 6.675520  | -1.205886 | -1.549483 | C              | -0.493812 | -2.813975 | 0.718562  |
| C  | -0.938039 | 4.186464  | 0.321752  | H                         | 6.674987  | -0.140851 | -1.291152 | C              | 1.723501  | -3.772834 | 0.619739  |
| C  | -1.267632 | 4.993417  | -0.770451 | H                         | 7.701733  | -1.567900 | -1.512229 | C              | -0.622882 | -3.254832 | 2.038281  |
| C  | -0.351516 | 5.183465  | -1.808689 | H                         | 6.307281  | -1.316330 | -2.575586 | C              | 1.602422  | -4.197044 | 1.942672  |
| H  | 1.618764  | 4.719601  | -2.559994 | C                         | 6.505341  | -3.021175 | 0.197106  | H              | 2.623700  | -3.982421 | 0.050812  |
| H  | 2.218309  | 3.279979  | -0.608422 | H                         | 6.021103  | -3.992213 | 0.046096  | C              | 0.427239  | -3.938661 | 2.655935  |
| H  | -1.632053 | 4.032484  | 1.141773  | H                         | 7.548133  | -3.108743 | -0.103666 | H              | -1.545156 | -3.067522 | 2.581634  |
| H  | -2.240292 | 5.474699  | -0.804898 | H                         | 6.472059  | -2.776585 | 1.265208  | H              | 2.420575  | -4.731742 | 2.417432  |
| H  | -0.612695 | 5.812729  | -2.654181 | H                         |           |           |           | H              | 0.329148  | -4.273413 | 3.684975  |
| O  | 0.685450  | 2.827157  | 1.477560  | <b>M1<sub>RB-13</sub></b> |           |           |           | H              | -1.322647 | -2.296034 | 0.244422  |
| C  | 0.465024  | 1.503443  | 1.471354  | C                         | 2.640381  | 1.200317  | 0.131666  | Cu             | -0.456181 | -0.077601 | -0.854111 |
| O  | -0.152340 | 0.956170  | 0.523999  | C                         | 1.249320  | 1.246505  | 0.014793  | C              | 1.453869  | 1.650351  | 0.568170  |
| C  | 1.652608  | 1.542844  | 3.641416  | C                         | 0.554884  | 0.072588  | -0.268467 | C              | 2.641909  | 2.274437  | 0.884520  |
| H  | 2.541807  | 2.059217  | 3.271846  | C                         | 1.217743  | -1.141198 | -0.438277 | C              | 3.823421  | 1.966512  | 0.152254  |
| H  | 1.006167  | 2.261035  | 4.152772  | C                         | 2.608531  | -1.176434 | -0.318290 | C              | 3.676934  | 1.006005  | -0.887591 |
| H  | 1.957055  | 0.770903  | 4.347715  | C                         | 3.321380  | -0.008549 | -0.033509 | C              | 2.447421  | 0.431459  | -1.126782 |
| C  | -2.954716 | -0.108811 | -0.212554 | H                         | 3.190064  | 2.111048  | 0.350739  | N              | 1.334863  | 0.732583  | -0.418481 |
| C  | -4.322885 | -0.246358 | -0.258984 | H                         | 0.703970  | 2.176963  | 0.136909  | H              | 0.545780  | 1.887049  | 1.112771  |
| C  | -4.911525 | -1.544409 | -0.249543 | H                         | 0.648734  | -2.037566 | -0.663954 | H              | 2.650626  | 2.994955  | 1.691847  |
| C  | -4.002435 | -2.641243 | -0.197245 | H                         | 3.133759  | -2.117911 | -0.449929 | H              | 4.514359  | 0.711363  | -1.506044 |
| C  | -2.646589 | -2.407621 | -0.156595 | H                         | 4.403075  | -0.040062 | 0.056671  | H              | 2.325388  | -0.303909 | -1.913932 |
| N  | -2.107548 | -1.164132 | -0.165414 | O                         | -0.825644 | 0.132857  | -0.467524 | N              | 5.013852  | 2.552314  | 0.426977  |
| H  | -2.497291 | 0.873913  | -0.208121 | C                         | -1.632686 | -0.136858 | 0.617115  | C              | 6.202509  | 2.205885  | -0.349602 |
| H  | -4.929413 | 0.648588  | -0.298039 | O                         | -1.207615 | -0.404848 | 1.729188  | H              | 6.083320  | 2.469297  | -1.407486 |
| H  | -4.351115 | -3.665149 | -0.187143 | C                         | -3.444680 | 0.238577  | -1.066172 | H              | 7.055813  | 2.755133  | 0.045929  |
| H  | -1.946059 | -3.236637 | -0.116662 | H                         | -3.110976 | 1.219765  | -1.417592 | H              | 6.424277  | 1.134644  | -0.282445 |
| N  | -6.251096 | -1.722719 | -0.282847 | H                         | -3.131861 | -0.516527 | -1.794529 | C              | 5.115298  | 3.552720  | 1.487414  |
| C  | -6.819757 | -3.069880 | -0.248186 | H                         | -4.534392 | 0.241406  | -1.015013 | H              | 4.845342  | 3.130785  | 2.462496  |
| H  | -6.550024 | -3.594681 | 0.675803  | N                         | -2.933911 | -0.053981 | 0.265900  | H              | 6.143604  | 3.908041  | 1.540769  |
| H  | -7.905292 | -2.996710 | -0.296305 | H                         | -3.588167 | -0.253015 | 1.008938  | H              | 4.464550  | 4.412651  | 1.289762  |
| H  | -6.477525 | -3.667609 | -1.100367 | <b>M1'-1</b>              |           |           |           | <b>M1'-TS1</b> |           |           |           |
| C  | -7.147143 | -0.566497 | -0.308568 | C                         | -2.683139 | 0.676865  | -0.371440 | C              | -1.930072 | 1.358959  | -0.193470 |
| H  | -6.965673 | 0.055519  | -1.192024 | O                         | -1.658190 | 1.366459  | -0.035367 | O              | -0.868426 | 1.076296  | 0.434093  |
| H  | -8.177135 | -0.917982 | -0.343414 | O                         | -2.487326 | -0.418575 | -0.997426 | O              | -2.630756 | 0.466668  | -0.806770 |
| H  | -7.023118 | 0.053487  | 0.586806  | C                         | -4.052385 | 1.137686  | -0.040535 | C              | -2.409737 | 2.767917  | -0.241096 |
| N  | 0.941623  | 0.883861  | 2.545690  | C                         | -5.161596 | 0.359706  | -0.405700 | C              | -3.608804 | 3.085213  | -0.897944 |
| H  | 0.763994  | -0.110231 | 2.612169  | C                         | -6.448477 | 0.791932  | -0.090049 | C              | -4.049867 | 4.406641  | -0.942288 |
| Cu | -0.158802 | -0.985123 | -0.067533 | C                         | -6.633058 | 2.000046  | 0.589874  | C              | -3.298904 | 5.416066  | -0.332184 |
| C  | 2.390746  | -2.161178 | 0.552813  | C                         | -5.529547 | 2.777799  | 0.955058  | C              | -2.103936 | 5.103425  | 0.323504  |
| C  | 3.733774  | -2.442179 | 0.456861  | C                         | -4.240815 | 2.349124  | 0.641863  | C              | -1.658404 | 3.783762  | 0.369249  |
| C  | 4.545947  | -1.727153 | -0.471627 | H                         | -5.005282 | -0.575920 | -0.932173 | H              | -4.184990 | 2.295448  | -1.367241 |
| C  | 3.882543  | -0.726927 | -1.241661 | H                         | -7.306760 | 0.189144  | -0.371981 | H              | -4.977769 | 4.649803  | -1.451542 |
| C  | 2.532509  | -0.515723 | -1.079335 | H                         | -7.636901 | 2.334953  | 0.835669  | H              | -3.644221 | 6.445435  | -0.368284 |
| N  | 1.774564  | -1.222548 | -0.206696 | H                         | -5.675174 | 3.715680  | 1.482933  | H              | -1.520972 | 5.887929  | 0.796914  |
| H  | 1.763111  | -2.701164 | 1.254825  | H                         | -3.376495 | 2.943207  | 0.919429  | H              | -0.732153 | 3.531179  | 0.873661  |
| H  | 4.148668  | -3.210793 | 1.094690  | O                         | 0.186309  | -1.592785 | -1.861265 | O              | 0.093019  | -2.326704 | -1.263877 |
| H  | 4.416111  | -0.126518 | -1.966323 | C                         | 0.866601  | -2.623156 | -1.439321 | C              | -0.777269 | -3.299698 | -1.187595 |



|              |           |           |           |                           |           |           |           |              |           |           |           |
|--------------|-----------|-----------|-----------|---------------------------|-----------|-----------|-----------|--------------|-----------|-----------|-----------|
| C            | -2.129637 | -1.805244 | -0.798170 | H                         | 3.205153  | -0.762108 | 2.091548  | N            | -5.915067 | -0.519072 | 0.594388  |
| N            | -1.439429 | -1.499649 | 0.325498  | H                         | 5.351486  | -1.907684 | 1.880803  | C            | -6.458185 | 0.793800  | 0.253207  |
| H            | -1.612968 | -0.911118 | 2.306905  | H                         | 5.796163  | 0.027620  | -1.986679 | H            | -6.507414 | 0.939825  | -0.832643 |
| H            | -4.049488 | -0.806823 | 2.337644  | H                         | 3.620750  | 1.090136  | -1.583471 | H            | -7.467626 | 0.874473  | 0.654482  |
| H            | -3.969978 | -2.019923 | -1.834811 | N                         | 7.010140  | -1.681089 | -0.258852 | H            | -5.852939 | 1.600756  | 0.682795  |
| H            | -1.526602 | -2.106038 | -1.647961 | C                         | 7.789817  | -1.451387 | -1.473189 | C            | -6.747923 | -1.474397 | 1.321423  |
| N            | -5.638742 | -1.326050 | 0.195956  | H                         | 8.064268  | -0.395131 | -1.580669 | H            | -6.271551 | -1.786198 | 2.258122  |
| C            | -6.351360 | -1.643268 | -1.039126 | H                         | 8.706142  | -2.038301 | -1.422655 | H            | -7.699268 | -1.002255 | 1.564352  |
| H            | -6.175299 | -2.679753 | -1.351321 | H                         | 7.235589  | -1.757177 | -2.368414 | H            | -6.951436 | -2.370301 | 0.722275  |
| H            | -7.420302 | -1.512836 | -0.874673 | C                         | 7.538401  | -2.563780 | 0.778890  | N            | 0.637567  | 0.929018  | 0.614666  |
| H            | -6.047805 | -0.979891 | -1.857578 | H                         | 6.867736  | -3.411309 | 0.963728  | O            | -0.057200 | -0.650613 | 2.283329  |
| C            | -6.396910 | -0.960264 | 1.390004  | H                         | 8.501219  | -2.955725 | 0.453664  | C            | 0.355381  | 0.144845  | 1.526369  |
| H            | -6.120672 | 0.038322  | 1.748604  | H                         | 7.687122  | -2.028292 | 1.724226  | O            | 1.741210  | 1.799944  | 0.816561  |
| H            | -7.458877 | -0.953019 | 1.147353  | N                         | -2.035559 | -2.582823 | -0.140177 | C            | 1.946626  | 2.599317  | -0.333923 |
| H            | -6.235506 | -1.676555 | 2.204662  | O                         | 0.142456  | -2.236123 | 0.799945  | H            | 1.689271  | 2.057868  | -1.247062 |
| N            | 1.182199  | 2.386043  | 2.214630  | C                         | -0.911847 | -2.313093 | 0.287369  | H            | 3.014159  | 2.831808  | -0.331271 |
| N            | 1.122543  | 1.974908  | 4.127016  | O                         | -2.629956 | -1.718384 | -1.092012 | C            | 1.179272  | 3.938942  | -0.295067 |
| N            | 1.211000  | 2.225031  | 5.199248  | C                         | -3.971351 | -2.105709 | -1.330892 | Cl           | 1.742613  | 4.912814  | -1.709540 |
| O            | 0.605265  | 0.088601  | 1.883972  | H                         | -4.095222 | -3.188296 | -1.252539 | Cl           | -0.600798 | 3.707141  | -0.413867 |
| C            | 0.903692  | 1.240242  | 1.638757  | H                         | -4.181406 | -1.782214 | -2.353580 | Cl           | 1.552553  | 4.825310  | 1.227662  |
| O            | 1.095378  | 1.820718  | 0.354377  | C                         | -4.986834 | -1.405950 | -0.401693 |              |           |           |           |
| C            | -0.115051 | 2.144156  | -0.365688 | Cl                        | -6.636844 | -1.857125 | -0.985744 | <b>M1'-5</b> |           |           |           |
| H            | -0.902225 | 2.455523  | 0.324937  | Cl                        | -4.809798 | -1.927380 | 1.311310  | O            | -0.306545 | 1.754876  | -0.118283 |
| H            | -0.428899 | 1.255371  | -0.919806 | Cl                        | -4.786824 | 0.380442  | -0.492501 | C            | -0.148809 | 2.991395  | 0.230356  |
| C            | 0.192851  | 3.277832  | -1.348068 |                           |           |           |           | O            | -1.022508 | 3.741079  | 0.689164  |
| Cl           | -1.321449 | 3.601806  | -2.266959 | <b>M1'-TS<sub>3</sub></b> |           |           |           | C            | 1.256065  | 3.514745  | 0.030164  |
| Cl           | 0.696770  | 4.766110  | -0.474506 | O                         | 1.492397  | -2.469806 | -1.718366 | C            | 2.280664  | 2.749646  | -0.494930 |
| Cl           | 1.494520  | 2.787646  | -2.488424 | C                         | 2.322515  | -3.347612 | -1.238476 | C            | 1.588700  | 4.840076  | 0.370246  |
|              |           |           |           | O                         | 2.443311  | -4.511289 | -1.632088 | C            | 3.575855  | 3.165733  | -0.711548 |
| <b>M1'-4</b> |           |           |           | C                         | 3.239497  | -2.839368 | -0.141816 | C            | 2.884722  | 5.320816  | 0.175819  |
| O            | 1.561971  | 2.274593  | -1.104690 | C                         | 3.168198  | -1.558237 | 0.372215  | H            | 0.807984  | 5.472030  | 0.784614  |
| C            | 0.525982  | 3.072384  | -1.200715 | C                         | 4.234885  | -3.667738 | 0.411165  | C            | 3.877974  | 4.494167  | -0.362094 |
| O            | 0.377984  | 3.876062  | -2.126080 | C                         | 3.969329  | -1.031386 | 1.361734  | H            | 4.336187  | 2.512721  | -1.131684 |
| C            | -0.475476 | 2.933277  | -0.084344 | C                         | 5.078975  | -3.193650 | 1.417042  | H            | 3.124899  | 6.345897  | 0.443531  |
| C            | -0.185932 | 1.985661  | 0.913543  | H                         | 4.324111  | -4.681668 | 0.030691  | H            | 4.885453  | 4.874292  | -0.512343 |
| C            | -1.637525 | 3.711382  | -0.037829 | C                         | 4.952704  | -1.884063 | 1.894892  | Cu           | -2.029805 | 1.001216  | -0.023388 |
| C            | -1.092561 | 1.831291  | 1.969312  | H                         | 3.860019  | -0.010745 | 1.718330  | C            | -4.827800 | 0.736159  | 0.605275  |
| C            | -2.532130 | 3.548168  | 1.021630  | H                         | 5.841440  | -3.846424 | 1.832738  | C            | -6.084343 | 0.170840  | 0.670836  |
| H            | -1.826290 | 4.433870  | -0.827852 | H                         | 5.613276  | -1.520118 | 2.677985  | C            | -6.321080 | -1.106089 | 0.090951  |
| C            | -2.258805 | 2.608996  | 2.023399  | Cu                        | -0.212780 | -2.019941 | -1.107927 | C            | -5.198296 | -1.718411 | -0.531657 |
| H            | -0.906886 | 1.109061  | 2.762905  | C                         | -2.806032 | -2.423855 | 0.104086  | C            | -3.979570 | -1.071970 | -0.545593 |
| H            | -3.437685 | 4.147301  | 1.070751  | C                         | -4.092757 | -2.130231 | 0.506554  | N            | -3.763478 | 0.145457  | 0.009285  |
| H            | -2.956203 | 2.482505  | 2.848483  | C                         | -4.657731 | -0.858235 | 0.212786  | H            | -4.647955 | 1.710328  | 1.048267  |
| Cu           | 1.524376  | 1.129233  | 0.521057  | C                         | -3.818930 | 0.037655  | -0.506139 | H            | -6.872949 | 0.719633  | 1.168500  |
| C            | 3.810309  | -0.614896 | 1.201412  | C                         | -2.544008 | -0.348144 | -0.864400 | H            | -5.272532 | -2.690819 | -1.000597 |
| C            | 5.022942  | -1.260536 | 1.078380  | N                         | -2.012567 | -1.561002 | -0.575436 | H            | -3.123594 | -1.540381 | -1.019863 |
| C            | 5.812625  | -1.066478 | -0.089171 | H                         | -2.374987 | -3.393647 | 0.329976  | N            | -7.539825 | -1.701649 | 0.130743  |
| C            | 5.268644  | -0.187149 | -1.066623 | H                         | -4.650842 | -2.885100 | 1.044925  | C            | -7.736134 | -3.017970 | -0.471614 |
| C            | 4.045821  | 0.413288  | -0.849655 | H                         | -4.155805 | 1.028253  | -0.782108 | H            | -7.109804 | -3.778853 | 0.009781  |
| N            | 3.302274  | 0.217490  | 0.263418  | H                         | -1.902218 | 0.337897  | -1.406763 | H            | -8.779191 | -3.309724 | -0.354602 |

|                |           |           |           |              |           |           |           |                |           |           |           |
|----------------|-----------|-----------|-----------|--------------|-----------|-----------|-----------|----------------|-----------|-----------|-----------|
| H              | -7.502510 | -3.005795 | -1.542640 | H            | -7.294785 | 3.680182  | -0.334562 | O              | 1.935103  | 1.112712  | 0.731327  |
| C              | -8.657101 | -1.046032 | 0.806107  | N            | 2.238816  | 0.189386  | 0.322990  | C              | 1.603117  | 2.153591  | -0.185247 |
| H              | -8.893811 | -0.080247 | 0.344259  | O            | 1.576092  | -0.882070 | 2.392222  | H              | 0.659523  | 2.589827  | 0.150101  |
| H              | -9.537733 | -1.682996 | 0.733417  | C            | 1.904497  | -0.497022 | 1.325657  | H              | 1.501308  | 1.752342  | -1.195124 |
| H              | -8.442102 | -0.877799 | 1.868284  | O            | 2.408734  | 1.579382  | 0.777326  | C              | 2.677424  | 3.254575  | -0.174898 |
| N              | 1.915167  | -1.105550 | -0.297278 | C            | 2.945819  | 2.352873  | -0.264260 | Cl             | 2.122392  | 4.549291  | -1.301508 |
| O              | 0.146045  | -0.975357 | -1.910046 | H            | 2.520583  | 3.354858  | -0.149024 | Cl             | 2.863382  | 3.940494  | 1.479848  |
| C              | 1.069827  | -0.974425 | -1.185885 | H            | 2.676047  | 1.952237  | -1.244960 | Cl             | 4.266581  | 2.619976  | -0.727147 |
| O              | 3.215908  | -0.586371 | -0.518376 | C            | 4.482743  | 2.504668  | -0.192154 | <b>M1'-TS5</b> |           |           |           |
| C              | 4.059972  | -0.915141 | 0.569122  | Cl           | 4.965295  | 3.699396  | -1.463026 | O              | 0.642822  | -1.438124 | 0.132540  |
| H              | 3.505547  | -0.949984 | 1.509785  | Cl           | 4.972946  | 3.129673  | 1.426235  | C              | 1.209161  | -2.228432 | -0.715598 |
| H              | 4.802621  | -0.114552 | 0.606900  | Cl           | 5.334627  | 0.951365  | -0.497771 | O              | 0.662406  | -2.814194 | -1.658961 |
| C              | 4.818997  | -2.245236 | 0.372363  | <b>M1'-6</b> |           |           |           | C              | 2.697901  | -2.432856 | -0.489236 |
| Cl             | 5.997193  | -2.390870 | 1.735063  | O            | 0.418519  | -1.846206 | 0.261393  | C              | 3.457722  | -1.771281 | 0.507497  |
| Cl             | 3.716650  | -3.666371 | 0.395608  | C            | 0.918152  | -2.611414 | -0.660749 | C              | 3.365780  | -3.357462 | -1.295723 |
| Cl             | 5.714376  | -2.225728 | -1.190894 | O            | 0.306264  | -3.068986 | -1.633990 | C              | 4.848086  | -1.971380 | 0.621067  |
| <b>M1'-TS4</b> |           |           |           | C            | 2.370019  | -2.976657 | -0.442072 | C              | 4.735436  | -3.594555 | -1.157127 |
| O              | -0.294545 | -1.623810 | 0.054943  | C            | 3.216939  | -2.234840 | 0.405808  | H              | 2.783593  | -3.880456 | -2.046433 |
| C              | -0.092543 | -2.827327 | -0.374181 | C            | 2.862034  | -4.141435 | -1.042033 | C              | 5.480003  | -2.900689 | -0.195721 |
| O              | -0.946853 | -3.603058 | -0.819567 | C            | 4.515949  | -2.691422 | 0.666366  | H              | 5.407418  | -1.406745 | 1.359808  |
| C              | 1.353182  | -3.269876 | -0.298353 | C            | 4.162219  | -4.582081 | -0.794970 | H              | 5.225966  | -4.309869 | -1.810427 |
| C              | 2.381150  | -2.491512 | 0.191934  | H            | 2.198605  | -4.700784 | -1.693328 | H              | 6.546748  | -3.074201 | -0.093978 |
| C              | 1.735689  | -4.548186 | -0.749014 | C            | 4.989603  | -3.859080 | 0.067945  | Cu             | -1.208118 | -1.087471 | 0.016146  |
| C              | 3.710984  | -2.829182 | 0.283166  | H            | 5.157264  | -2.115834 | 1.327060  | C              | -3.549603 | 0.591992  | -0.149686 |
| C              | 3.065988  | -4.962943 | -0.686854 | H            | 4.525795  | -5.491037 | -1.265693 | C              | -4.885672 | 0.934841  | -0.148269 |
| H              | 0.956547  | -5.194321 | -1.144084 | H            | 6.000722  | -4.199160 | 0.271818  | C              | -5.878147 | -0.072137 | 0.007427  |
| C              | 4.052720  | -4.114135 | -0.174621 | Cu           | -1.385551 | -1.304810 | 0.109325  | C              | -5.391956 | -1.401129 | 0.150867  |
| H              | 4.462928  | -2.156126 | 0.682320  | C            | -3.598047 | 0.403490  | -0.622922 | C              | -4.034203 | -1.644055 | 0.136217  |
| H              | 3.338438  | -5.952992 | -1.040387 | C            | -4.893019 | 0.876221  | -0.672006 | N              | -3.095527 | -0.677200 | -0.009880 |
| H              | 5.089071  | -4.437832 | -0.127058 | C            | -5.926580 | 0.192502  | 0.026388  | H              | -2.792686 | 1.360699  | -0.265953 |
| Cu             | -2.031295 | -0.897271 | -0.004403 | C            | -5.523601 | -0.966838 | 0.745134  | H              | -5.152030 | 1.977215  | -0.264552 |
| C              | -4.038440 | 1.091427  | -0.653466 | C            | -4.201476 | -1.359885 | 0.734578  | H              | -6.065963 | -2.238682 | 0.273557  |
| C              | -5.284872 | 1.681003  | -0.703958 | N            | -3.223374 | -0.701629 | 0.066054  | H              | -3.663325 | -2.657886 | 0.246451  |
| C              | -6.392511 | 1.059703  | -0.062954 | H            | -2.809891 | 0.924063  | -1.156878 | N              | -7.203653 | 0.216956  | 0.019432  |
| C              | -6.111168 | -0.163337 | 0.606431  | H            | -5.096538 | 1.767626  | -1.250634 | C              | -8.188292 | -0.846693 | 0.202626  |
| C              | -4.829966 | -0.673679 | 0.600836  | H            | -6.233971 | -1.556139 | 1.309769  | H              | -8.056397 | -1.354915 | 1.165452  |
| N              | -3.781027 | -0.075586 | -0.014925 | H            | -3.894159 | -2.243542 | 1.284280  | H              | -9.187219 | -0.412831 | 0.179205  |
| H              | -3.194172 | 1.565168  | -1.143571 | N            | -7.214531 | 0.618398  | 0.008480  | H              | -8.121877 | -1.596470 | -0.594547 |
| H              | -5.392982 | 2.616046  | -1.237944 | C            | -8.245316 | -0.125249 | 0.728993  | C              | -7.655854 | 1.599319  | -0.118014 |
| H              | -6.884131 | -0.713406 | 1.126584  | H            | -8.045315 | -0.147687 | 1.807083  | H              | -7.328922 | 2.033876  | -1.069977 |
| H              | -4.615717 | -1.607420 | 1.110493  | H            | -9.207808 | 0.359595  | 0.570275  | H              | -8.744625 | 1.619599  | -0.090261 |
| N              | -7.637727 | 1.598273  | -0.086957 | H            | -8.318396 | -1.158240 | 0.369215  | H              | -7.278964 | 2.228900  | 0.697039  |
| C              | -8.738946 | 0.937210  | 0.609643  | C            | -7.581804 | 1.824473  | -0.729738 | N              | 3.034735  | -0.100808 | 1.157948  |
| H              | -8.549717 | 0.869020  | 1.687875  | H            | -7.383390 | 1.715411  | -1.802861 | O              | 2.196608  | -1.674003 | 2.793868  |
| H              | -9.650531 | 1.514122  | 0.458628  | H            | -8.646795 | 2.010480  | -0.595905 | C              | 2.689929  | -1.140156 | 1.835971  |
| H              | -8.907193 | -0.074838 | 0.223356  | H            | -7.032874 | 2.700516  | -0.364474 | O              | 1.883880  | 1.192074  | 1.443460  |
| C              | -7.879432 | 2.863756  | -0.775595 | N            | 2.373645  | 0.004320  | 0.083596  | C              | 1.435882  | 1.736947  | 0.257197  |
| H              | -7.626897 | 2.793959  | -1.840116 | O            | 2.971630  | -0.693326 | 2.231053  | H              | 0.416056  | 2.115717  | 0.421072  |
| H              | -8.935912 | 3.116103  | -0.692996 | C            | 2.806815  | -0.941792 | 1.044325  | H              | 1.386341  | 0.993213  | -0.545201 |

|    |           |           |           |                |           |           |           |                |           |           |           |
|----|-----------|-----------|-----------|----------------|-----------|-----------|-----------|----------------|-----------|-----------|-----------|
| C  | 2.272366  | 2.943133  | -0.243040 |                |           |           |           | O              | -0.025889 | -1.777116 | 0.315724  |
| Cl | 1.434692  | 3.643346  | -1.688604 |                |           |           |           | C              | -2.373670 | -2.248760 | 0.207086  |
| Cl | 2.376039  | 4.204695  | 1.045039  |                |           |           |           | C              | -3.670151 | -1.956599 | -0.273949 |
| Cl | 3.940768  | 2.461864  | -0.716904 |                |           |           |           | C              | -2.209182 | -3.294858 | 1.132388  |
|    |           |           |           | <b>M1'-7</b>   |           |           |           | C              | -4.746257 | -2.752546 | 0.133264  |
| O  | 0.904264  | -1.131406 | 0.116120  |                |           |           |           | C              | -3.287800 | -4.070703 | 1.541989  |
| C  | 1.484170  | -1.784842 | -0.853197 |                |           |           |           | H              | -1.212112 | -3.504344 | 1.503524  |
| O  | 0.923689  | -2.120520 | -1.902567 |                |           |           |           | C              | -4.558838 | -3.806095 | 1.026248  |
| C  | 2.941589  | -2.115800 | -0.641928 |                |           |           |           | H              | -5.736692 | -2.524485 | -0.248924 |
| C  | 3.598391  | -2.144759 | 0.613220  |                |           |           |           | H              | -3.138044 | -4.880318 | 2.248977  |
| C  | 3.691314  | -2.433865 | -1.785764 |                |           |           |           | H              | -5.409721 | -4.409225 | 1.328619  |
| C  | 4.960509  | -2.483338 | 0.677797  |                |           |           |           | Cu             | 0.825585  | -0.557479 | -1.114791 |
| C  | 5.043758  | -2.754079 | -1.718924 |                |           |           |           | C              | 3.326030  | -1.484997 | -0.000076 |
| H  | 3.173197  | -2.422778 | -2.738595 |                |           |           |           | C              | 4.653475  | -1.462695 | 0.361367  |
| C  | 5.680564  | -2.778643 | -0.475022 |                |           |           |           | C              | 5.462289  | -0.335226 | 0.036919  |
| H  | 5.436974  | -2.508870 | 1.652594  |                |           |           |           | C              | 4.808808  | 0.720247  | -0.663578 |
| H  | 5.594951  | -2.985792 | -2.625323 |                |           |           |           | C              | 3.475631  | 0.608918  | -0.987755 |
| H  | 6.734253  | -3.031342 | -0.400121 |                |           |           |           | N              | 2.724915  | -0.473036 | -0.670078 |
| Cu | -0.981195 | -0.891230 | -0.020443 |                |           |           |           | H              | 2.701120  | -2.335967 | 0.250406  |
| C  | -3.463744 | 0.548819  | -0.378169 |                |           |           |           | H              | 5.056919  | -2.311786 | 0.896233  |
| C  | -4.824810 | 0.771648  | -0.403199 |                |           |           |           | H              | 5.337031  | 1.618879  | -0.952617 |
| C  | -5.723570 | -0.274949 | -0.056873 |                |           |           |           | H              | 2.969902  | 1.407893  | -1.520781 |
| C  | -5.120833 | -1.515618 | 0.290705  |                |           |           |           | N              | 6.769289  | -0.270299 | 0.376512  |
| C  | -3.747049 | -1.640049 | 0.287518  |                |           |           |           | C              | 7.555941  | 0.921930  | 0.062314  |
| N  | -2.898352 | -0.634917 | -0.038630 |                |           |           |           | H              | 7.139791  | 1.813048  | 0.546360  |
| H  | -2.779139 | 1.347918  | -0.642254 |                |           |           |           | H              | 8.573244  | 0.779815  | 0.424274  |
| H  | -5.182522 | 1.751302  | -0.691474 |                |           |           |           | H              | 7.596586  | 1.099310  | -1.018321 |
| H  | -5.716688 | -2.376947 | 0.562655  |                |           |           |           | C              | 7.401008  | -1.375110 | 1.097586  |
| H  | -3.287440 | -2.585860 | 0.555308  |                |           |           |           | H              | 7.325206  | -2.311313 | 0.533545  |
| N  | -7.069324 | -0.100931 | -0.058494 |                |           |           |           | H              | 8.456218  | -1.146376 | 1.238709  |
| C  | -7.956466 | -1.218107 | 0.255973  |                |           |           |           | H              | 6.944476  | -1.523507 | 2.083346  |
| H  | -7.750149 | -1.621414 | 1.253829  |                |           |           |           | N              | -3.943457 | -0.914801 | -1.199869 |
| H  | -8.987148 | -0.866216 | 0.239193  |                |           |           |           | O              | -4.212926 | 1.263578  | -1.812491 |
| H  | -7.857701 | -2.031317 | -0.473954 |                |           |           |           | C              | -3.818210 | 0.431236  | -1.016583 |
| C  | -7.646096 | 1.179882  | -0.460832 |                |           |           |           | O              | -3.231150 | 0.727619  | 0.184492  |
| H  | -7.403111 | 1.423953  | -1.502456 |                |           |           |           | C              | -3.230435 | 2.095674  | 0.565701  |
| H  | -8.729920 | 1.125198  | -0.365722 |                |           |           |           | H              | -3.675545 | 2.164549  | 1.561076  |
| H  | -7.287813 | 1.995371  | 0.177765  |                |           |           |           | H              | -3.804094 | 2.692429  | -0.145183 |
| N  | 2.990300  | -1.890408 | 1.842944  |                |           |           |           | C              | -1.804178 | 2.662004  | 0.645386  |
| O  | 1.028714  | -1.199868 | 2.997198  |                |           |           |           | Cl             | -1.939140 | 4.354102  | 1.261469  |
| C  | 1.936466  | -1.520406 | 2.314247  |                |           |           |           | Cl             | -0.792219 | 1.700886  | 1.785309  |
| O  | 2.945308  | 1.543220  | 1.726948  |                |           |           |           | Cl             | -1.013415 | 2.685567  | -0.970698 |
| C  | 1.836961  | 1.777132  | 1.004201  |                |           |           |           | H              | -4.537374 | -1.153617 | -1.985285 |
| H  | 0.976295  | 2.013683  | 1.658468  |                |           |           |           |                |           |           |           |
| H  | 1.541603  | 0.825854  | 0.497848  |                |           |           |           | <b>M1'-TS7</b> |           |           |           |
| C  | 1.990648  | 2.899842  | -0.057419 |                |           |           |           | O              | -0.773664 | -2.204364 | 1.077747  |
| Cl | 0.440417  | 3.066183  | -0.963356 |                |           |           |           | C              | -1.709745 | -1.698562 | 1.637261  |
| Cl | 2.377351  | 4.463174  | 0.756624  |                |           |           |           | O              | -2.305530 | -1.218743 | 2.533697  |
| Cl | 3.318352  | 2.492296  | -1.202753 |                |           |           |           | C              | -3.280359 | -1.789602 | 0.116251  |
|    |           |           |           |                |           |           |           | C              | -2.943103 | -1.763859 | -1.233257 |
|    |           |           |           | <b>M1'-TS6</b> |           |           |           |                |           |           |           |
|    |           |           |           | O              | 0.340261  | -1.882704 | 0.465642  |                |           |           |           |
|    |           |           |           | C              | 0.958650  | -2.313297 | -0.588737 |                |           |           |           |
|    |           |           |           | O              | 0.447467  | -2.508351 | -1.697451 |                |           |           |           |
|    |           |           |           | C              | 2.420886  | -2.641266 | -0.378655 |                |           |           |           |
|    |           |           |           | C              | 3.231291  | -2.100325 | 0.666615  |                |           |           |           |
|    |           |           |           | C              | 3.007375  | -3.556302 | -1.254467 |                |           |           |           |
|    |           |           |           | C              | 4.576955  | -2.525217 | 0.800920  |                |           |           |           |
|    |           |           |           | C              | 4.333405  | -3.970646 | -1.110295 |                |           |           |           |
|    |           |           |           | H              | 2.393453  | -3.948581 | -2.057742 |                |           |           |           |
|    |           |           |           | C              | 5.119998  | -3.453557 | -0.071485 |                |           |           |           |
|    |           |           |           | H              | 5.167908  | -2.092718 | 1.601647  |                |           |           |           |
|    |           |           |           | H              | 4.751236  | -4.695005 | -1.802848 |                |           |           |           |
|    |           |           |           | H              | 6.151832  | -3.769699 | 0.045601  |                |           |           |           |
|    |           |           |           | Cu             | -1.462887 | -1.325010 | 0.260672  |                |           |           |           |
|    |           |           |           | C              | -3.558317 | 0.632225  | -0.025933 |                |           |           |           |
|    |           |           |           | C              | -4.834248 | 1.144079  | -0.138355 |                |           |           |           |
|    |           |           |           | C              | -5.957615 | 0.273578  | -0.080565 |                |           |           |           |
|    |           |           |           | C              | -5.660372 | -1.105438 | 0.102950  |                |           |           |           |
|    |           |           |           | C              | -4.348908 | -1.521058 | 0.205418  |                |           |           |           |
|    |           |           |           | N              | -3.284827 | -0.684213 | 0.144042  |                |           |           |           |
|    |           |           |           | H              | -2.701814 | 1.296783  | -0.071399 |                |           |           |           |
|    |           |           |           | H              | -4.953312 | 2.211640  | -0.268430 |                |           |           |           |
|    |           |           |           | H              | -6.444463 | -1.848776 | 0.164216  |                |           |           |           |
|    |           |           |           | H              | -4.122601 | -2.573396 | 0.342612  |                |           |           |           |
|    |           |           |           | N              | -7.230865 | 0.728819  | -0.194251 |                |           |           |           |
|    |           |           |           | C              | -8.355642 | -0.197207 | -0.083657 |                |           |           |           |
|    |           |           |           | H              | -8.379840 | -0.687085 | 0.897405  |                |           |           |           |
|    |           |           |           | H              | -9.284493 | 0.357142  | -0.212079 |                |           |           |           |
|    |           |           |           | H              | -8.310813 | -0.973412 | -0.856344 |                |           |           |           |
|    |           |           |           | C              | -7.490380 | 2.156806  | -0.363939 |                |           |           |           |
|    |           |           |           | H              | -6.985648 | 2.548714  | -1.254236 |                |           |           |           |
|    |           |           |           | H              | -8.561918 | 2.309901  | -0.487370 |                |           |           |           |
|    |           |           |           | H              | -7.156702 | 2.735504  | 0.506294  |                |           |           |           |
|    |           |           |           | N              | 2.822310  | -1.169020 | 1.581346  |                |           |           |           |
|    |           |           |           | O              | 1.042556  | 0.285785  | 2.174080  |                |           |           |           |
|    |           |           |           | C              | 1.842134  | -0.386908 | 1.628037  |                |           |           |           |
|    |           |           |           | O              | 2.314575  | 0.511968  | -0.200578 |                |           |           |           |
|    |           |           |           | C              | 1.810199  | 1.769325  | -0.241042 |                |           |           |           |
|    |           |           |           | H              | 1.146215  | 1.973905  | 0.619497  |                |           |           |           |
|    |           |           |           | H              | 1.193061  | 1.917276  | -1.146786 |                |           |           |           |
|    |           |           |           | C              | 2.895890  | 2.880993  | -0.252553 |                |           |           |           |
|    |           |           |           | Cl             | 2.080591  | 4.494936  | -0.321122 |                |           |           |           |
|    |           |           |           | Cl             | 3.906158  | 2.791718  | 1.240199  |                |           |           |           |
|    |           |           |           | Cl             | 3.970229  | 2.699565  | -1.690640 |                |           |           |           |
|    |           |           |           |                |           |           |           | <b>M1'-8</b>   |           |           |           |
|    |           |           |           | O              | -1.122415 | -0.809200 | -1.295041 |                |           |           |           |
|    |           |           |           | C              | -1.148447 | -1.574027 | -0.267609 |                |           |           |           |



|                                                                         |           |           |           |                                               |           |           |           |                                                                         |           |           |           |
|-------------------------------------------------------------------------|-----------|-----------|-----------|-----------------------------------------------|-----------|-----------|-----------|-------------------------------------------------------------------------|-----------|-----------|-----------|
| Cl                                                                      | 3.289305  | -3.798522 | 0.176570  | C                                             | 0.406993  | 2.535427  | -1.634815 | C                                                                       | -5.096304 | -1.986126 | -0.638201 |
| C                                                                       | 0.071785  | 1.213421  | -1.118277 | C                                             | 1.128994  | 3.440117  | -0.805430 | H                                                                       | -3.547540 | -3.294801 | -1.377398 |
| C                                                                       | 0.595793  | 2.356687  | -1.665735 | C                                             | 1.324763  | 3.033205  | 0.542685  | H                                                                       | -1.704988 | -1.988292 | -0.366372 |
| C                                                                       | 1.283591  | 3.297050  | -0.840263 | C                                             | 0.811224  | 1.826418  | 0.975293  | H                                                                       | -4.559607 | 0.796149  | 1.248900  |
| C                                                                       | 1.384845  | 2.962321  | 0.540437  | N                                             | 0.134528  | 0.993580  | 0.173891  | H                                                                       | -6.412908 | -0.510939 | 0.226085  |
| C                                                                       | 0.822735  | 1.801716  | 1.013160  | H                                             | -0.601416 | 0.639559  | -1.726809 | H                                                                       | -5.903137 | -2.560266 | -1.084431 |
| N                                                                       | 0.175804  | 0.942082  | 0.203038  | H                                             | 0.214842  | 2.755258  | -2.676674 | C                                                                       | -1.970364 | 0.303766  | 1.162564  |
| H                                                                       | -0.444742 | 0.475745  | -1.718419 | H                                             | 1.877081  | 3.642296  | 1.245877  | O                                                                       | -2.148911 | 1.256441  | 1.875711  |
| H                                                                       | 0.480427  | 2.516550  | -2.728866 | H                                             | 0.948335  | 1.490526  | 1.999000  | N                                                                       | -1.626706 | 1.655245  | -1.543401 |
| H                                                                       | 1.912497  | 3.593480  | 1.242013  | N                                             | 1.603972  | 4.622815  | -1.277126 | N                                                                       | -2.646473 | 2.252012  | -1.429253 |
| H                                                                       | 0.884432  | 1.502218  | 2.052186  | C                                             | 2.365860  | 5.509626  | -0.402427 | N                                                                       | -3.667972 | 2.844282  | -1.315799 |
| N                                                                       | 1.812873  | 4.433877  | -1.343068 | H                                             | 3.275727  | 5.022895  | -0.031542 |                                                                         |           |           |           |
| C                                                                       | 2.552665  | 5.349046  | -0.474035 | H                                             | 2.657667  | 6.396464  | -0.963810 | <b>M<sub>2RA</sub>'-TS<sub>5</sub>/ M<sub>1RA</sub>'-TS<sub>5</sub></b> |           |           |           |
| H                                                                       | 3.449171  | 4.872308  | -0.060825 | H                                             | 1.770997  | 5.830777  | 0.461013  | C                                                                       | -0.270157 | 0.584518  | -0.718356 |
| H                                                                       | 2.860795  | 6.216854  | -1.055075 | C                                             | 1.372960  | 5.007058  | -2.666358 | O                                                                       | -0.490825 | 1.775554  | -0.649886 |
| H                                                                       | 1.928102  | 5.695306  | 0.356162  | H                                             | 0.301739  | 5.063646  | -2.892991 | O                                                                       | -1.255816 | -0.350024 | -1.002541 |
| C                                                                       | 1.731526  | 4.718563  | -2.775575 | H                                             | 1.809184  | 5.989992  | -2.839635 | C                                                                       | -2.571971 | 0.142228  | -1.150749 |
| H                                                                       | 0.690862  | 4.738680  | -3.115250 | H                                             | 1.835546  | 4.298716  | -3.364458 | C                                                                       | -3.476668 | -0.387083 | -0.027071 |
| H                                                                       | 2.170123  | 5.696621  | -2.966722 | C                                             | -4.366526 | -1.097837 | -0.448363 | H                                                                       | -2.975006 | -0.215665 | -2.102126 |
| H                                                                       | 2.277389  | 3.972413  | -3.364947 | C                                             | -5.663989 | -1.304688 | -0.915313 | H                                                                       | -2.585065 | 1.233658  | -1.125225 |
| C                                                                       | -4.418777 | -1.001862 | -0.389819 | C                                             | -6.701605 | -0.465081 | -0.501499 | Cl                                                                      | -3.531870 | -2.190969 | -0.041212 |
| C                                                                       | -5.737894 | -1.262325 | -0.760570 | C                                             | -6.441406 | 0.585821  | 0.383345  | Cl                                                                      | -2.891334 | 0.162822  | 1.585789  |
| C                                                                       | -6.760701 | -0.391820 | -0.374427 | C                                             | -5.147063 | 0.795622  | 0.852689  | Cl                                                                      | -5.140977 | 0.255821  | -0.310622 |
| C                                                                       | -6.462443 | 0.743327  | 0.385360  | C                                             | -4.101710 | -0.044259 | 0.440021  | O                                                                       | 0.846854  | -0.077762 | -0.566862 |
| C                                                                       | -5.145511 | 1.006090  | 0.756784  | H                                             | -3.561690 | -1.749407 | -0.768299 | C                                                                       | 3.957429  | -2.322779 | 1.043283  |
| C                                                                       | -4.114909 | 0.136524  | 0.371527  | H                                             | -5.865412 | -2.121649 | -1.601742 | C                                                                       | 2.986811  | -1.353961 | 0.789013  |
| H                                                                       | -3.623726 | -1.676340 | -0.686453 | H                                             | -7.711158 | -0.629218 | -0.867178 | C                                                                       | 3.224249  | -0.351228 | -0.159783 |
| H                                                                       | -5.967985 | -2.145272 | -1.349679 | H                                             | -7.246677 | 1.239070  | 0.705850  | C                                                                       | 4.442962  | -0.328944 | -0.844790 |
| H                                                                       | -7.787224 | -0.597438 | -0.664203 | H                                             | -4.929342 | 1.606420  | 1.539671  | C                                                                       | 5.416197  | -1.297782 | -0.588806 |
| H                                                                       | -7.255762 | 1.420824  | 0.687348  | C                                             | -2.735967 | 0.227612  | 0.978771  | C                                                                       | 5.175486  | -2.297451 | 0.355537  |
| H                                                                       | -4.897829 | 1.882368  | 1.346506  | O                                             | -2.480088 | 1.116451  | 1.763166  | H                                                                       | 3.764791  | -3.099246 | 1.778534  |
| C                                                                       | -2.716672 | 0.464228  | 0.800177  | O                                             | -1.823522 | -0.638069 | 0.457134  | H                                                                       | 2.042680  | -1.374373 | 1.322550  |
| O                                                                       | -2.443879 | 1.436309  | 1.484201  |                                               |           |           |           | H                                                                       | 4.613133  | 0.452796  | -1.577937 |
| O                                                                       | -1.827501 | -0.422605 | 0.324006  | <b>M<sub>2RA</sub>'-6/ M<sub>1RA</sub>'-6</b> |           |           |           | H                                                                       | 6.359267  | -1.271890 | -1.127885 |
|                                                                         |           |           |           | C                                             | 0.442817  | 0.427753  | 1.173088  | H                                                                       | 5.930075  | -3.053051 | 0.555608  |
| <b>M<sub>2RA</sub>'-TS<sub>4</sub>/ M<sub>1RA</sub>'-TS<sub>4</sub></b> |           |           |           | O                                             | 0.580620  | 1.596563  | 1.411730  | C                                                                       | 2.220099  | 0.741209  | -0.481267 |
| C                                                                       | -0.482490 | -0.675177 | 0.949331  | O                                             | 1.432531  | -0.493178 | 1.068870  | O                                                                       | 2.404177  | 1.558430  | -1.374259 |
| O                                                                       | -0.202689 | -0.644083 | 2.133543  | C                                             | 2.770211  | -0.019425 | 1.196815  | N                                                                       | 1.945220  | 1.454190  | 1.109475  |
| N                                                                       | 4.046693  | 0.268606  | 1.535298  | C                                             | 3.524467  | -0.218732 | -0.125856 | N                                                                       | 1.936243  | 2.658164  | 0.993922  |
| N                                                                       | 3.640815  | 0.895715  | 2.457823  | H                                             | 3.263428  | -0.610257 | 1.971341  | N                                                                       | 1.944175  | 3.806984  | 0.860254  |
| N                                                                       | 3.243317  | 1.527782  | 3.379807  | H                                             | 2.784834  | 1.038191  | 1.463729  |                                                                         |           |           |           |
| O                                                                       | 0.116008  | -1.550540 | 0.050308  | Cl                                            | 3.543164  | -1.958743 | -0.595749 | <b>M<sub>2RA</sub>'-7/M<sub>1RA</sub>'-7</b>                            |           |           |           |
| C                                                                       | 1.379161  | -2.016472 | 0.488128  | Cl                                            | 2.760725  | 0.736663  | -1.447159 | C                                                                       | -0.426405 | 0.493892  | -0.893639 |
| C                                                                       | 1.896667  | -3.011209 | -0.550593 | Cl                                            | 5.217040  | 0.347471  | 0.127508  | O                                                                       | -0.542795 | 1.592832  | -0.327445 |
| H                                                                       | 1.297163  | -2.532483 | 1.449331  | O                                             | -0.698645 | -0.261518 | 0.945973  | O                                                                       | -1.690619 | -0.152248 | -1.319398 |
| H                                                                       | 2.109624  | -1.202842 | 0.586923  | C                                             | -3.770940 | -2.400630 | -0.803448 | C                                                                       | -2.872240 | 0.489024  | -0.969315 |
| Cl                                                                      | 0.758513  | -4.400181 | -0.744157 | C                                             | -2.731691 | -1.668238 | -0.234797 | C                                                                       | -3.702130 | -0.355646 | 0.016172  |
| Cl                                                                      | 2.123894  | -2.218222 | -2.155719 | C                                             | -3.018695 | -0.512789 | 0.510049  | H                                                                       | -3.508879 | 0.646000  | -1.850525 |
| Cl                                                                      | 3.488826  | -3.635841 | 0.027186  | C                                             | -4.350579 | -0.098966 | 0.673887  | H                                                                       | -2.663967 | 1.451106  | -0.489499 |
| C                                                                       | -0.055220 | 1.345912  | -1.108774 | C                                             | -5.384352 | -0.834728 | 0.099374  | Cl                                                                      | -4.133387 | -1.959973 | -0.704714 |



|                             |           |           |           |                             |           |           |           |                                                                    |           |           |           |
|-----------------------------|-----------|-----------|-----------|-----------------------------|-----------|-----------|-----------|--------------------------------------------------------------------|-----------|-----------|-----------|
| Cl                          | -2.800526 | -0.645563 | 1.552682  | C                           | 0.145315  | 1.529022  | 0.402681  | O                                                                  | 0.802356  | 0.785884  | -1.939425 |
| Cl                          | -5.236857 | 0.536500  | 0.394908  | O                           | 0.320975  | 1.545692  | 1.629601  | N                                                                  | 1.588798  | 0.195479  | 0.239005  |
| O                           | 0.545233  | -0.200256 | -1.209843 | O                           | 0.879937  | 0.490895  | -0.349404 | <b>M2<sub>RA</sub>'-9/ M1<sub>RA</sub>'-12/ M2<sub>RA</sub>'-5</b> |           |           |           |
| C                           | 4.153893  | -2.138821 | 1.386984  | C                           | 1.747131  | -0.315578 | 0.378771  | O                                                                  | 0.575812  | -0.544840 | -0.858582 |
| C                           | 3.548724  | -0.896193 | 1.205063  | C                           | 3.207124  | -0.122140 | -0.072546 | C                                                                  | 1.721854  | 0.220285  | -1.081016 |
| C                           | 3.815165  | -0.150517 | 0.046931  | H                           | 1.516210  | -1.377704 | 0.224933  | C                                                                  | 2.765457  | -0.005798 | 0.027343  |
| C                           | 4.690191  | -0.661923 | -0.923922 | H                           | 1.692293  | -0.076801 | 1.445992  | H                                                                  | 1.481075  | 1.286885  | -1.106538 |
| C                           | 5.292512  | -1.903326 | -0.738188 | Cl                          | 3.405383  | -0.537235 | -1.823719 | H                                                                  | 2.194069  | -0.076025 | -2.025217 |
| C                           | 5.025349  | -2.643345 | 0.417921  | Cl                          | 3.750755  | 1.580784  | 0.175262  | Cl                                                                 | 2.134654  | 0.511296  | 1.635811  |
| H                           | 3.945105  | -2.713806 | 2.284124  | Cl                          | 4.266100  | -1.225329 | 0.904723  | Cl                                                                 | 3.239568  | -1.748266 | 0.128539  |
| H                           | 2.871170  | -0.505115 | 1.955973  | O                           | -0.545700 | 2.215756  | -0.363072 | Cl                                                                 | 4.237509  | 0.972414  | -0.373463 |
| H                           | 4.888056  | -0.075389 | -1.814744 | C                           | -4.925440 | 1.521546  | -0.281546 | C                                                                  | -5.204785 | -1.089460 | 0.248143  |
| H                           | 5.969563  | -2.294585 | -1.491630 | C                           | -3.661894 | 0.938830  | -0.176923 | C                                                                  | -3.862183 | -1.346116 | -0.010380 |
| H                           | 5.496169  | -3.611433 | 0.563074  | C                           | -3.561786 | -0.448825 | -0.012400 | C                                                                  | -2.908943 | -0.305249 | -0.166609 |
| C                           | 3.211042  | 1.183688  | -0.197722 | C                           | -4.713437 | -1.248074 | 0.046352  | C                                                                  | -3.399998 | 1.022727  | -0.043407 |
| O                           | 3.413157  | 1.861323  | -1.190274 | C                           | -5.967258 | -0.648670 | -0.060851 | C                                                                  | -4.749232 | 1.270052  | 0.217685  |
| N                           | 2.408933  | 1.634213  | 0.895180  | C                           | -6.079136 | 0.735256  | -0.224575 | C                                                                  | -5.667475 | 0.227079  | 0.366147  |
| N                           | 1.880850  | 2.745177  | 0.722202  | H                           | -5.006916 | 2.597251  | -0.409071 | H                                                                  | -5.896582 | -1.921730 | 0.358733  |
| N                           | 1.380139  | 3.758128  | 0.666662  | H                           | -2.750675 | 1.532064  | -0.221918 | H                                                                  | -3.507141 | -2.369992 | -0.100690 |
| <b>M2<sub>RA</sub>'-TS6</b> |           |           |           | H                           | -4.616629 | -2.321963 | 0.174795  | H                                                                  | -2.705487 | 1.844376  | -0.157950 |
| C                           | 2.201476  | 2.115279  | -0.306299 | H                           | -6.858891 | -1.267429 | -0.016672 | H                                                                  | -5.086919 | 2.301059  | 0.305871  |
| C                           | 2.719194  | 0.842917  | -0.061144 | H                           | -7.059121 | 1.195807  | -0.306733 | H                                                                  | -6.714951 | 0.432486  | 0.568376  |
| C                           | 4.086561  | 0.703135  | 0.216103  | C                           | -1.664139 | -2.028134 | 0.205483  | C                                                                  | -0.644097 | 0.175963  | -0.621897 |
| C                           | 4.944323  | 1.813860  | 0.198166  | O                           | -0.937192 | -2.955529 | 0.319005  | O                                                                  | -0.605246 | 1.415050  | -0.666258 |
| C                           | 4.415677  | 3.079390  | -0.047099 | N                           | -2.285336 | -1.006413 | 0.090918  | N                                                                  | -1.604512 | -0.711167 | -0.415001 |
| C                           | 3.046640  | 3.229132  | -0.298537 | <b>M2<sub>RA</sub>'-TS7</b> |           |           |           | <b>M2<sub>RA</sub>'-TS6'</b>                                       |           |           |           |
| H                           | 1.137518  | 2.204900  | -0.510114 | C                           | -0.943004 | 2.700161  | 0.318969  | C                                                                  | 0.580968  | -2.415119 | -1.590256 |
| H                           | 2.046647  | -0.013269 | -0.078093 | O                           | -2.046333 | 3.070760  | 0.002958  | O                                                                  | 0.760860  | -2.897939 | -0.538237 |
| H                           | 6.005919  | 1.684222  | 0.386219  | O                           | -0.811243 | 0.946882  | -0.005944 | O                                                                  | -0.118077 | -0.078687 | -0.546584 |
| H                           | 5.069735  | 3.946258  | -0.050916 | C                           | -1.855238 | 0.423810  | -0.751747 | C                                                                  | -0.722526 | -0.255512 | 0.657366  |
| H                           | 2.642238  | 4.217692  | -0.497846 | C                           | -2.547154 | -0.753564 | -0.034185 | C                                                                  | -2.270014 | -0.341254 | 0.530204  |
| C                           | 4.637617  | -0.668820 | 0.669124  | H                           | -1.512915 | 0.052147  | -1.727567 | H                                                                  | -0.559928 | 0.574796  | 1.367104  |
| O                           | 4.715618  | -1.087429 | 1.816908  | H                           | -2.627198 | 1.184319  | -0.918874 | H                                                                  | -0.439419 | -1.190828 | 1.179071  |
| N                           | 4.938293  | -1.102593 | -0.537696 | Cl                          | -1.409533 | -2.132570 | 0.225636  | Cl                                                                 | -2.956656 | 1.172041  | -0.183275 |
| N                           | 5.598745  | -2.686087 | -0.335847 | Cl                          | -3.201040 | -0.239621 | 1.568573  | Cl                                                                 | -2.766940 | -1.735267 | -0.517851 |
| N                           | 6.035897  | -3.602911 | -0.781160 | Cl                          | -3.923503 | -1.328247 | -1.070251 | Cl                                                                 | -3.002736 | -0.585088 | 2.184141  |
| C                           | -0.904626 | -0.182692 | -0.599503 | O                           | 0.120664  | 3.028406  | 0.772285  | O                                                                  | 0.440001  | -2.071635 | -2.699772 |
| O                           | -0.918920 | 1.045763  | -0.791445 | C                           | 4.933345  | -0.957852 | 1.294789  | C                                                                  | 3.419469  | 0.109740  | 2.248599  |
| O                           | -2.178494 | -0.884955 | -0.796123 | C                           | 3.581733  | -0.617134 | 1.299176  | C                                                                  | 2.411405  | 0.751755  | 1.523996  |
| C                           | -3.292237 | -0.107259 | -1.100509 | C                           | 2.960010  | -0.128268 | 0.136492  | C                                                                  | 2.299652  | 0.556488  | 0.141126  |
| C                           | -4.343293 | -0.167898 | 0.022993  | C                           | 3.732362  | 0.013710  | -1.032330 | C                                                                  | 3.223405  | -0.278697 | -0.503679 |
| H                           | -3.786694 | -0.478941 | -2.007398 | C                           | 5.085317  | -0.327198 | -1.027181 | C                                                                  | 4.226936  | -0.920849 | 0.219625  |
| H                           | -3.009263 | 0.941007  | -1.237358 | C                           | 5.695433  | -0.815035 | 0.131578  | C                                                                  | 4.328078  | -0.730029 | 1.601458  |
| Cl                          | -4.901009 | -1.867587 | 0.300047  | H                           | 5.392643  | -1.335184 | 2.204552  | H                                                                  | 3.496118  | 0.271942  | 3.320334  |
| Cl                          | -3.683017 | 0.476141  | 1.573568  | H                           | 2.984375  | -0.723277 | 2.199972  | H                                                                  | 1.720946  | 1.414255  | 2.033781  |
| Cl                          | -5.771588 | 0.835052  | -0.471321 | H                           | 3.272492  | 0.390226  | -1.940172 | H                                                                  | 3.139829  | -0.410117 | -1.577550 |
| O                           | -0.010602 | -0.978917 | -0.281882 | H                           | 5.665761  | -0.209212 | -1.938553 | H                                                                  | 4.934237  | -1.566617 | -0.293932 |
| <b>M2<sub>RA</sub>'-8</b>   |           |           |           | H                           | 6.748984  | -1.078622 | 0.128194  | H                                                                  | 5.111479  | -1.227307 | 2.166544  |
|                             |           |           |           | C                           | 0.942197  | 0.561914  | -0.773370 |                                                                    |           |           |           |

|                           |           |           |           |                            |           |           |           |                          |           |           |           |
|---------------------------|-----------|-----------|-----------|----------------------------|-----------|-----------|-----------|--------------------------|-----------|-----------|-----------|
| C                         | 1.248283  | 1.216458  | -0.719635 | C                          | -4.594171 | -4.564525 | -2.138564 | C                        | -5.519013 | -3.902075 | 0.258102  |
| O                         | 1.392770  | 1.368066  | -1.929149 | C                          | -4.496903 | -4.940561 | -0.794938 | H                        | -4.629784 | -2.465194 | 1.607840  |
| N                         | 0.580126  | 2.338910  | 0.082430  | H                          | -3.696613 | -4.445427 | 1.140120  | H                        | -2.110974 | -3.808442 | -1.632045 |
| N                         | -0.078659 | 3.097335  | -0.614522 | H                          | -2.745136 | -1.708660 | -2.053775 | H                        | -3.947334 | -5.278398 | -2.443238 |
| N                         | -0.692037 | 3.840737  | -1.232120 | H                          | -4.040913 | -3.113850 | -3.639225 | H                        | -6.112159 | -5.342074 | -1.229071 |
|                           |           |           |           | H                          | -5.161256 | -5.179142 | -2.831590 | H                        | -6.464082 | -3.941609 | 0.790188  |
|                           |           |           |           | H                          | -4.987004 | -5.843369 | -0.444461 | O                        | -1.929725 | -0.990733 | -0.171839 |
| <b>M<sub>2RA</sub>-8'</b> |           |           |           | O                          | -1.872476 | -1.047564 | 0.184597  | C                        | -2.193569 | -2.055691 | 0.430162  |
| O                         | 0.140771  | -0.168610 | 1.106353  | C                          | -2.364132 | -2.131460 | 0.551512  | O                        | 0.746905  | -1.657717 | -0.379630 |
| C                         | 0.619798  | -0.041215 | -0.230261 | O                          | 0.704095  | -1.641494 | 1.034031  | Cu                       | -0.125529 | 0.019601  | -0.207778 |
| C                         | 2.000959  | -0.703828 | -0.319289 | Cu                         | -0.119904 | 0.016020  | 0.614780  | C                        | -1.165893 | 2.430851  | 0.994144  |
| H                         | 0.715969  | 1.022608  | -0.483481 | C                          | -0.778292 | 2.744011  | 1.175638  | C                        | -1.883743 | 3.600731  | 1.086023  |
| H                         | -0.035621 | -0.534215 | -0.950500 | C                          | -1.323090 | 3.998938  | 1.034639  | C                        | -2.445133 | 4.185402  | -0.087041 |
| Cl                        | 3.168818  | 0.080375  | 0.807057  | C                          | -2.077848 | 4.318746  | -0.131560 | C                        | -2.199573 | 3.494328  | -1.309866 |
| Cl                        | 1.904594  | -2.464417 | 0.070733  | C                          | -2.220987 | 3.272656  | -1.090351 | C                        | -1.469933 | 2.328049  | -1.305418 |
| Cl                        | 2.587976  | -0.503382 | -2.015015 | C                          | -1.640460 | 2.045584  | -0.864307 | N                        | -0.942406 | 1.790282  | -0.179013 |
| C                         | -3.485385 | 0.825217  | -1.140116 | N                          | -0.914003 | 1.769011  | 0.244269  | H                        | -0.742081 | 1.972004  | 1.881753  |
| C                         | -2.363457 | 0.672018  | -0.324488 | H                          | -0.200857 | 2.489483  | 2.059311  | H                        | -2.009699 | 4.055713  | 2.059255  |
| C                         | -2.213056 | -0.498614 | 0.435873  | H                          | -1.161863 | 4.722885  | 1.821775  | H                        | -2.581665 | 3.861931  | -2.252639 |
| C                         | -3.192578 | -1.502569 | 0.375736  | H                          | -2.779459 | 3.418882  | -2.005212 | H                        | -1.287919 | 1.787131  | -2.228813 |
| C                         | -4.297443 | -1.351492 | -0.458121 | H                          | -1.746383 | 1.243529  | -1.586861 | N                        | -3.174207 | 5.322155  | -0.041770 |
| C                         | -4.446821 | -0.185029 | -1.214790 | N                          | -2.627861 | 5.539444  | -0.313821 | C                        | -3.757331 | 5.875003  | -1.264266 |
| H                         | -3.606893 | 1.737193  | -1.717005 | C                          | -3.418942 | 5.824378  | -1.511063 | H                        | -4.490722 | 5.188640  | -1.703946 |
| H                         | -1.627105 | 1.471439  | -0.272916 | H                          | -4.314777 | 5.194146  | -1.557982 | H                        | -4.261569 | 6.809872  | -1.024000 |
| H                         | -3.075252 | -2.396051 | 0.980226  | H                          | -3.733430 | 6.866748  | -1.487862 | H                        | -2.983647 | 6.083853  | -2.010648 |
| H                         | -5.044986 | -2.137203 | -0.512586 | H                          | -2.830527 | 5.663039  | -2.420886 | C                        | -3.454424 | 5.970810  | 1.239696  |
| H                         | -5.313493 | -0.062922 | -1.858004 | C                          | -2.477357 | 6.576412  | 0.707511  | H                        | -2.528358 | 6.266356  | 1.744949  |
| C                         | -1.093263 | -0.681171 | 1.404688  | H                          | -1.421027 | 6.808233  | 0.883357  | H                        | -4.046771 | 6.866421  | 1.059182  |
| O                         | -1.234962 | -1.211445 | 2.485690  | H                          | -2.974457 | 7.483149  | 0.366961  | H                        | -4.020662 | 5.309499  | 1.905963  |
| N                         | 0.102106  | 3.188627  | -0.719701 |                            |           |           |           |                          |           |           |           |
| N                         | 0.348947  | 3.893842  | 0.207044  |                            |           |           |           |                          |           |           |           |
| N                         | 0.595345  | 4.606945  | 1.117710  |                            |           |           |           |                          |           |           |           |
|                           |           |           |           | <b>M<sub>1RA</sub>-TS6</b> |           |           |           | <b>M<sub>1RA</sub>-9</b> |           |           |           |
| <b>M<sub>1RA</sub>-8</b>  |           |           |           | C                          | 1.981963  | -1.931273 | -0.119237 | C                        | -1.004762 | -2.173177 | 0.259272  |
| C                         | 1.987801  | -1.775924 | 1.108315  | O                          | 2.561906  | -2.975818 | -0.359557 | O                        | -1.767815 | -3.120118 | 0.228712  |
| O                         | 2.604262  | -2.797674 | 1.346384  | N                          | -1.753934 | -2.724479 | 1.457554  | O                        | 0.320359  | -2.293934 | 0.665829  |
| N                         | -2.255914 | -2.633474 | 1.850071  | N                          | -0.488209 | -1.845243 | 2.233418  | C                        | -2.747041 | 1.531462  | -0.623054 |
| N                         | -1.678148 | -1.915957 | 2.693768  | N                          | 0.256378  | -1.814024 | 3.054322  | O                        | -1.577561 | 1.807933  | -0.634113 |
| N                         | -1.193988 | -1.372557 | 3.557059  | O                          | 2.610764  | -0.870019 | 0.524762  | O                        | -1.277117 | -0.946951 | -0.052755 |
| O                         | 2.621586  | -0.555879 | 0.892174  | C                          | 4.002543  | -0.975193 | 0.756009  | N                        | -3.890953 | 1.243659  | -0.719677 |
| C                         | 4.037252  | -0.546574 | 0.842165  | C                          | 4.770162  | 0.046754  | -0.098563 | Cu                       | 0.005804  | 0.422404  | 0.029325  |
| C                         | 4.521438  | -0.148726 | -0.561144 | H                          | 4.354503  | -1.978505 | 0.508608  | C                        | 1.884813  | 2.251071  | -1.128553 |
| H                         | 4.430636  | -1.535540 | 1.085355  | H                          | 4.201471  | -0.755024 | 1.807808  | C                        | 2.867596  | 3.210897  | -1.186401 |
| H                         | 4.411701  | 0.190976  | 1.556648  | Cl                         | 6.523824  | -0.118218 | 0.287021  | C                        | 3.404434  | 3.752855  | 0.018584  |
| Cl                        | 6.323699  | -0.139983 | -0.539709 | Cl                         | 4.512837  | -0.260641 | -1.855535 | C                        | 2.850054  | 3.252235  | 1.233729  |
| Cl                        | 3.941979  | -1.325221 | -1.796644 | Cl                         | 4.238876  | 1.729493  | 0.281071  | C                        | 1.867274  | 2.290394  | 1.195869  |
| Cl                        | 3.930125  | 1.497349  | -1.005700 | C                          | -4.497769 | -3.073843 | 0.719323  | N                        | 1.389894  | 1.771814  | 0.038693  |
| C                         | -3.771628 | -4.157030 | 0.097600  | C                          | -3.285759 | -3.027730 | 0.011551  | H                        | 1.468667  | 1.829212  | -2.037923 |
| C                         | -3.136983 | -2.986499 | -0.358125 | C                          | -3.066544 | -3.837065 | -1.117864 | H                        | 3.216675  | 3.535549  | -2.157213 |
| C                         | -3.237949 | -2.611624 | -1.711001 | C                          | -4.095824 | -4.657133 | -1.565659 | H                        | 3.189082  | 3.607981  | 2.197151  |
| C                         | -3.964433 | -3.401250 | -2.595296 | C                          | -5.317580 | -4.689916 | -0.878851 | H                        | 1.438943  | 1.898317  | 2.112704  |

|                             |           |           |           |                            |           |           |           |                             |           |           |           |
|-----------------------------|-----------|-----------|-----------|----------------------------|-----------|-----------|-----------|-----------------------------|-----------|-----------|-----------|
| N                           | 4.377715  | 4.689124  | 0.009097  | H                          | 5.644866  | 5.987836  | 1.041733  | C                           | 3.389863  | -2.576423 | -0.379349 |
| C                           | 4.871363  | 5.255055  | 1.265225  | H                          | 4.068743  | 5.756715  | 1.817532  | C                           | 3.734829  | -2.371585 | 0.964573  |
| H                           | 5.304469  | 4.478473  | 1.905352  | C                          | 4.915921  | 5.184898  | -1.258320 | C                           | 4.333198  | -3.040355 | -1.303076 |
| H                           | 5.644866  | 5.987836  | 1.041733  | H                          | 4.152979  | 5.720154  | -1.835630 | C                           | 5.039338  | -2.636613 | 1.376550  |
| H                           | 4.068743  | 5.756715  | 1.817532  | H                          | 5.736133  | 5.869793  | -1.049311 | H                           | 2.987964  | -2.003591 | 1.660546  |
| C                           | 4.915921  | 5.184898  | -1.258320 | H                          | 5.303667  | 4.362436  | -1.868685 | C                           | 5.633921  | -3.302660 | -0.873334 |
| H                           | 4.152979  | 5.720154  | -1.835630 | C                          | -5.213318 | 1.222243  | -0.279453 | H                           | 4.041873  | -3.188674 | -2.337642 |
| H                           | 5.736133  | 5.869793  | -1.049311 | C                          | -6.161973 | 0.524692  | -1.036464 | C                           | 5.990264  | -3.102117 | 0.462786  |
| H                           | 5.303667  | 4.362436  | -1.868685 | C                          | -5.574316 | 1.893625  | 0.897904  | H                           | 5.312507  | -2.477199 | 2.415485  |
| C                           | -5.213318 | 1.222243  | -0.279453 | C                          | -7.487320 | 0.499537  | -0.604332 | H                           | 6.369241  | -3.663389 | -1.586150 |
| C                           | -6.161973 | 0.524692  | -1.036464 | H                          | -5.854881 | 0.014341  | -1.943237 | H                           | 7.004949  | -3.305989 | 0.791345  |
| C                           | -5.574316 | 1.893625  | 0.897904  | C                          | -6.903435 | 1.859590  | 1.313390  | C                           | 1.533833  | 1.724446  | 1.176562  |
| C                           | -7.487320 | 0.499537  | -0.604332 | H                          | -4.819273 | 2.428786  | 1.464938  | C                           | 2.119527  | 2.585629  | 0.023564  |
| H                           | -5.854881 | 0.014341  | -1.943237 | C                          | -7.860741 | 1.164829  | 0.566648  | Cl                          | 2.757720  | 4.127695  | 0.719667  |
| C                           | -6.903435 | 1.859590  | 1.313390  | H                          | -8.228492 | -0.040695 | -1.185289 | Cl                          | 0.846151  | 2.983019  | -1.201158 |
| H                           | -4.819273 | 2.428786  | 1.464938  | H                          | -7.191067 | 2.378251  | 2.222911  | Cl                          | 3.459827  | 1.711166  | -0.803806 |
| C                           | -7.860741 | 1.164829  | 0.566648  | H                          | -8.894753 | 1.143192  | 0.897120  | H                           | 0.758280  | 2.346362  | 1.655995  |
| H                           | -8.228492 | -0.040695 | -1.185289 | C                          | 0.781189  | -3.582803 | 1.033924  | H                           | 2.350256  | 1.606711  | 1.906252  |
| H                           | -7.191067 | 2.378251  | 2.222911  | H                          | 1.171591  | -3.541251 | 2.054027  |                             |           |           |           |
| H                           | -8.894753 | 1.143192  | 0.897120  | H                          | -0.034101 | -4.306465 | 0.974093  | <b>M<sub>IRA'</sub>-TS8</b> |           |           |           |
| C                           | 0.781189  | -3.582803 | 1.033924  | C                          | 1.916942  | -4.031656 | 0.102627  | O                           | -1.068014 | 0.050386  | -0.494610 |
| H                           | 1.171591  | -3.541251 | 2.054027  | Cl                         | 3.310384  | -2.888538 | 0.190656  | C                           | -1.057866 | -1.531553 | 0.381434  |
| H                           | -0.034101 | -4.306465 | 0.974093  | Cl                         | 2.458540  | -5.662999 | 0.645708  | O                           | 0.166083  | -1.655201 | 0.457577  |
| C                           | 1.916942  | -4.031656 | 0.102627  | Cl                         | 1.348655  | -4.125785 | -1.603566 | N                           | -2.126318 | -2.033219 | 0.718605  |
| Cl                          | 3.310384  | -2.888538 | 0.190656  |                            |           |           |           | Cu                          | 0.869131  | 0.107246  | -0.497076 |
| Cl                          | 2.458540  | -5.662999 | 0.645708  | <b>M<sub>IRA'</sub>-10</b> |           |           |           | C                           | 3.368587  | -1.321810 | -0.134162 |
| Cl                          | 1.348655  | -4.125785 | -1.603566 | O                          | 1.070608  | 0.499034  | 0.757820  | C                           | 4.724211  | -1.503537 | 0.014739  |
|                             |           |           |           | C                          | 0.975420  | -1.972861 | -0.607590 | C                           | 5.599293  | -0.378937 | 0.010176  |
| <b>M<sub>IRA'</sub>-TS7</b> |           |           |           | O                          | -0.181899 | -1.673224 | -0.521267 | C                           | 4.980083  | 0.893733  | -0.159275 |
| C                           | -1.004762 | -2.173177 | 0.259272  | N                          | 2.092908  | -2.311801 | -0.823195 | C                           | 3.613582  | 0.980048  | -0.301506 |
| O                           | -1.767815 | -3.120118 | 0.228712  | Cu                         | -0.732650 | 0.263168  | 0.534886  | N                           | 2.799920  | -0.102837 | -0.293568 |
| O                           | 0.320359  | -2.293934 | 0.665829  | C                          | -3.393413 | -0.573435 | 1.319630  | H                           | 2.694812  | -2.171778 | -0.126492 |
| C                           | -2.747041 | 1.531462  | -0.623054 | C                          | -4.736387 | -0.850085 | 1.198947  | H                           | 5.099611  | -2.510633 | 0.136597  |
| O                           | -1.577561 | 1.807933  | -0.634113 | C                          | -5.424263 | -0.523627 | -0.005699 | H                           | 5.560031  | 1.806681  | -0.179315 |
| O                           | -1.277117 | -0.946951 | -0.052755 | C                          | -4.641059 | 0.094029  | -1.023710 | H                           | 3.131866  | 1.944363  | -0.429176 |
| N                           | -3.890953 | 1.243659  | -0.719677 | C                          | -3.302048 | 0.331797  | -0.812177 | N                           | 6.936219  | -0.512719 | 0.160278  |
| Cu                          | 0.005804  | 0.422404  | 0.029325  | N                          | -2.664261 | 0.013401  | 0.340062  | C                           | 7.799689  | 0.667802  | 0.172395  |
| C                           | 1.884813  | 2.251071  | -1.128553 | H                          | -2.859383 | -0.825807 | 2.230371  | H                           | 7.532951  | 1.348148  | 0.989257  |
| C                           | 2.867596  | 3.210897  | -1.186401 | H                          | -5.243423 | -1.322020 | 2.029920  | H                           | 8.831132  | 0.349396  | 0.315831  |
| C                           | 3.404434  | 3.752855  | 0.018584  | H                          | -5.074012 | 0.380588  | -1.972604 | H                           | 7.736823  | 1.216708  | -0.774151 |
| C                           | 2.850054  | 3.252235  | 1.233729  | H                          | -2.696504 | 0.794452  | -1.585185 | C                           | 7.530304  | -1.838668 | 0.331443  |
| C                           | 1.867274  | 2.290394  | 1.195869  | N                          | -6.739420 | -0.788766 | -0.176005 | H                           | 7.309948  | -2.485435 | -0.525245 |
| N                           | 1.389894  | 1.771814  | 0.038693  | C                          | -7.393284 | -0.485970 | -1.448911 | H                           | 8.611387  | -1.734116 | 0.410678  |
| H                           | 1.468667  | 1.829212  | -2.037923 | H                          | -6.928542 | -1.033827 | -2.276945 | H                           | 7.161827  | -2.326961 | 1.241029  |
| H                           | 3.216675  | 3.535549  | -2.157213 | H                          | -8.439680 | -0.781291 | -1.387917 | C                           | -3.441086 | -2.133031 | 0.284049  |
| H                           | 3.189082  | 3.607981  | 2.197151  | H                          | -7.350253 | 0.585842  | -1.672527 | C                           | -3.755339 | -2.267248 | -1.082699 |
| H                           | 1.438943  | 1.898317  | 2.112704  | C                          | -7.503978 | -1.444990 | 0.883981  | C                           | -4.466709 | -2.168739 | 1.244758  |
| N                           | 4.377715  | 4.689124  | 0.009097  | H                          | -7.464806 | -0.868339 | 1.814378  | C                           | -5.085401 | -2.402771 | -1.474059 |
| C                           | 4.871363  | 5.255055  | 1.265225  | H                          | -8.545474 | -1.519522 | 0.574448  | H                           | -2.955616 | -2.266152 | -1.817279 |
| H                           | 5.304469  | 4.478473  | 1.905352  | H                          | -7.127849 | -2.455534 | 1.083651  | C                           | -5.792134 | -2.303814 | 0.837977  |

|                           |           |           |           |                            |           |           |           |                          |           |           |           |
|---------------------------|-----------|-----------|-----------|----------------------------|-----------|-----------|-----------|--------------------------|-----------|-----------|-----------|
| H                         | -4.209522 | -2.082029 | 2.295574  | C                          | 1.992493  | 3.061051  | 0.011899  | H                        | -6.051170 | -4.271427 | 0.691009  |
| C                         | -6.108228 | -2.419332 | -0.519621 | Cl                         | 3.272425  | 4.311428  | 0.218978  | C                        | -6.452478 | -1.582338 | -1.070525 |
| H                         | -5.323454 | -2.498792 | -2.529490 | Cl                         | 0.694195  | 3.330909  | 1.230447  | H                        | -6.221353 | -1.859302 | -2.104910 |
| H                         | -6.581015 | -2.320442 | 1.584378  | Cl                         | 1.288962  | 3.191196  | -1.639963 | H                        | -7.505261 | -1.788858 | -0.886437 |
| H                         | -7.142791 | -2.526281 | -0.831497 | H                          | 3.082416  | 1.649492  | 1.217815  | H                        | -6.285142 | -0.506372 | -0.950541 |
| C                         | -2.115555 | 0.881337  | -0.890760 | H                          | 3.451948  | 1.571274  | -0.529119 |                          |           |           |           |
| C                         | -2.339357 | 2.086548  | 0.052394  |                            |           |           |           | <b>M<sub>2RA</sub>-8</b> |           |           |           |
| Cl                        | -3.796402 | 2.981171  | -0.526747 | <b>M<sub>2RA</sub>-TS6</b> |           |           |           | C                        | -0.166732 | 1.350832  | 1.557611  |
| Cl                        | -0.920652 | 3.207282  | 0.017565  | C                          | -0.011237 | 0.722230  | 1.874746  | C                        | -0.212067 | 2.026033  | 0.336657  |
| Cl                        | -2.603690 | 1.545910  | 1.747803  | C                          | -0.310631 | 1.571451  | 0.808663  | C                        | -0.550262 | 3.384153  | 0.312821  |
| H                         | -1.935999 | 1.287036  | -1.894021 | C                          | -0.958404 | 2.788163  | 1.064383  | C                        | -0.838722 | 4.065625  | 1.504960  |
| H                         | -3.051896 | 0.315748  | -0.912651 | C                          | -1.352573 | 3.136754  | 2.365176  | C                        | -0.787823 | 3.378781  | 2.716608  |
|                           |           |           |           | C                          | -1.045196 | 2.282607  | 3.421763  | C                        | -0.452655 | 2.021743  | 2.749059  |
| <b>M<sub>1RA</sub>-11</b> |           |           |           | C                          | -0.375640 | 1.078109  | 3.176684  | H                        | 0.097043  | 0.297695  | 1.565383  |
| O                         | 1.651140  | 0.690993  | 0.051535  | H                          | 0.494379  | -0.217997 | 1.678373  | H                        | 0.008762  | 1.505202  | -0.590083 |
| C                         | 2.013865  | -0.571497 | -0.226866 | H                          | -0.037989 | 1.291790  | -0.205109 | H                        | -1.098618 | 5.119531  | 1.472932  |
| O                         | 1.102452  | -1.410370 | -0.378404 | H                          | -1.879167 | 4.069642  | 2.542402  | H                        | -1.010979 | 3.908655  | 3.638175  |
| N                         | 3.324877  | -0.805386 | -0.442512 | H                          | -1.333836 | 2.549819  | 4.433785  | H                        | -0.414821 | 1.492950  | 3.696746  |
| Cu                        | -0.793278 | -1.135174 | -0.250188 | H                          | -0.146857 | 0.411727  | 4.003320  | C                        | -0.832239 | 5.119027  | -1.399565 |
| C                         | -3.563369 | -1.622740 | -0.904656 | C                          | -1.135591 | 3.818594  | -0.075983 | O                        | -1.039217 | 6.118650  | -1.993188 |
| C                         | -4.935413 | -1.495494 | -0.855267 | O                          | -0.389276 | 4.749822  | -0.346855 | N                        | -0.591838 | 4.033815  | -0.929027 |
| C                         | -5.533747 | -0.591701 | 0.066732  | N                          | -2.269827 | 3.325186  | -0.527527 | C                        | 1.105288  | -1.220254 | -1.080207 |
| C                         | -4.631618 | 0.135164  | 0.892894  | N                          | -2.724299 | 4.312421  | -1.878668 | O                        | 0.722457  | -1.811498 | -0.030502 |
| C                         | -3.272385 | -0.061242 | 0.769298  | N                          | -3.434322 | 4.551253  | -2.696056 | O                        | 2.479940  | -1.333302 | -1.409267 |
| N                         | -2.712582 | -0.925582 | -0.112193 | C                          | 1.426533  | -1.060520 | -1.213767 | C                        | 3.320566  | -2.040298 | -0.534574 |
| H                         | -3.107185 | -2.311319 | -1.608234 | O                          | 1.149155  | -1.894537 | -0.305561 | C                        | 4.447707  | -1.131842 | -0.018300 |
| H                         | -5.534674 | -2.093633 | -1.528840 | O                          | 2.793366  | -0.938826 | -1.571687 | H                        | 3.794629  | -2.873655 | -1.065275 |
| H                         | -4.986201 | 0.848284  | 1.625205  | C                          | 3.740057  | -1.697239 | -0.864038 | H                        | 2.764389  | -2.420616 | 0.324733  |
| H                         | -2.584507 | 0.493416  | 1.398858  | C                          | 4.762700  | -0.779119 | -0.175663 | Cl                       | 5.440081  | -0.488767 | -1.384926 |
| N                         | -6.877696 | -0.433906 | 0.152033  | H                          | 4.297869  | -2.337091 | -1.556918 | Cl                       | 3.781089  | 0.258768  | 0.915215  |
| C                         | -7.449826 | 0.515691  | 1.104009  | H                          | 3.260428  | -2.313138 | -0.100563 | Cl                       | 5.513283  | -2.117931 | 1.062015  |
| H                         | -7.116629 | 1.540154  | 0.898981  | Cl                         | 5.620853  | 0.254583  | -1.384193 | O                        | 0.459714  | -0.561301 | -1.903979 |
| H                         | -8.535834 | 0.487588  | 1.023229  | Cl                         | 3.961746  | 0.291251  | 1.034153  | H                        | -0.878272 | -1.780342 | 0.009949  |
| H                         | -7.176485 | 0.262063  | 2.134944  | Cl                         | 5.977836  | -1.822257 | 0.667116  | C                        | -2.570712 | -1.141502 | -1.030026 |
| C                         | -7.765362 | -1.196459 | -0.723271 | O                          | 0.682025  | -0.327977 | -1.876569 | C                        | -3.939373 | -1.102376 | -1.112666 |
| H                         | -7.640761 | -2.275582 | -0.575755 | H                          | -0.450603 | -2.013912 | -0.216906 | C                        | -4.735924 | -1.732363 | -0.108869 |
| H                         | -8.797732 | -0.937973 | -0.492069 | C                          | -2.244899 | -1.366445 | -1.065684 | C                        | -4.029158 | -2.381912 | 0.949081  |
| H                         | -7.581473 | -0.967661 | -1.779877 | C                          | -3.615110 | -1.430042 | -1.076004 | C                        | -2.657664 | -2.376236 | 0.963603  |
| C                         | 3.961245  | -1.928521 | -0.075347 | C                          | -4.300572 | -2.268436 | -0.145116 | N                        | -1.942807 | -1.766118 | -0.007695 |
| C                         | 3.462582  | -2.865998 | 0.892289  | C                          | -3.484771 | -3.013526 | 0.760488  | H                        | -1.911613 | -0.687472 | -1.760992 |
| C                         | 5.249280  | -2.162385 | -0.662403 | C                          | -2.119077 | -2.897824 | 0.708272  | H                        | -4.391037 | -0.594711 | -1.953458 |
| C                         | 4.212066  | -3.976180 | 1.221415  | N                          | -1.511666 | -2.087659 | -0.187052 | H                        | -4.551802 | -2.881311 | 1.752579  |
| H                         | 2.501764  | -2.688527 | 1.361783  | H                          | -1.668077 | -0.746567 | -1.742127 | H                        | -2.087375 | -2.856304 | 1.750212  |
| C                         | 5.978193  | -3.283333 | -0.322847 | H                          | -4.154084 | -0.833539 | -1.798819 | N                        | -6.083910 | -1.716505 | -0.156983 |
| H                         | 5.618897  | -1.439378 | -1.382067 | H                          | -3.918784 | -3.676191 | 1.495942  | C                        | -6.871122 | -2.416484 | 0.859372  |
| C                         | 5.466478  | -4.196718 | 0.618031  | H                          | -1.467389 | -3.445977 | 1.378631  | H                        | -6.736084 | -1.967388 | 1.850002  |
| H                         | 3.836474  | -4.683711 | 1.953847  | N                          | -5.646599 | -2.352047 | -0.121616 | H                        | -7.924831 | -2.353976 | 0.593052  |
| H                         | 6.947090  | -3.461511 | -0.778097 | C                          | -6.319273 | -3.220205 | 0.845894  | H                        | -6.593461 | -3.474314 | 0.913290  |
| H                         | 6.044733  | -5.075446 | 0.886347  | H                          | -6.062576 | -2.940605 | 1.873324  | C                        | -6.779048 | -1.005606 | -1.231515 |
| C                         | 2.660084  | 1.697291  | 0.210970  | H                          | -7.395956 | -3.118025 | 0.721346  | H                        | -6.586608 | -1.467973 | -2.206504 |

|                            |           |           |           |                            |           |           |           |                          |           |           |           |
|----------------------------|-----------|-----------|-----------|----------------------------|-----------|-----------|-----------|--------------------------|-----------|-----------|-----------|
| H                          | -7.850138 | -1.037313 | -1.038891 | <b>M2<sub>RA</sub>-9</b>   | Cl        | -4.431163 | -1.416506 | -0.898249                |           |           |           |
| H                          | -6.468521 | 0.043466  | -1.273900 | O                          | 1.261645  | -0.694959 | -0.829420 | Cl                       | -2.117077 | -3.216524 | -0.987310 |
|                            |           |           |           | C                          | 1.933993  | -1.890937 | -1.120813 | Cl                       | -4.225832 | -3.643830 | 1.016677  |
| <b>M2<sub>RA</sub>-TS7</b> |           |           |           | C                          | 1.729777  | -2.926206 | -0.000964 | C                        | -0.338652 | 5.068503  | -0.741797 |
| C                          | -0.876409 | -1.289738 | 2.645712  | H                          | 3.006640  | -1.715577 | -1.234161 | C                        | -0.366412 | 3.678052  | -0.682591 |
| O                          | -0.877855 | -2.421641 | 3.062839  | H                          | 1.529234  | -2.324519 | -2.041260 | C                        | -1.389816 | 2.992989  | 0.010964  |
| O                          | -1.225907 | -1.284428 | 0.935175  | Cl                         | 2.369797  | -2.317826 | 1.570906  | C                        | -2.385551 | 3.768016  | 0.645166  |
| C                          | -1.551266 | -2.531609 | 0.409494  | Cl                         | -0.021179 | -3.324044 | 0.203732  | C                        | -2.344809 | 5.162188  | 0.578674  |
| C                          | -0.630314 | -2.926760 | -0.759928 | Cl                         | 2.618733  | -4.432687 | -0.462374 | C                        | -1.328724 | 5.827499  | -0.110330 |
| H                          | -2.581793 | -2.549373 | 0.032348  | C                          | 1.179920  | 5.034355  | 0.645007  | H                        | 0.464538  | 5.561313  | -1.283851 |
| H                          | -1.447239 | -3.304258 | 1.178606  | C                          | 0.812345  | 3.715194  | 0.394152  | H                        | 0.408063  | 3.096888  | -1.172453 |
| Cl                         | -0.787847 | -1.769363 | -2.139613 | C                          | 1.751107  | 2.755889  | -0.054760 | H                        | -3.179069 | 3.269347  | 1.183818  |
| Cl                         | 1.096807  | -2.975280 | -0.240008 | C                          | 3.084332  | 3.193991  | -0.239017 | H                        | -3.125145 | 5.733577  | 1.075835  |
| Cl                         | -1.115879 | -4.576439 | -1.333445 | C                          | 3.440609  | 4.519848  | 0.015237  | H                        | -1.307591 | 6.912504  | -0.154413 |
| O                          | -0.718910 | -0.133381 | 2.960511  | C                          | 2.501152  | 5.453312  | 0.458124  | C                        | -2.147375 | 0.812000  | 0.712173  |
| C                          | -2.157792 | 4.730871  | -0.333203 | H                          | 0.427696  | 5.739510  | 0.990176  | O                        | -3.062439 | 1.092918  | 1.484310  |
| C                          | -1.646904 | 3.480000  | 0.011454  | H                          | -0.218283 | 3.407671  | 0.546110  | N                        | -1.328389 | 1.592484  | -0.006202 |
| C                          | -2.463013 | 2.338773  | -0.042624 | H                          | 3.827528  | 2.485610  | -0.577896 | H                        | -0.463271 | 1.045744  | -0.789000 |
| C                          | -3.801165 | 2.476363  | -0.450308 | H                          | 4.473951  | 4.823504  | -0.137331 | C                        | 3.462550  | 0.915999  | -0.050438 |
| C                          | -4.302428 | 3.732109  | -0.794192 | H                          | 2.789902  | 6.481951  | 0.653888  | C                        | 4.724181  | 0.579300  | 0.380760  |
| C                          | -3.487718 | 4.865666  | -0.739020 | C                          | 2.068771  | 0.453304  | -0.622124 | C                        | 5.252502  | -0.713831 | 0.093214  |
| H                          | -1.511388 | 5.602629  | -0.282743 | O                          | 3.289235  | 0.373398  | -0.773857 | C                        | 4.407145  | -1.590193 | -0.649284 |
| H                          | -0.615411 | 3.379048  | 0.332859  | N                          | 1.265130  | 1.464871  | -0.286763 | C                        | 3.158749  | -1.168235 | -1.040035 |
| H                          | -4.447156 | 1.606304  | -0.500220 | H                          | -0.231979 | 1.146319  | -0.201490 | N                        | 2.686636  | 0.061824  | -0.749479 |
| H                          | -5.338712 | 3.820825  | -1.108557 | C                          | -2.114375 | 1.096971  | -1.229613 | H                        | 3.034384  | 1.891070  | 0.156744  |
| H                          | -3.883917 | 5.840086  | -1.008537 | C                          | -3.457133 | 0.807265  | -1.213451 | H                        | 5.295679  | 1.309905  | 0.936636  |
| C                          | -2.587989 | 0.083916  | 0.491742  | C                          | -4.058715 | 0.288260  | -0.028129 | H                        | 4.724392  | -2.589273 | -0.914670 |
| O                          | -3.619045 | -0.506684 | 0.543984  | C                          | -3.194724 | 0.104890  | 1.092747  | H                        | 2.491571  | -1.812091 | -1.603110 |
| N                          | -1.862262 | 1.096334  | 0.307050  | C                          | -1.862093 | 0.421826  | 0.989941  | N                        | 6.485166  | -1.089511 | 0.503024  |
| H                          | 0.019377  | 0.898748  | 0.481820  | N                          | -1.327755 | 0.910147  | -0.149097 | C                        | 6.995878  | -2.421669 | 0.180780  |
| C                          | 1.893078  | 0.747739  | 1.383847  | H                          | -1.623805 | 1.489699  | -2.113573 | H                        | 7.067328  | -2.571860 | -0.902592 |
| C                          | 3.249494  | 0.862995  | 1.226326  | H                          | -4.034874 | 0.976899  | -2.111429 | H                        | 7.991416  | -2.530964 | 0.607860  |
| C                          | 3.799380  | 1.234959  | -0.038955 | H                          | -3.565813 | -0.279780 | 2.032441  | H                        | 6.354063  | -3.205037 | 0.599378  |
| C                          | 2.864392  | 1.473508  | -1.092981 | H                          | -1.176696 | 0.293761  | 1.820483  | C                        | 7.328988  | -0.161459 | 1.255461  |
| C                          | 1.520633  | 1.339516  | -0.862344 | N                          | -5.374141 | -0.013123 | 0.030387  | H                        | 6.840586  | 0.154597  | 2.183885  |
| N                          | 1.046222  | 0.980717  | 0.353659  | C                          | -5.954611 | -0.552340 | 1.260360  | H                        | 8.261537  | -0.661268 | 1.513204  |
| H                          | 1.428050  | 0.466660  | 2.320186  | H                          | -5.870212 | 0.162185  | 2.087223  | H                        | 7.567088  | 0.731344  | 0.665835  |
| H                          | 3.883920  | 0.666372  | 2.079094  | H                          | -7.009996 | -0.759260 | 1.090849  | O                        | 0.362897  | 0.570731  | -1.532046 |
| H                          | 3.190201  | 1.760375  | -2.082811 | H                          | -5.463233 | -1.486335 | 1.554173  | H                        | 0.342839  | 1.054588  | -2.368904 |
| H                          | 0.779160  | 1.512753  | -1.632288 | C                          | -6.235396 | 0.205328  | -1.131740 | H                        | 1.622430  | 0.354709  | -1.107374 |
| N                          | 5.127650  | 1.355453  | -0.226679 | H                          | -5.914735 | -0.402890 | -1.985098 |                          |           |           |           |
| C                          | 5.660824  | 1.757514  | -1.530221 | H                          | -7.254743 | -0.076095 | -0.872756 | <b>M2<sub>RB</sub>-7</b> |           |           |           |
| H                          | 5.288063  | 2.745154  | -1.822863 | H                          | -6.234991 | 1.258350  | -1.434044 | C                        | 2.705626  | 1.051529  | -0.566597 |
| H                          | 6.746464  | 1.804814  | -1.466286 |                            |           |           |           | C                        | 4.101382  | 0.760875  | -0.120954 |
| H                          | 5.390365  | 1.035885  | -2.308610 | <b>M2<sub>RA</sub>-TS8</b> |           |           |           | O                        | 4.805984  | 1.467142  | 0.570043  |
| C                          | 6.058190  | 1.095492  | 0.873708  | O                          | -1.790865 | -0.527897 | 0.484755  | N                        | 4.541970  | -0.531933 | -0.598893 |
| H                          | 5.945973  | 0.074044  | 1.252602  | C                          | -2.566243 | -1.505489 | 1.130945  | N                        | 5.685506  | -0.855342 | -0.231846 |
| H                          | 7.076058  | 1.215168  | 0.507432  | C                          | -3.293621 | -2.390065 | 0.105408  | N                        | 6.716900  | -1.227425 | 0.055095  |
| H                          | 5.902112  | 1.796819  | 1.700778  | H                          | -3.312806 | -1.044342 | 1.781534  | C                        | -0.623602 | -0.160290 | 0.303843  |
|                            |           |           |           | H                          | -1.912167 | -2.155334 | 1.720660  | O                        | -0.727306 | 0.806462  | -0.459203 |

|                            |           |           |           |                                       |           |           |           |                                       |           |           |           |
|----------------------------|-----------|-----------|-----------|---------------------------------------|-----------|-----------|-----------|---------------------------------------|-----------|-----------|-----------|
| O                          | -1.873143 | -0.899825 | 0.616085  | O                                     | 1.200279  | -1.164471 | -0.304199 | O                                     | -1.207356 | 0.754336  | 0.877034  |
| C                          | -3.094650 | -0.423848 | 0.251282  | C                                     | 2.352097  | -0.455023 | -0.162380 | C                                     | 0.058514  | 0.238447  | 1.248859  |
| O                          | 0.337854  | -0.695994 | 0.874310  | O                                     | -1.028930 | -1.295311 | -0.466924 | C                                     | 0.996409  | -0.005119 | 0.046859  |
| H                          | 2.587555  | 0.824184  | -1.630147 | H                                     | -3.089291 | 0.808488  | 1.820286  | H                                     | -0.040153 | -0.684280 | 1.825073  |
| H                          | 1.991735  | 0.417274  | -0.015543 | H                                     | -2.779767 | -0.044854 | 0.290193  | H                                     | 0.512394  | 1.016059  | 1.868230  |
| H                          | 2.474204  | 2.100375  | -0.377154 | H                                     | -3.158391 | 1.698420  | 0.289710  | Cl                                    | 0.412082  | -1.338154 | -1.011412 |
| C                          | -3.479145 | 0.921592  | 0.382769  | C                                     | 2.528193  | 0.846442  | -0.662999 | Cl                                    | 1.151279  | 1.496972  | -0.936083 |
| C                          | -4.038358 | -1.362758 | -0.194998 | C                                     | 3.439733  | -1.107597 | 0.439425  | Cl                                    | 2.614650  | -0.451467 | 0.717526  |
| H                          | -3.732683 | -2.400822 | -0.290186 | H                                     | 3.294955  | -2.114433 | 0.820935  | <b>M<sub>3RA</sub>-TS<sub>2</sub></b> |           |           |           |
| H                          | -2.752791 | 1.650084  | 0.719971  | H                                     | 1.689518  | 1.354936  | -1.122232 | C                                     | 2.663545  | -0.037423 | 0.103420  |
| C                          | -5.341977 | -0.968476 | -0.499867 | C                                     | 4.680810  | -0.475923 | 0.535719  | O                                     | 3.003430  | 1.132199  | -0.037869 |
| C                          | -4.783128 | 1.306431  | 0.067796  | C                                     | 3.770786  | 1.471860  | -0.554778 | N                                     | 3.420332  | -1.008517 | 0.487048  |
| H                          | -6.059337 | -1.710876 | -0.840366 | H                                     | 5.512205  | -0.998621 | 1.001838  | O                                     | 1.425094  | -0.594674 | -0.148866 |
| C                          | -5.723207 | 0.370108  | -0.374333 | C                                     | 4.854556  | 0.820035  | 0.042813  | C                                     | 0.385034  | -0.327000 | 0.817256  |
| H                          | -5.067713 | 2.350412  | 0.174447  | H                                     | 3.893740  | 2.478535  | -0.946891 | C                                     | -0.913390 | -0.010989 | 0.060770  |
| H                          | -6.736359 | 0.679009  | -0.615039 | H                                     | 5.818595  | 1.314440  | 0.120537  | H                                     | 0.651592  | 0.522032  | 1.448991  |
| <b>M<sub>2RB</sub>-TS6</b> |           |           |           | <b>M<sub>3RA</sub>-1</b>              |           |           |           | H 0.236345 -1.222392 1.423496         |           |           |           |
| C                          | 2.658062  | 0.838761  | -0.469741 | C                                     | 1.990870  | -0.389095 | -0.089928 | Cl                                    | -0.727985 | 1.468458  | -0.941799 |
| C                          | 4.052578  | 0.481851  | 0.168635  | O                                     | 2.251056  | -1.570137 | -0.127768 | Cl                                    | -1.384253 | -1.390096 | -0.993299 |
| O                          | 4.330184  | 0.621297  | 1.353482  | N                                     | 2.906082  | 0.682329  | -0.005265 | Cl                                    | -2.185973 | 0.257653  | 1.307062  |
| N                          | 4.644378  | 0.062819  | -0.918749 | N                                     | 4.102183  | 0.324443  | 0.028842  | <b>M<sub>3RA</sub>-3</b>              |           |           |           |
| N                          | 6.292158  | -0.422762 | -0.365193 | N                                     | 5.215829  | 0.138089  | 0.067341  | C                                     | 0.011005  | -0.536579 | 1.255416  |
| N                          | 7.305258  | -0.827740 | -0.553164 | O                                     | 0.762295  | 0.152164  | -0.119905 | O                                     | 0.390143  | -1.489834 | 1.949430  |
| C                          | -0.699352 | -0.190764 | 0.364163  | C                                     | -0.311129 | -0.790591 | -0.208293 | N                                     | -1.036880 | 0.225062  | 1.555342  |
| O                          | -0.757273 | 0.756089  | -0.428281 | C                                     | -1.617720 | -0.021429 | -0.003940 | O                                     | 0.679465  | -0.230140 | 0.038967  |
| O                          | -1.973260 | -0.883651 | 0.673085  | H                                     | -0.218482 | -1.555968 | 0.564937  | C                                     | 1.814211  | -1.003723 | -0.243763 |
| C                          | -3.172552 | -0.404104 | 0.242776  | H                                     | -0.322173 | -1.263939 | -1.193325 | C                                     | 3.078556  | -0.130034 | -0.281404 |
| O                          | 0.234970  | -0.736583 | 0.970613  | Cl                                    | -1.654457 | 0.754647  | 1.620667  | H                                     | 1.709767  | -1.464067 | -1.232083 |
| H                          | 2.552034  | 0.628436  | -1.535760 | Cl                                    | -1.823184 | 1.243451  | -1.269393 | H                                     | 1.952089  | -1.779294 | 0.514855  |
| H                          | 1.915037  | 0.252906  | 0.090061  | Cl                                    | -2.963944 | -1.212429 | -0.128550 | Cl                                    | 2.936627  | 1.163856  | -1.536284 |
| H                          | 2.535666  | 1.912484  | -0.305099 | <b>M<sub>3RA</sub>-TS<sub>1</sub></b> |           |           |           | Cl                                    | 3.380815  | 0.648319  | 1.316422  |
| C                          | -3.536254 | 0.952227  | 0.294412  | C                                     | 2.009653  | 0.918519  | -0.024660 | Cl                                    | 4.484587  | -1.192871 | -0.699000 |
| C                          | -4.116690 | -1.348373 | -0.190852 | O                                     | 2.496859  | 1.914014  | -0.484542 | C                                     | -4.638448 | 0.649450  | 0.041957  |
| H                          | -3.827072 | -2.394851 | -0.222854 | N                                     | 2.259833  | -0.338174 | 0.304137  | C                                     | -3.271119 | 0.404153  | -0.141396 |
| H                          | -2.808951 | 1.684209  | 0.621675  | N                                     | 4.107471  | -0.544885 | -0.072047 | C                                     | -2.851094 | -0.854962 | -0.595429 |
| C                          | -5.400385 | -0.947921 | -0.564250 | N                                     | 5.042922  | -1.132118 | -0.117367 | C                                     | -3.789680 | -1.854309 | -0.850671 |
| C                          | -4.820142 | 1.342838  | -0.089202 | O                                     | 0.645485  | 0.754486  | 0.431221  | C                                     | -5.150357 | -1.614314 | -0.635541 |
| H                          | -6.118608 | -1.694255 | -0.894145 | C                                     | -0.314971 | 0.617309  | -0.627652 | C                                     | -5.573289 | -0.360948 | -0.186646 |
| C                          | -5.760451 | 0.401623  | -0.520104 | C                                     | -1.561507 | -0.076931 | -0.072363 | H                                     | -4.961044 | 1.632478  | 0.370677  |
| H                          | -5.088721 | 2.395540  | -0.045665 | H                                     | 0.091517  | 0.024081  | -1.450645 | H                                     | -1.796967 | -1.040475 | -0.768365 |
| H                          | -6.757792 | 0.715263  | -0.814691 | H                                     | -0.590437 | 1.612742  | -0.987467 | H                                     | -3.458884 | -2.823067 | -1.214165 |
| <b>M<sub>2RB</sub>-8</b>   |           |           |           | Cl                                    | -1.172625 | -1.737734 | 0.499972  | H                                     | -5.877233 | -2.399669 | -0.822586 |
| C                          | -3.374989 | 0.738994  | 0.768947  | Cl                                    | -2.259782 | 0.869639  | 1.291345  | H                                     | -6.629594 | -0.167088 | -0.023597 |
| C                          | -5.653154 | 0.138933  | -0.084496 | Cl                                    | -2.762325 | -0.169080 | -1.414278 | O                                     | -1.129611 | 1.360713  | 0.610572  |
| O                          | -6.597685 | -0.169233 | -0.736589 | <b>M<sub>3RA</sub>-2</b>              |           |           |           | C                                     | -2.317881 | 1.549852  | 0.025497  |
| N                          | -4.794973 | 0.456377  | 0.690497  | C                                     | -3.198200 | -0.062749 | 0.117456  | O                                     | -2.588234 | 2.665021  | -0.401416 |
| C                          | -0.130075 | -0.534013 | -0.085849 | O                                     | -4.266971 | -0.029290 | -0.365990 | <b>M<sub>3RA</sub>-TS<sub>3</sub></b> |           |           |           |
| O                          | -0.126726 | 0.584791  | 0.441929  | N                                     | -2.120593 | -0.311511 | 0.664110  | C                                     | 0.023983  | 0.679459  | -1.302918 |

|                           |           |           |           |                                        |           |           |           |                           |           |           |           |
|---------------------------|-----------|-----------|-----------|----------------------------------------|-----------|-----------|-----------|---------------------------|-----------|-----------|-----------|
| O                         | 0.494875  | 0.992696  | -2.432416 | O                                      | -3.717024 | 2.849716  | 0.581626  | N                         | 1.864777  | -0.696220 | -0.275149 |
| N                         | -1.216023 | 0.359062  | -1.489564 | <b>M<sub>3RA</sub>'-TS<sub>4</sub></b> |           |           |           | N                         | 3.531393  | 0.042289  | -0.649301 |
| O                         | 0.683789  | 0.721501  | -0.128789 | C                                      | -0.427977 | -1.303154 | -0.741275 | N                         | 4.439591  | 0.035669  | -1.281915 |
| C                         | 2.026532  | 1.200138  | -0.179209 | O                                      | 0.129758  | -2.172222 | -1.412904 | O                         | 0.219777  | -0.816968 | 0.836121  |
| C                         | 3.010394  | 0.092084  | 0.224837  | N                                      | -1.741655 | -1.029536 | -0.846920 | C                         | -0.975183 | -0.329882 | 0.311447  |
| H                         | 2.117048  | 2.021101  | 0.535077  | O                                      | 0.314404  | -0.579422 | 0.216668  | C                         | -1.965544 | -1.289973 | 0.092501  |
| H                         | 2.281653  | 1.551479  | -1.181085 | C                                      | 1.599520  | -1.081057 | 0.509334  | C                         | -1.195369 | 1.025489  | 0.055826  |
| Cl                        | 2.645973  | -0.515449 | 1.881061  | C                                      | 2.706555  | -0.059050 | 0.212945  | H                         | -1.752559 | -2.333817 | 0.297777  |
| Cl                        | 2.947298  | -1.283331 | -0.933260 | H                                      | 1.799813  | -1.975569 | -0.084269 | H                         | -0.420249 | 1.760517  | 0.239378  |
| Cl                        | 4.665406  | 0.813873  | 0.209677  | H                                      | 1.656717  | -1.317427 | 1.576792  | C                         | -3.209852 | -0.878573 | -0.381500 |
| C                         | -4.582793 | -0.282419 | -0.003004 | Cl                                     | 2.752440  | 0.384043  | -1.529296 | C                         | -2.444073 | 1.416222  | -0.429059 |
| C                         | -3.232272 | -0.498298 | 0.292577  | Cl                                     | 2.501589  | 1.436290  | 1.199824  | H                         | -3.988286 | -1.616627 | -0.548544 |
| C                         | -2.456728 | 0.583983  | 0.754155  | Cl                                     | 4.284216  | -0.836402 | 0.663256  | C                         | -3.451456 | 0.472615  | -0.646806 |
| C                         | -3.022852 | 1.860361  | 0.895826  | C                                      | -2.417547 | -0.503051 | 1.059951  | H                         | -4.419944 | 0.789021  | -1.021341 |
| C                         | -4.359849 | 2.066918  | 0.566625  | C                                      | -2.353467 | 0.198465  | -0.216108 | H                         | -2.628119 | 2.466983  | -0.630896 |
| C                         | -5.140938 | 0.990195  | 0.117969  | C                                      | -3.683962 | 0.457209  | -0.828704 | <b>M<sub>3RB</sub>'-2</b> |           |           |           |
| H                         | -5.174831 | -1.126019 | -0.343196 | C                                      | -4.841494 | 0.052275  | -0.248944 | C                         | -3.066525 | 0.089667  | 0.000187  |
| H                         | -1.438877 | 0.391091  | 1.069887  | C                                      | -4.808353 | -0.713845 | 0.965329  | O                         | -4.239080 | 0.053010  | -0.001340 |
| H                         | -2.417789 | 2.683093  | 1.267357  | C                                      | -3.620676 | -1.007051 | 1.596410  | N                         | -1.861778 | 0.349140  | 0.003089  |
| H                         | -4.803097 | 3.053718  | 0.667122  | H                                      | -1.485841 | -0.629729 | 1.595605  | O                         | -0.941644 | -0.718306 | -0.000807 |
| H                         | -6.185380 | 1.151948  | -0.136079 | H                                      | -3.685847 | 1.008905  | -1.764450 | C                         | 0.374281  | -0.273127 | -0.000166 |
| O                         | -1.335417 | -1.925335 | 0.188665  | H                                      | -5.802062 | 0.282281  | -0.699919 | C                         | 1.320131  | -1.302130 | 0.000181  |
| C                         | -2.593958 | -1.880092 | 0.101628  | H                                      | -5.745661 | -1.068877 | 1.385426  | C                         | 0.753129  | 1.066622  | -0.000430 |
| O                         | -3.379895 | -2.835163 | -0.119981 | H                                      | -3.606312 | -1.599249 | 2.505839  | H                         | 0.989724  | -2.335779 | 0.000513  |
| <b>M<sub>3RA</sub>'-4</b> |           |           |           | O                                      | -1.097941 | 1.766916  | -1.502474 | H                         | 0.005174  | 1.850078  | -0.000510 |
| C                         | -0.026445 | -1.384017 | -0.591363 | C                                      | -1.512997 | 1.563387  | -0.343847 | C                         | 2.673975  | -0.972611 | 0.000086  |
| O                         | 0.440704  | -2.481771 | -0.824478 | O                                      | -1.462095 | 2.254079  | 0.692276  | C                         | 2.117309  | 1.375326  | -0.000355 |
| N                         | -1.287416 | -1.128768 | -0.106688 | <b>M<sub>3RB</sub>'-1</b>              |           |           |           | H                         | 3.412708  | -1.768740 | 0.000322  |
| O                         | 0.676052  | -0.210468 | -0.694184 | C                                      | 1.358249  | -0.006548 | 0.013455  | C                         | 3.080105  | 0.365865  | -0.000190 |
| C                         | 2.044835  | -0.305564 | -1.057141 | O                                      | 1.272713  | 0.784695  | 0.922262  | H                         | 4.136253  | 0.616742  | -0.000180 |
| C                         | 2.932668  | 0.212925  | 0.083872  | N                                      | 2.553355  | -0.513642 | -0.552762 | H                         | 2.419933  | 2.418421  | -0.000479 |
| H                         | 2.213013  | 0.322813  | -1.934844 | N                                      | 3.591567  | -0.070320 | -0.020414 |                           |           |           |           |
| H                         | 2.317433  | -1.339044 | -1.278110 | N                                      | 4.601477  | 0.253281  | 0.370756  |                           |           |           |           |
| Cl                        | 2.530013  | 1.923568  | 0.486177  | O                                      | 0.348725  | -0.592086 | -0.657019 |                           |           |           |           |
| Cl                        | 2.731309  | -0.797981 | 1.561953  | C                                      | -0.972125 | -0.257341 | -0.305895 |                           |           |           |           |
| Cl                        | 4.647556  | 0.124647  | -0.473494 | C                                      | -1.787234 | -1.290922 | 0.143419  |                           |           |           |           |
| C                         | -3.896699 | 0.046450  | 1.005943  | C                                      | -1.450553 | 1.036805  | -0.492321 |                           |           |           |           |
| C                         | -3.108217 | 0.609008  | 0.055468  | H                                      | -1.376396 | -2.287621 | 0.266624  |                           |           |           |           |
| C                         | -2.261806 | -0.263848 | -0.782802 | H                                      | -0.792559 | 1.818370  | -0.856167 |                           |           |           |           |
| C                         | -2.459224 | -1.795736 | -0.667715 | C                                      | -3.127679 | -1.014559 | 0.422240  |                           |           |           |           |
| C                         | -3.485251 | -2.263493 | 0.280589  | C                                      | -2.791122 | 1.298642  | -0.203531 |                           |           |           |           |
| C                         | -4.092259 | -1.387702 | 1.115732  | H                                      | -3.775764 | -1.812237 | 0.772309  |                           |           |           |           |
| H                         | -4.494684 | 0.709124  | 1.624969  | C                                      | -3.629660 | 0.277770  | 0.252698  |                           |           |           |           |
| H                         | -1.943145 | 0.154527  | -1.731808 | H                                      | -4.671758 | 0.488865  | 0.472304  |                           |           |           |           |
| H                         | -2.263276 | -2.403893 | -1.547673 | H                                      | -3.179077 | 2.303437  | -0.340468 |                           |           |           |           |
| H                         | -3.766110 | -3.312682 | 0.260881  | <b>M<sub>3RB</sub>'-TS<sub>1</sub></b> |           |           |           |                           |           |           |           |
| H                         | -4.831785 | -1.748534 | 1.826799  | C                                      | 1.412099  | 0.001241  | 0.753274  |                           |           |           |           |
| O                         | -2.609068 | 2.440681  | -1.354202 | O                                      | 1.697111  | 0.911833  | 1.485640  |                           |           |           |           |
| C                         | -3.146894 | 2.111945  | -0.261301 |                                        |           |           |           |                           |           |           |           |
